# Supplementary material
Source: bioRxiv or medRxiv preprint supplement (http://www.medrxiv.org/highwire/filestream/72538/field_highwire_adjunct_files/11/2020.02.23.20027029-9.pdf)
Supplement: Supplementary file [file 2020.02.23.20027029-9.pdf]

Table S7

| Test | Feature1                                                 | Feature2              | CORONA_Q    | CORONA_LRP  | CORONA_R     | Feature1CORONA   | Feature2CORONA       |
|------|----------------------------------------------------------|-----------------------|-------------|-------------|--------------|------------------|----------------------|
| m.p  | Bacteria;Tenericutes;Mollicutes;Mollicutes_RF9           | Aix                   | 0.040506347 | 0.034534809 | 0.457328121  | NA               | NA                   |
| m.p  | OTU_81                                                   | HbA1C_IFCC            | 0.011045462 | 1.01214E-05 | 0.46624654   | NA               | NS-ENRICHED-NS       |
| m.p  | OTU_81                                                   | HbA1C                 | 0.014698839 | 8.89856E-06 | 0.459975873  | NA               | NS-ENRICHED-NS       |
| m.p  | Bacteria;Firmicutes;Erysipelotrichia                     | plasma_glucose        | 0.030574157 | 0.001867079 | -0.358856054 | NS-DEPLETED-NS   | NS-ENRICHED-NS       |
| m.p  | Bacteria;Proteobacteria;Betaproteobacteria;Burkholder    | HOMA                  | 0.023180623 | 0.017439428 | -0.37941467  | NS-DEPLETED-NS   | DEPLETED-ENRICHED-NS |
| m.p  | Bacteria;Proteobacteria;Betaproteobacteria;Burkholder    | insulin               | 0.005719204 | 0.012854819 | -0.417003172 | NS-DEPLETED-NS   | DEPLETED-ENRICHED-NS |
| m.p  | Bacteria;Proteobacteria;Betaproteobacteria               | c_SBP                 | 0.002442679 | 0.000438633 | -0.534837449 | NA               | NS-NS-DEPLETED       |
| m.p  | Bacteria;Proteobacteria;Betaproteobacteria               | MAP                   | 0.000999819 | 0.000231585 | -0.559654026 | NA               | NS-NS-DEPLETED       |
| m.p  | Bacteria;Proteobacteria;Betaproteobacteria               | c_DBP                 | 0.008907778 | 0.004593766 | -0.495088647 | NA               | NS-NS-DEPLETED       |
| m.p  | Bacteria;Proteobacteria;Betaproteobacteria               | DBP_ABPM_24h          | 0.020994605 | 0.01163381  | -0.465804841 | NA               | NA                   |
| m.p  | Bacteria;Proteobacteria;Betaproteobacteria               | insulin               | 0.012441433 | 0.034833351 | -0.38509618  | NA               | DEPLETED-ENRICHED-NS |
| m.p  | Bacteria;Firmicutes;Clostridia;Clostridiales;Peptostrept | HDL                   | 0.009284955 | 0.010579426 | 0.456092083  | NA               | NA                   |
| m.p  | Bacteria;Proteobacteria;Betaproteobacteria;Burkholder    | MAP                   | 0.048914436 | 0.007742882 | -0.46868366  | NA               | NS-NS-DEPLETED       |
| m.p  | Bacteria;Firmicutes;Clostridia;Clostridiales;Ruminococ   | CRP                   | 0.037157715 | 0.003022149 | -0.380345656 | NS-ENRICHED-NS   | NA                   |
| m.p  | Bacteria;Proteobacteria                                  | peripheral_resistance | 0.000885559 | 0.000690415 | -0.550487544 | NA               | NA                   |
| m.p  | Bacteria;Proteobacteria                                  | pulse                 | 0.000996249 | 0.001431004 | 0.54723116   | NA               | NS-NS-DEPLETED       |
| m.p  | OTU_69                                                   | waist_circumference   | 0.047547172 | 0.009336383 | -0.432844696 | NA               | DEPLETED-NS-DEPLETED |
| m.p  | Bacteria;Firmicutes;Clostridia;Clostridiales;Lachnospir  | HDL                   | 0.02439299  | 0.029351994 | -0.401742587 | NA               | NA                   |
| m.p  | Bacteria;Proteobacteria;Betaproteobacteria;Burkholder    | MAP                   | 0.039318138 | 0.001828494 | -0.515352089 | NA               | NS-NS-DEPLETED       |
| m.p  | Bacteria;Proteobacteria;Betaproteobacteria;Burkholder    | c_DBP                 | 0.038931344 | 0.00566681  | -0.515655539 | NA               | NS-NS-DEPLETED       |
| m.p  | Bacteria;Firmicutes;Clostridia;Clostridiales;Lachnospir  | creatinine            | 0.031598879 | 0.026220029 | 0.364874761  | ENRICHED-DEPLETE | NA                   |
| m.p  | Bacteria;Firmicutes;Clostridia;Clostridiales;Lachnospir  | eGFR                  | 0.005204965 | 0.013270068 | -0.43182642  | ENRICHED-DEPLETE | DEPLETED-NS-NS       |
| m.p  | Bacteria;Proteobacteria;Gammaproteobacteria;Enterot      | peripheral_resistance | 0.030579543 | 0.002354407 | -0.467471814 | NA               | NA                   |
| m.p  | Bacteria;Firmicutes;Negativicutes;Selenomonadales;A      | creatinine            | 0.024711742 | 0.010646649 | -0.391733975 | NA               | NA                   |
| m.p  | Bacteria;Proteobacteria;Gammaproteobacteria              | peripheral_resistance | 0.015213342 | 0.004815485 | -0.477113345 | NA               | NA                   |
| m.p  | OTU_52                                                   | creatinine            | 0.024094866 | 0.012619493 | -0.448831986 | NA               | NA                   |
| m.p  | Bacteria;Firmicutes;Clostridia;Clostridiales;Lachnospir  | DBP_office            | 0.010323411 | 6.67234E-05 | -0.453705137 | ENRICHED-DEPLETE | DEPLETED-ENRICHED-NS |
| m.p  | Archaea;Euryarchaeota;Methanobacteria;Methanobac         | DBP_office            | 0.045906033 | 0.009854865 | 0.359305347  | NA               | DEPLETED-ENRICHED-NS |
| m.p  | Bacteria;Actinobacteria;Coriobacteriia;Coriobacteriales  | weight                | 0.006978419 | 0.001219557 | 0.437316236  | NA               | DEPLETED-NS-DEPLETED |
| m.p  | Bacteria;Actinobacteria;Coriobacteriia;Coriobacteriales  | WHR                   | 0.000729769 | 6.24583E-05 | 0.508585955  | NA               | DEPLETED-NS-DEPLETED |
| m.p  | OTU_51                                                   | IGF                   | 0.002500917 | 0.006842925 | -0.496997043 | NA               | NS-ENRICHED-NS       |
| m.p  | OTU_99                                                   | eGFR                  | 0.001101801 | 0.019941376 | -0.512773975 | NA               | DEPLETED-NS-NS       |
| i.p  | 7_IFNg- % IL-17a- IL-22+ CD3+                            | cholesterol           | 0.047786542 | 0.033666974 | 0.341272897  | NA               | NA                   |
| i.p  | 9_IFNg+ TNFa+ Va7.2+ CD161+ CD4- CD3+ (ul)               | SBP_ABPM_24h          | 0.031950835 | 0.002685651 | 0.471138177  | DEPLETED-NS-NS   | NS-NS-DEPLETED       |
| i.p  | 9_IFNg+ TNFa+ Va7.2+ CD161+ CD4- CD3+ (ul)               | MAP                   | 0.042875396 | 0.000933959 | 0.509230166  | DEPLETED-NS-NS   | NS-NS-DEPLETED       |
| i.p  | 9_IFNg+ TNFa+ Va7.2+ CD161+ CD4- CD3+ (ul)               | c_SBP                 | 0.047621583 | 0.00563299  | 0.470157898  | DEPLETED-NS-NS   | NS-NS-DEPLETED       |
| i.p  | 9_IL-17a- IFNg+ Va7.2+ CD161 % CD3+                      | SBP_ABPM_day          | 0.039124008 | 0.007241027 | 0.502038265  | DEPLETED-NS-NS   | NS-NS-DEPLETED       |
| i.p  | 9_IL-17a- IFNg+ Va7.2+ CD161 % CD3+                      | SBP_ABPM_24h          | 0.02164621  | 0.001015781 | 0.516259308  | DEPLETED-NS-NS   | NS-NS-DEPLETED       |
| i.p  | 9_IL-17a- IFNg+ Va7.2+ CD161 % CD3+                      | c_SBP                 | 0.043100734 | 0.00399714  | 0.496556921  | DEPLETED-NS-NS   | NS-NS-DEPLETED       |
| i.p  | 9_IL-17a- IFNg+ Va7.2+ CD161 % CD3+                      | MAP                   | 0.042875396 | 0.002137163 | 0.496727419  | DEPLETED-NS-NS   | NS-NS-DEPLETED       |
| i.p  | 8_GM-CSF+ IL-2- IL-17a- % CD3+                           | SBP_ABPM_24h          | 0.04732574  | 0.04418285  | 0.431715606  | DEPLETED-ENRICHE | NS-NS-DEPLETED       |
| i.p  | 2_CD39+ CD45RA- % CD25high CD127low CD4+                 | HDL                   | 0.030903888 | 0.025576484 | -0.372826696 | NA               | NA                   |
| i.p  | 9_IL-2+ TNFa+ Va7.2+ CD161 % CD3+                        | SBP_ABPM_24h          | 0.043799456 | 0.001324267 | 0.448266927  | DEPLETED-NS-NS   | NS-NS-DEPLETED       |
| i.p  | 1_CD4+ CD8- % CD3+                                       | creatinine            | 0.029517054 | 0.012377275 | -0.380908111 | NA               | NA                   |
| i.p  | 7_Helios+ Ki67- CD4+ CD3+ (ul)                           | waist_circumference   | 0.038319526 | 0.024741976 | 0.337644406  | NA               | DEPLETED-NS-DEPLETED |
| i.p  | 7_Helios+ Ki67- CD4+ CD3+ (ul)                           | HOMA                  | 0.047942182 | 0.016793451 | -0.337489234 | NA               | DEPLETED-ENRICHED-NS |
| i.p  | 9_IFNg+ TNFa- Va7.2+ CD161+ CD4- CD3+ (ul)               | HOMA                  | 0.040861459 | 0.04438405  | 0.348205726  | DEPLETED-NS-NS   | DEPLETED-ENRICHED-NS |
| i.p  | 9_IFNg+ TNFa- Va7.2+ CD161+ CD4- CD3+ (ul)               | insulin               | 0.03807591  | 0.045855038 | 0.347792844  | DEPLETED-NS-NS   | DEPLETED-ENRICHED-NS |
| i.p  | 2_FoxP3+ CD45RA+ CD25high CD127low % CD4+                | pulse                 | 0.015955437 | 0.018420268 | 0.518754517  | NA               | NS-NS-DEPLETED       |
| i.p  | 2_CD39+ CD31- CD25high CD127low CD4+ (ul)                | CRP                   | 0.010450344 | 0.012894649 | 0.4255878    | DEPLETED-NS-NS   | NA                   |
| i.p  | 3_CD123+ CD14- CD16- HLA-DR+ CD4dim/- %                  | eGFR                  | 0.039599634 | 0.030784009 | -0.373457645 | ENRICHED-DEPLETE | DEPLETED-NS-NS       |
| i.p  | 7_Th1/2_Treg                                             | LDL                   | 0.028180936 | 0.008791895 | -0.364890512 | NA               | NA                   |
| i.p  | 7_Th1/2_Treg                                             | cholesterol           | 0.013174888 | 0.009047344 | -0.440971428 | NA               | NA                   |
| i.p  | 8_GM-CSF+ IL-2- % IL-17a- CD3+                           | SBP_ABPM_24h          | 0.04732574  | 0.045656669 | 0.430236268  | DEPLETED-ENRICHE | NS-NS-DEPLETED       |

Table S7

| Test | Feature1                                     | Feature2            | CORONA_Q    | CORONA_LRP  | CORONA_R     | Feature1CORONA   | Feature2CORONA         |
|------|----------------------------------------------|---------------------|-------------|-------------|--------------|------------------|------------------------|
| i.p  | 2_CD31+ CD45RA+ CD25high CD127low CD4+ (ul)  | pulse               | 0.018540148 | 0.004668404 | 0.508148648  | NA               | NS-NS-DEPLETED         |
| i.p  | 5_CD25- CD4+ CD8- CD3+ (ul)                  | eGFR                | 0.049836907 | 0.017131899 | 0.331182502  | DEPLETED-ENRICHE | DEPLETED-NS-NS         |
| i.p  | 5_CD24+ CD45RO+ % CD25+ CD4+ CD4high CD8-    | SBP_ABPM_nocturn    | 0.040371701 | 0.006930962 | 0.520345885  | NA               | NA                     |
| i.p  | 5_CD24+ CD45RO+ % CD25+ CD4+ CD4high CD8-    | LDL                 | 0.032141644 | 0.032871805 | 0.347874976  | NA               | NA                     |
| i.p  | 0_IL-17a- IFNg- TCRgd+ CD4- CD3+ (ul)        | insulin             | 0.036986231 | 0.045847031 | 0.350269359  | NA               | DEPLETED-ENRICHE       |
| i.p  | 2_FoxP3+ CD39+ CD25high CD127low CD4+ (ul)   | CRP                 | 0.010450344 | 0.02529238  | 0.426545222  | NA               | NA                     |
| i.p  | 5_CD24- CD45RO- CD8+ CD4- CD3+ (ul)          | waist_circumference | 0.024566098 | 0.03359319  | 0.356448047  | NA               | DEPLETED-NS-DEPLETED   |
| i.p  | 5_CD24- CD45RO- CD8+ CD4- CD3+ (ul)          | BMI                 | 0.024692696 | 0.036613077 | 0.372795625  | NA               | DEPLETED-NS-DEPLETED   |
| i.p  | 6_CD161- CCR6- CXCR3- % CD25+ CD4+           | creatinine          | 0.000450567 | 0.003126894 | 0.531494476  | NA               | NA                     |
| i.p  | 6_CD161- CCR6- CXCR3- % CD25+ CD4+           | HOMA                | 0.025932786 | 0.026053777 | 0.377891398  | NA               | DEPLETED-ENRICHE       |
| i.p  | 6_CD161- CCR6- CXCR3- % CD25+ CD4+           | insulin             | 0.014865868 | 0.007743383 | 0.409190975  | NA               | DEPLETED-ENRICHE       |
| i.p  | 6_CD27- CXCR3+ CD25- CD4+ (ul)               | creatinine          | 0.028385888 | 0.032802452 | -0.399163074 | NA               | NA                     |
| i.p  | 5_CD24+ CD45RO+ % CD8+ CD4-                  | IL-6                | 0.035441528 | 0.01238186  | -0.372481842 | NS-ENRICHE       | ENRI NA                |
| i.p  | 8_TNFa- IL-5- % IL-17a+ CD3+                 | creatinine          | 0.038169002 | 0.012330232 | 0.361755975  | ENRICHE          | NS-NS NA               |
| i.p  | 8_TNFa- IL-5- % IL-17a+ CD3+                 | eGFR                | 0.044729833 | 0.013892621 | -0.352930722 | ENRICHE          | NS-NS DEPLETED-NS-NS   |
| i.p  | 5_CD24+ CD45RO+ % CD25- CD4+ CD4high CD8-    | IL-6                | 0.014940976 | 0.003337193 | -0.416646179 | NA               | NA                     |
| i.p  | 0_TCRgd+ % CD3+                              | insulin             | 0.00357754  | 0.011353343 | 0.47344277   | NA               | DEPLETED-ENRICHE       |
| i.p  | 7_Helios- IFNg- CD4+ CD3+ (ul)               | eGFR                | 0.044729833 | 0.004590232 | 0.341599453  | NS-ENRICHE       | NS-NS DEPLETED-NS-NS   |
| i.p  | 7_Helios- IFNg- CD4+ CD3+ (ul)               | creatinine          | 0.043610016 | 0.006223636 | -0.346529935 | NS-ENRICHE       | NS-NS NA               |
| i.p  | 6_CD161+ CCR6+ CXCR3- CD25- CD4+ (ul)        | creatinine          | 0.028385888 | 0.002684295 | -0.396348741 | NA               | NA                     |
| i.p  | 5_CD62L- CD45RO+ CD8+ CD4- CD3+ (ul)         | DBP_office          | 0.020194319 | 0.001536365 | 0.451891749  | DEPLETED-ENRICHE | DEPLETED-ENRICHE       |
| i.p  | 5_CD62L+ CD45RO- CD25+ CD4+ CD8- CD3+ (ul)   | eGFR                | 0.048212776 | 0.047866055 | 0.332444223  | DEPLETED-ENRICHE | DEPLETED-NS-NS         |
| i.p  | 0_IL-17a- IFNg- TCRgd+ % CD3+                | insulin             | 0.014865868 | 0.016669054 | 0.419279418  | NA               | DEPLETED-ENRICHE       |
| i.p  | 0_IL-17a- IFNg- TCRgd+ % CD3+                | HOMA                | 0.031603347 | 0.034131314 | 0.368912859  | NA               | DEPLETED-ENRICHE       |
| i.p  | 8_TNFa- IL-2- IL-17a+ CD4+ CD3+ (ul)         | HOMA                | 0.021548595 | 0.019047938 | 0.3857469    | NS-ENRICHE       | NS-NS DEPLETED-ENRICHE |
| i.p  | 8_TNFa- IL-5- IL-17a+ CD4+ CD3+ (ul)         | HOMA                | 0.012799301 | 0.005987445 | 0.414072646  | NA               | DEPLETED-ENRICHE       |
| i.p  | 9_IL-2+ TNFa+ Va7.2+ CD161+ CD4- CD3+ (ul)   | SBP_ABPM_24h        | 0.043799456 | 0.001777637 | 0.43823865   | DEPLETED-NS-NS   | NS-NS-DEPLETED         |
| i.p  | 7_Helios+ IFNg- CD4+ CD3+ (ul)               | HOMA                | 0.039315004 | 0.020725041 | -0.350517437 | NS-DEPLETED-NS   | DEPLETED-ENRICHE       |
| i.p  | 9_IL-17a- IFNg+ Va7.2+ CD161+ CD4- CD3+ (ul) | MAP                 | 0.042875396 | 0.000330541 | 0.544747737  | DEPLETED-NS-NS   | NS-NS-DEPLETED         |
| i.p  | 9_IL-17a- IFNg+ Va7.2+ CD161+ CD4- CD3+ (ul) | c_SBP               | 0.043100734 | 0.002966915 | 0.496651182  | DEPLETED-NS-NS   | NS-NS-DEPLETED         |
| i.p  | 9_IL-17a- IFNg+ Va7.2+ CD161+ CD4- CD3+ (ul) | SBP_ABPM_day        | 0.043098225 | 0.007889053 | 0.472836413  | DEPLETED-NS-NS   | NS-NS-DEPLETED         |
| i.p  | 9_IL-17a- IFNg+ Va7.2+ CD161+ CD4- CD3+ (ul) | SBP_ABPM_24h        | 0.02164621  | 0.001388241 | 0.494354059  | DEPLETED-NS-NS   | NS-NS-DEPLETED         |
| i.p  | 5_CD62L- CD45RO- CD25- CD4+ CD8- CD3+ (ul)   | creatinine          | 0.038982389 | 0.039340082 | -0.358878653 | NA               | NA                     |
| i.p  | 6_CD25- CD4+ (ul)                            | eGFR                | 0.044729833 | 0.019499813 | 0.340369105  | DEPLETED-ENRICHE | DEPLETED-NS-NS         |
| i.p  | 7_Th17/Treg                                  | HDL                 | 0.011805108 | 0.021763446 | 0.443143957  | NA               | NA                     |
| i.p  | 8_TNFa- IL-5+ IL-17a+ CD4+ CD3+ (ul)         | DBP_office          | 0.02903607  | 0.003533375 | 0.413976347  | DEPLETED-ENRICHE | DEPLETED-ENRICHE       |
| i.p  | 3_HLA-DR-CD4dim/- %                          | creatinine          | 0.043610016 | 0.017511615 | 0.345071881  | NA               | NA                     |
| i.p  | 7_Th17/Th1                                   | LDL                 | 0.028180936 | 0.001698317 | 0.355936813  | NA               | NA                     |
| i.p  | 7_Th17/Th1                                   | cholesterol         | 0.013174888 | 0.002273476 | 0.441971859  | NA               | NA                     |
| i.p  | 6_CD161+ CCR6- CXCR3- CD25- CD4+ (ul)        | creatinine          | 0.005225839 | 0.020181008 | -0.461497463 | NA               | NA                     |
| i.p  | 9_IL-17a- TNFa+ Va7.2+ CD161 % CD3+          | SBP_ABPM_day        | 0.039124008 | 0.006032091 | 0.51050421   | NA               | NS-NS-DEPLETED         |
| i.p  | 9_IL-17a- TNFa+ Va7.2+ CD161 % CD3+          | SBP_ABPM_24h        | 0.02164621  | 0.001158271 | 0.535583767  | NA               | NS-NS-DEPLETED         |
| i.p  | 9_IL-17a- TNFa+ Va7.2+ CD161 % CD3+          | c_SBP               | 0.03474208  | 0.0011761   | 0.535975786  | NA               | NS-NS-DEPLETED         |
| i.p  | 9_IL-17a- TNFa+ Va7.2+ CD161 % CD3+          | MAP                 | 0.042875396 | 0.002022834 | 0.499876453  | NA               | NS-NS-DEPLETED         |
| i.p  | 5_CD24+ CD45RO+ CD25+ CD4+ CD8- CD3+ (ul)    | LDL                 | 0.005880922 | 0.002297915 | 0.424497663  | NA               | NA                     |
| i.p  | 5_CD24+ CD45RO+ CD25+ CD4+ CD8- CD3+ (ul)    | cholesterol         | 0.016532407 | 0.002682699 | 0.40989013   | NA               | NA                     |
| i.p  | 5_CD24+ CD45RO+ CD25+ CD4+ CD8- CD3+ (ul)    | SBP_ABPM_nocturn    | 0.00882391  | 0.001889227 | 0.573819189  | NA               | NA                     |
| i.p  | 6_Th1/2_Treg                                 | SBP_ABPM_24h        | 0.02164621  | 0.009821451 | -0.503500247 | NA               | NS-NS-DEPLETED         |
| i.p  | 6_Th1/2_Treg                                 | SBP_ABPM_day        | 0.039124008 | 0.008890606 | -0.52756915  | NA               | NS-NS-DEPLETED         |
| i.p  | 6_Th1/2_Treg                                 | c_SBP               | 0.047621583 | 0.014450962 | -0.490269652 | NA               | NS-NS-DEPLETED         |
| i.p  | 0_IL-17a- IL-22- TCRgd+ % CD3+               | insulin             | 0.00357754  | 0.012189075 | 0.469748145  | NA               | DEPLETED-ENRICHE       |
| i.p  | 1_CD4- CD8- %                                | HOMA                | 0.011600412 | 0.003865541 | 0.451417088  | NA               | DEPLETED-ENRICHE       |
| i.p  | 1_CD4- CD8- %                                | insulin             | 0.0012678   | 0.000882666 | 0.512641527  | NA               | DEPLETED-ENRICHE       |
| i.p  | 1_CD4- CD8- %                                | creatinine          | 0.028385888 | 0.034485494 | 0.4046486    | NA               | NA                     |

Table S7

| Test | Feature1                                     | Feature2          | CORONA_Q    | CORONA_LRP  | CORONA_R     | Feature1CORONA    | Feature2CORONA             |
|------|----------------------------------------------|-------------------|-------------|-------------|--------------|-------------------|----------------------------|
| i.p  | 8_IL-10-IL-2-IL-17a+ CD4+ CD3+ (ul)          | HOMA              | 0.038069366 | 0.033784964 | 0.36036036   | DEPLETED-ENRICHED | DEPLETED-ENRICHED-NS       |
| i.p  | 8_GM-CSF+IL-2-IL-17a- CD4+ CD3+ (ul)         | IL-6              | 0.02220931  | 0.033151944 | 0.394367414  | DEPLETED-ENRICHED | NA                         |
| i.p  | 8_IL-10-IL-2+ % IL-17a- CD3+                 | SBP_ABPM_24h      | 0.043799456 | 0.028208227 | 0.441305179  | NA                | NS-NS-DEPLETED             |
| i.p  | 8_IL-10-IL-2+ % IL-17a- CD3+                 | SBP_ABPM_day      | 0.042322924 | 0.013307487 | 0.476849256  | NA                | NS-NS-DEPLETED             |
| i.p  | 8_GM-CSF+IL-2+IL-17a- % CD3+                 | SBP_ABPM_24h      | 0.03758445  | 0.035427794 | 0.457094856  | NA                | NS-NS-DEPLETED             |
| i.p  | 8_GM-CSF+IL-2+IL-17a- % CD3+                 | SBP_ABPM_day      | 0.043098225 | 0.025714641 | 0.467768004  | NA                | NS-NS-DEPLETED             |
| i.p  | 8_GM-CSF+IL-2+IL-17a- % CD3+                 | c_SBP             | 0.047621583 | 0.016168824 | 0.465839438  | NA                | NS-NS-DEPLETED             |
| i.p  | 6_CD161+ CCR6+ % CXCR3- CD25+ CD4+           | HOMA              | 0.018377189 | 0.049625247 | -0.399477688 | NA                | DEPLETED-ENRICHED-NS       |
| i.p  | 3_HLA-DR+ CD16+HLA-DR- CD16- (ul)            | eGFR              | 0.044729833 | 0.004090073 | 0.350704033  | NA                | DEPLETED-NS-NS             |
| i.p  | 9_IFNg+ TNFa+ Va7.2+ CD161 % CD3+            | SBP_ABPM_24h      | 0.02164621  | 0.001524978 | 0.527516665  | DEPLETED-NS-NS    | NS-NS-DEPLETED             |
| i.p  | 9_IFNg+ TNFa+ Va7.2+ CD161 % CD3+            | SBP_ABPM_day      | 0.039124008 | 0.006022536 | 0.518166099  | DEPLETED-NS-NS    | NS-NS-DEPLETED             |
| i.p  | 9_IFNg+ TNFa+ Va7.2+ CD161 % CD3+            | MAP               | 0.042875396 | 0.001798026 | 0.507258464  | DEPLETED-NS-NS    | NS-NS-DEPLETED             |
| i.p  | 9_IFNg+ TNFa+ Va7.2+ CD161 % CD3+            | c_SBP             | 0.03474208  | 0.002424716 | 0.519324051  | DEPLETED-NS-NS    | NS-NS-DEPLETED             |
| i.p  | 7_IL-17a-IL-22- CD4+ CD3+ (ul)               | eGFR              | 0.044729833 | 0.005031556 | 0.338673958  | DEPLETED-ENRICHED | DEPLETED-NS-NS             |
| i.p  | 8_GM-CSF-IL-2- % IL-17a- CD3+                | c_SBP             | 0.047621583 | 0.00974228  | -0.482956783 | NA                | NS-NS-DEPLETED             |
| i.p  | 8_GM-CSF-IL-2- % IL-17a- CD3+                | SBP_ABPM_24h      | 0.02164621  | 0.01139675  | -0.488969034 | NA                | NS-NS-DEPLETED             |
| i.p  | 8_GM-CSF-IL-2- % IL-17a- CD3+                | SBP_ABPM_day      | 0.039124008 | 0.007805581 | -0.505295485 | NA                | NS-NS-DEPLETED             |
| i.p  | 8_GM-CSF+IL-2+ % IL-17a+ CD3+                | c_SBP             | 0.03474208  | 0.000526292 | 0.527728864  | NA                | NS-NS-DEPLETED             |
| i.p  | 8_GM-CSF+IL-2+ % IL-17a+ CD3+                | SBP_ABPM_24h      | 0.043799456 | 0.021300187 | 0.439818406  | NA                | NS-NS-DEPLETED             |
| i.p  | 5_CD24- CD45RO+ CD8+ CD4- CD3+ (ul)          | DBP_office        | 0.020194319 | 0.00327971  | 0.430584744  | DEPLETED-NS-NS    | DEPLETED-ENRICHED-NS       |
| i.p  | 5_CD24+ CD45RO+ CD25- CD4+ CD8- CD3+ (ul)    | IL-6              | 0.024821547 | 0.020891904 | -0.386707669 | NA                | NA                         |
| i.p  | 8_TNFa-IL-2+ % IL-17a- CD3+                  | c_SBP             | 0.049691645 | 0.021778497 | 0.460178008  | NA                | NS-NS-DEPLETED             |
| i.p  | 8_TNFa-IL-2+ % IL-17a- CD3+                  | SBP_ABPM_day      | 0.042322924 | 0.014323159 | 0.482017941  | NA                | NS-NS-DEPLETED             |
| i.p  | 8_TNFa-IL-2+ % IL-17a- CD3+                  | SBP_ABPM_24h      | 0.02164621  | 0.017573277 | 0.486772956  | NA                | NS-NS-DEPLETED             |
| i.p  | 5_CD62L- CD45RO- % CD8+ CD4-                 | cholesterol       | 0.04321578  | 0.029715703 | -0.352373571 | ENRICHED-NS-NS    | NA                         |
| i.p  | 8_IL-10-IL-2+IL-17a- % CD3+                  | SBP_ABPM_day      | 0.042322924 | 0.012535913 | 0.478916082  | NA                | NS-NS-DEPLETED             |
| i.p  | 8_IL-10-IL-2+IL-17a- % CD3+                  | SBP_ABPM_24h      | 0.043799456 | 0.026599538 | 0.443104363  | NA                | NS-NS-DEPLETED             |
| i.p  | 2_FoxP3+ CD31+ CD25high CD127low % CD4+      | hip_circumference | 0.047024998 | 0.006761688 | 0.340587617  | NA                | DEPLETED-DEPLETED-DEPLETED |
| i.p  | 8_GM-CSF+IL-2+ % IL-17a- CD3+                | c_SBP             | 0.047621583 | 0.015888073 | 0.46690145   | NA                | NS-NS-DEPLETED             |
| i.p  | 8_GM-CSF+IL-2+ % IL-17a- CD3+                | SBP_ABPM_24h      | 0.03758445  | 0.034404269 | 0.458449529  | NA                | NS-NS-DEPLETED             |
| i.p  | 8_GM-CSF+IL-2+ % IL-17a- CD3+                | SBP_ABPM_day      | 0.043098225 | 0.024256872 | 0.46988003   | NA                | NS-NS-DEPLETED             |
| i.p  | 6_CD161- CCR6- % CXCR3- CD25+ CD4+           | creatinine        | 0.004119127 | 0.015633257 | 0.475383627  | NA                | NA                         |
| i.p  | 6_CD161- CCR6- % CXCR3- CD25+ CD4+           | insulin           | 0.021043716 | 0.02952311  | 0.373972793  | NA                | DEPLETED-ENRICHED-NS       |
| i.p  | 2_CD39- CD45RA+ CD25high CD127low CD4+ (ul)  | pulse             | 0.005503175 | 0.000996447 | 0.568127839  | NA                | NS-NS-DEPLETED             |
| i.p  | 2_FoxP3+ CD45RA+ CD25high CD127low CD4+ (ul) | pulse             | 0.015829932 | 0.006010594 | 0.523023674  | NA                | NS-NS-DEPLETED             |
| i.p  | 8_IL-10-IL-2-IL-17a+ % CD3+                  | DBP_office        | 0.04505293  | 0.005681841 | 0.396566468  | DEPLETED-NS-NS    | DEPLETED-ENRICHED-NS       |
| i.p  | 8_IL-10-IL-2-IL-17a+ % CD3+                  | HOMA              | 0.011600412 | 0.007257054 | 0.443409011  | DEPLETED-NS-NS    | DEPLETED-ENRICHED-NS       |
| i.p  | 8_GM-CSF-IL-2-IL-17a+ % CD3+                 | insulin           | 0.014865868 | 0.013792492 | 0.413557329  | NA                | DEPLETED-ENRICHED-NS       |
| i.p  | 8_GM-CSF-IL-2-IL-17a+ % CD3+                 | HOMA              | 0.004158931 | 0.001172702 | 0.489502654  | NA                | DEPLETED-ENRICHED-NS       |
| i.p  | 2_CD31- CD45RA+ CD25high CD127low CD4+ (ul)  | pulse             | 0.007080556 | 0.001283843 | 0.555524742  | NA                | NS-NS-DEPLETED             |
| i.p  | 1_CD4dim CD8bright % CD4+ CD8+ CD3+          | Reflex            | 0.033179155 | 0.012075868 | 0.542852739  | NA                | NA                         |
| i.p  | 7_IFNg+ % IL-17a-IL-22+ CD3+                 | cholesterol       | 0.047786542 | 0.033707057 | -0.34109348  | NA                | NA                         |
| i.p  | 8_TNFa-IL-2+IL-17a- % CD3+                   | c_SBP             | 0.047621583 | 0.018181924 | 0.464205416  | NA                | NS-NS-DEPLETED             |
| i.p  | 8_TNFa-IL-2+IL-17a- % CD3+                   | SBP_ABPM_24h      | 0.02164621  | 0.014820897 | 0.489187452  | NA                | NS-NS-DEPLETED             |
| i.p  | 8_TNFa-IL-2+IL-17a- % CD3+                   | SBP_ABPM_day      | 0.042322924 | 0.01177497  | 0.485490453  | NA                | NS-NS-DEPLETED             |
| i.p  | 2_FoxP3- CD45RA+ CD25high CD127low % CD4+    | pulse             | 0.018540148 | 0.003123042 | 0.507208039  | NA                | NS-NS-DEPLETED             |
| i.p  | 2_FoxP3- CD45RA+ CD25high CD127low % CD4+    | HMV               | 0.03905355  | 0.002966767 | 0.552856907  | NA                | NS-NS-DEPLETED             |
| i.p  | 7_IFNg+IL-17a- % CD3+                        | cholesterol       | 0.04321578  | 0.026188549 | -0.352619388 | NA                | NA                         |
| i.p  | 5_CD4 Tem/2_Treg                             | hip_circumference | 0.002792505 | 0.04400709  | -0.486788096 | NA                | DEPLETED-DEPLETED-DEPLETED |
| i.p  | 1_CD4bright CD8dim % CD4+ CD8+ CD3+          | Reflex            | 0.033179155 | 0.017602985 | -0.538041637 | NA                | NA                         |
| i.p  | 6_CD27- CD161+ CCR6+ CXCR3- CD25- CD4+ (ul)  | creatinine        | 0.041746021 | 0.006799394 | -0.352180206 | NA                | NA                         |
| i.p  | 0_IL-17a+IL-22+ % TCRgd+ CD3+                | HDL               | 0.011864591 | 0.045426434 | -0.430715682 | NA                | NA                         |
| i.p  | 8_TNFa-IL-5+IL-17a+ % CD3+                   | DBP_office        | 0.020194319 | 0.002484983 | 0.43020505   | NA                | DEPLETED-ENRICHED-NS       |
| i.p  | 2_CD39+ CD31- % CD25high CD127low CD4+       | HDL               | 0.042152953 | 0.013796561 | -0.35583209  | NA                | NA                         |

Table S7

| Test | Feature1                                                | Feature2                                          | CORONA_Q    | CORONA_LRP  | CORONA_R     | Feature1CORONA    | Feature2CORONA             |
|------|---------------------------------------------------------|---------------------------------------------------|-------------|-------------|--------------|-------------------|----------------------------|
| i.p  | 8_TNFa+ IL-5- IL-17a+ % CD3+                            | HOMA                                              | 0.047942182 | 0.034130398 | 0.337051227  | NA                | DEPLETED-ENRICHED-NS       |
| i.p  | 9_IFNg+ TNFa- Va7.2+ CD161 % CD3+                       | HOMA                                              | 0.012799301 | 0.007197407 | 0.414673423  | DEPLETED-NS-NS    | DEPLETED-ENRICHED-NS       |
| i.p  | 9_IFNg+ TNFa- Va7.2+ CD161 % CD3+                       | insulin                                           | 0.014865868 | 0.00818028  | 0.40856287   | DEPLETED-NS-NS    | DEPLETED-ENRICHED-NS       |
| i.p  | 9_IL-17a- TNFa+ Va7.2+ CD161+ CD4- CD3+ (ul)            | c_SBP                                             | 0.03474208  | 0.001406151 | 0.516161106  | DEPLETED-NS-NS    | NS-NS-DEPLETED             |
| i.p  | 9_IL-17a- TNFa+ Va7.2+ CD161+ CD4- CD3+ (ul)            | MAP                                               | 0.042875396 | 0.001001076 | 0.508086537  | DEPLETED-NS-NS    | NS-NS-DEPLETED             |
| i.p  | 9_IL-17a- TNFa+ Va7.2+ CD161+ CD4- CD3+ (ul)            | SBP_ABPM_day                                      | 0.042322924 | 0.005945208 | 0.477587263  | DEPLETED-NS-NS    | NS-NS-DEPLETED             |
| i.p  | 9_IL-17a- TNFa+ Va7.2+ CD161+ CD4- CD3+ (ul)            | SBP_ABPM_24h                                      | 0.02164621  | 0.001106    | 0.502811367  | DEPLETED-NS-NS    | NS-NS-DEPLETED             |
| i.p  | 8_GM-CSF- IL-2- IL-17a- % CD3+                          | c_SBP                                             | 0.047621583 | 0.009229564 | -0.488096444 | NA                | NS-NS-DEPLETED             |
| i.p  | 8_GM-CSF- IL-2- IL-17a- % CD3+                          | SBP_ABPM_day                                      | 0.039124008 | 0.010399308 | -0.499691321 | NA                | NS-NS-DEPLETED             |
| i.p  | 8_GM-CSF- IL-2- IL-17a- % CD3+                          | SBP_ABPM_24h                                      | 0.033827713 | 0.021468581 | -0.466168316 | NA                | NS-NS-DEPLETED             |
| i.p  | 8_TNFa- IL-2- IL-17a+ % CD3+                            | HOMA                                              | 0.012799301 | 0.012080739 | 0.420407472  | NA                | DEPLETED-ENRICHED-NS       |
| i.p  | 7_IL-17a+ Ki67- % CD3+                                  | HDL                                               | 0.011805108 | 0.037948492 | 0.439895732  | NA                | NA                         |
| i.p  | 8_TNFa- IL-5- IL-17a+ % CD3+                            | HOMA                                              | 0.012799301 | 0.008111343 | 0.430450543  | NA                | DEPLETED-ENRICHED-NS       |
| i.p  | 2_CD31- CD45RA+ % CD25high CD127low CD4+                | pulse                                             | 0.019036654 | 0.025962935 | 0.50335182   | NA                | NS-NS-DEPLETED             |
| i.p  | 2_CD39- CD45RA+ % CD25high CD127low CD4+                | pulse                                             | 0.004251789 | 0.001367508 | 0.59190048   | NA                | NS-NS-DEPLETED             |
| i.p  | 9_IL2- TNFa+ Va7.2+ CD161+ CD4- CD3+ (ul)               | SBP_ABPM_24h                                      | 0.04732574  | 0.01716272  | 0.428870132  | DEPLETED-NS-NS    | NS-NS-DEPLETED             |
| i.p  | 1_CD4- CD8- % CD3+                                      | creatinine                                        | 0.028385888 | 0.015194722 | 0.407273968  | ENRICHED-DEPLETED | NA                         |
| i.p  | 6_CD161+ CCR6- % CXCR3- CD25- CD4+                      | IL-6                                              | 0.006563022 | 0.041285883 | -0.458618082 | NA                | NA                         |
| i.p  | 2_FoxP3+ CD31+ CD25high CD127low CD4+ (ul)              | hip_circumference                                 | 0.011869352 | 0.033107092 | 0.399570239  | NA                | DEPLETED-DEPLETED-DEPLETED |
| i.p  | 2_CD39- CD45RA+ CD25high CD127low % CD4+                | pulse                                             | 0.004251789 | 0.000643636 | 0.598133747  | NA                | NS-NS-DEPLETED             |
| i.p  | 6_CD161+ CCR6- CXCR3- % CD25- CD4+                      | IL-6                                              | 0.006563022 | 0.038792385 | -0.455810799 | NA                | NA                         |
| i.p  | 8_TNFa- IL-2+ IL-17a- CD4+ CD3+ (ul)                    | LDL                                               | 0.000715492 | 0.004942333 | 0.522389174  | DEPLETED-ENRICHED | NA                         |
| i.p  | 8_TNFa- IL-2+ IL-17a- CD4+ CD3+ (ul)                    | cholesterol                                       | 0.013174888 | 0.006510325 | 0.4545965    | DEPLETED-ENRICHED | NA                         |
| i.p  | 5_CD24+ CD45RO+ CD25- CD4+ % CD4high CD8-               | IL-6                                              | 0.014940976 | 0.003154609 | -0.41853964  | NA                | NA                         |
| i.p  | 5_CD4high %                                             | eGFR                                              | 0.039844741 | 0.005449514 | 0.366565728  | NA                | DEPLETED-NS-NS             |
| i.p  | 3_CD4high %                                             | creatinine                                        | 0.045064144 | 0.028779241 | -0.33804937  | DEPLETED-NS-NS    | NA                         |
| i.p  | 3_CD14hi CD16- HLA-DR+ CD16+/HLA-DR- CD16- (ul)         | waist_circumference                               | 0.020114528 | 0.029043997 | 0.366493077  | NA                | DEPLETED-NS-DEPLETED       |
| i.p  | 7_Helios- IFNg+ % CD3+                                  | cholesterol                                       | 0.040534536 | 0.029800436 | -0.357032991 | NA                | NA                         |
| i.p  | 2_CD31- CD45RA+ CD25high CD127low % CD4+                | pulse                                             | 0.004560692 | 0.001563436 | 0.580245388  | NA                | NS-NS-DEPLETED             |
| i.p  | 5_CD62L- CD45RO- CD25+ CD4+ CD8- CD3+ (ul)              | BMI                                               | 0.02359063  | 0.047893659 | 0.382776122  | DEPLETED-ENRICHED | DEPLETED-NS-DEPLETED       |
| i.p  | 5_CD62L- CD45RO- CD25+ CD4+ CD8- CD3+ (ul)              | weight                                            | 0.024976753 | 0.048436845 | 0.370120855  | DEPLETED-ENRICHED | DEPLETED-NS-DEPLETED       |
| i.p  | 1_CD4+ CD8- CD3+ (ul)                                   | creatinine                                        | 0.045064144 | 0.013535513 | -0.337258139 | DEPLETED-ENRICHED | NA                         |
| i.p  | 1_CD4+ CD8- CD3+ (ul)                                   | eGFR                                              | 0.032790022 | 0.001848992 | 0.392098428  | DEPLETED-ENRICHED | DEPLETED-NS-NS             |
| i.p  | 6_CXCR3- CD25- CD4+ (ul)                                | eGFR                                              | 0.044729833 | 0.031839795 | 0.348489405  | DEPLETED-ENRICHED | DEPLETED-NS-NS             |
| i.p  | 8_GM-CSF- IL-2- IL-17a+ CD4+ CD3+ (ul)                  | HOMA                                              | 0.012799301 | 0.007927082 | 0.416724767  | DEPLETED-ENRICHED | DEPLETED-ENRICHED-NS       |
| i.p  | 2_FoxP3- CD45RA+ CD25high CD127low CD4+ (ul)            | pulse                                             | 0.013855447 | 0.000799629 | 0.531527444  | NA                | NS-NS-DEPLETED             |
| i.p  | 5_CD24+ CD45RO+ CD25+ CD4+ % CD4high CD8-               | SBP_ABPM_nocturn                                  | 0.00882391  | 0.000837864 | 0.588553259  | NA                | NA                         |
| i.p  | 5_CD24+ CD45RO+ CD25+ CD4+ % CD4high CD8-               | cholesterol                                       | 0.030558089 | 0.014065796 | 0.368391881  | NA                | NA                         |
| i.p  | 5_CD24+ CD45RO+ CD25+ CD4+ % CD4high CD8-               | LDL                                               | 0.015732364 | 0.010974436 | 0.381817095  | NA                | NA                         |
| i.p  | 5_CD24+ CD45RO+ CD25+ CD4+ % CD4high CD8-               | c_SBP                                             | 0.047621583 | 0.011980618 | 0.465449621  | NA                | NS-NS-DEPLETED             |
| i.p  | 7_IFNg- IL-17a- CD4+ CD3+ (ul)                          | eGFR                                              | 0.048212776 | 0.031264388 | 0.333123718  | DEPLETED-ENRICHED | DEPLETED-NS-NS             |
| i.p  | 9_IL2- TNFa+ Va7.2+ CD161 % CD3+                        | SBP_ABPM_24h                                      | 0.043799456 | 0.039756311 | 0.438461543  | NA                | NS-NS-DEPLETED             |
| m.i  | Bacteria;Proteobacteria;Gammaproteobacteria;Enterot     | 4_CD56- CD16+ CD3- %                              | 0.037495578 | 0.036412155 | -0.411113204 | NA                | NA                         |
| m.i  | Bacteria;Proteobacteria;Gammaproteobacteria;Enterot     | 2_CD39- CD31+ CD25high CD127low CD4+ (ul)         | 0.041931682 | 0.006207541 | 0.379323315  | NA                | NA                         |
| m.i  | Bacteria;Proteobacteria;Gammaproteobacteria;Enterot     | 4_CD56- CD16+ % CD3-                              | 0.037495578 | 0.036412155 | -0.411113204 | NA                | NA                         |
| m.i  | Bacteria;Proteobacteria;Betaproteobacteria;Burkholderi  | 3_CD14low CD16++ % HLA-DR+ CD16+/HLA-DR- CD16-    | 0.001400462 | 0.000750809 | -0.489297375 | NA                | ENRICHED-DEPLETED-NS       |
| m.i  | Bacteria;Proteobacteria;Betaproteobacteria;Burkholderi  | 3_CD14low CD16++ HLA-DR+ CD16+/HLA-DR- CD16- (ul) | 0.001400462 | 5.76001E-05 | -0.509163544 | NA                | NS-DEPLETED-NS             |
| m.i  | Bacteria;Proteobacteria;Betaproteobacteria;Burkholderi  | 3_CD14low CD16++ HLA-DR+ CD16+/HLA-DR- CD16-%     | 0.001400462 | 0.000719363 | -0.494295703 | NA                | ENRICHED-DEPLETED-NS       |
| m.i  | Bacteria;Firmicutes;Clostridia;Clostridiales;Lachnospir | 2_FoxP3+ % CD25high CD127low CD4+                 | 0.045624257 | 0.003553588 | 0.396225899  | ENRICHED-DEPLETED | NA                         |
| m.i  | Bacteria;Firmicutes;Clostridia;Clostridiales;Lachnospir | 2_FoxP3+ CD31- % CD25high CD127low CD4+           | 0.045624257 | 0.002489356 | 0.423364352  | ENRICHED-DEPLETED | NA                         |
| m.i  | OTU_126                                                 | 6_CD161- CCR6- % CXCR3- CD25- CD4+                | 0.025618343 | 0.034562984 | 0.431037347  | NA                | NA                         |
| m.i  | OTU_126                                                 | 6_CD161- CCR6- CXCR3- % CD25- CD4+                | 0.020793751 | 0.02786684  | 0.436058223  | NA                | NA                         |
| m.i  | Bacteria;Firmicutes;Clostridia;Clostridiales;Ruminococ  | 6_CD27- CD161+ CCR6+ % CXCR3- CD25- CD4+          | 0.001716612 | 0.03260125  | 0.491879005  | NA                | NA                         |
| m.i  | Bacteria;Firmicutes;Clostridia;Clostridiales;Ruminococ  | 6_CD27- CD161+ CCR6+ CXCR3- CD25- CD4+ (ul)       | 0.00291159  | 0.001541649 | 0.481102728  | NA                | NA                         |

Table S7

| Test | Feature1                                                 | Feature2                                     | CORONA_Q    | CORONA_LRP  | CORONA_R     | Feature1CORONA    | Feature2CORONA       |
|------|----------------------------------------------------------|----------------------------------------------|-------------|-------------|--------------|-------------------|----------------------|
| m.i  | Bacteria;Firmicutes;Clostridia;Clostridiales;Ruminococ   | 6_CD27- % CD161+ CCR6+ CXCR3- CD25- CD4+     | 0.001297122 | 0.026590818 | 0.498871393  | NA                | NA                   |
| m.i  | Bacteria;Firmicutes;Clostridia;Clostridiales;Ruminococ   | 6_CD27- CD161+ CCR6+ CXCR3- % CD25- CD4+     | 0.001878566 | 0.043713449 | 0.490065767  | NA                | NA                   |
| m.i  | Bacteria;Firmicutes;Clostridia;Clostridiales;Lachnospir  | 8_TNFa+ IL-5+ IL-17a+ % CD3+                 | 0.007299688 | 0.002978342 | 0.477928031  | NA                | DEPLETED-ENRICHED-NS |
| m.i  | Bacteria;Firmicutes;Clostridia;Clostridiales;Lachnospir  | 8_TNFa+ IL-2+ IL-17a+ % CD3+                 | 0.037930988 | 0.001402772 | 0.422860844  | NA                | NA                   |
| m.i  | Bacteria;Firmicutes;Clostridia;Clostridiales;Lachnospir  | 8_TNFa+ IL-5+ IL-17a+ CD4+ CD3+ (ul)         | 0.020848646 | 0.007575913 | 0.437414813  | NA                | DEPLETED-ENRICHED-NS |
| m.i  | Bacteria;Firmicutes;Clostridia;Clostridiales;Lachnospir  | 8_TNFa+ IL-2- IL-17a+ % CD3+                 | 0.013304363 | 0.004213957 | 0.449612132  | NA                | DEPLETED-NS-NS       |
| m.i  | Bacteria;Firmicutes;Clostridia;Clostridiales;Lachnospir  | 8_TNFa+ IL-2- IL-17a+ CD4+ CD3+ (ul)         | 0.018368941 | 0.00929383  | 0.433250442  | NA                | DEPLETED-ENRICHED-NS |
| m.i  | Bacteria;Firmicutes;Clostridia;Clostridiales;Ruminococ   | 4_TCRgd+ % CD4- CD8- CD3+                    | 0.004954802 | 0.035565349 | -0.485944924 | DEPLETED-ENRICHED | ENRICHED-DEPLETED-NS |
| m.i  | Bacteria;Firmicutes;Clostridia;Clostridiales;Lachnospir  | 4_TCRgd+ % CD4- CD8- CD3+                    | 0.030460638 | 0.032101531 | 0.398046784  | NA                | ENRICHED-DEPLETED-NS |
| m.i  | Bacteria;Firmicutes;Clostridia;Clostridiales;Lachnospir  | 0_IL-17a+ IL-22- TCRgd+ CD4- CD3+ (ul)       | 0.012419509 | 0.024962911 | 0.440644259  | NA                | NA                   |
| m.i  | Bacteria;Firmicutes;Clostridia;Clostridiales;Lachnospir  | 0_IL-17a+ IFNg+ TCRgd+ CD4- CD3+ (ul)        | 0.036889053 | 0.038958018 | 0.4013928    | NA                | DEPLETED-NS-NS       |
| m.i  | Bacteria;Firmicutes;Clostridia;Clostridiales;Lachnospir  | 10_CD69+ % CD4- CD8- CD3+                    | 0.009789695 | 0.001618377 | 0.455223374  | NA                | NA                   |
| m.i  | Bacteria;Firmicutes;Clostridia;Clostridiales;Lachnospir  | 6_CD27- CXCR3+ % CD25- CD4+                  | 0.022187263 | 0.005056654 | -0.437879106 | NA                | NA                   |
| m.i  | Bacteria;Firmicutes;Clostridia;Clostridiales;Lachnospir  | 6_CD27- CXCR3+ CD25- % CD4+                  | 0.022187263 | 0.005037161 | -0.437687603 | NA                | NA                   |
| m.i  | OTU_2                                                    | 1_CD4+ CD8+ %                                | 0.017434577 | 0.021424547 | 0.456170836  | NA                | NA                   |
| m.i  | OTU_2                                                    | 1_CD4+ CD8+ % CD3+                           | 0.01212587  | 0.026622781 | 0.464212091  | NA                | NA                   |
| m.i  | Bacteria;Bacteroidetes;Bacteroidia;Bacteroidales;Porp    | 5_CD25+ CD4+ CD8- CD3+ (ul)                  | 0.018807086 | 0.001858267 | -0.457457827 | NA                | DEPLETED-ENRICHED-NS |
| m.i  | Bacteria;Bacteroidetes;Bacteroidia;Bacteroidales;Porp    | 6_CD161+ CCR6+ CXCR3- CD25- CD4+ (ul)        | 0.029691083 | 0.000336263 | -0.430691462 | NA                | NA                   |
| m.i  | Bacteria;Firmicutes;Clostridia;Clostridiales;Ruminococ   | 3_CD123+ CD14- CD16- HLA-DR+ % CD4dim/-      | 0.039725561 | 0.013032154 | -0.412038882 | NA                | ENRICHED-NS-NS       |
| m.i  | Bacteria;Proteobacteria;Deltaproteobacteria;Desulfovit   | 9_IFNg+ TNFa- % Va7.2+ CD161 CD3+            | 0.001648522 | 0.036439957 | 0.507670455  | NA                | NA                   |
| m.i  | Bacteria;Firmicutes;Clostridia;Clostridiales;Lachnospir  | 6_CD161+ CCR6+ CXCR3- CD25+ % CD4+           | 0.019198431 | 0.000945568 | -0.439369343 | NA                | NA                   |
| m.i  | Bacteria;Firmicutes;Clostridia;Clostridiales;Lachnospir  | 5_CD25+ CD4+ % CD4high                       | 0.037499953 | 0.034777364 | -0.423145048 | NA                | DEPLETED-NS-NS       |
| m.i  | Bacteria;Firmicutes;Clostridia;Clostridiales;Lachnospir  | 6_CD25- % CD4+                               | 0.000227993 | 0.033742116 | 0.52997584   | NA                | ENRICHED-NS-ENRICHED |
| m.i  | Bacteria;Firmicutes;Clostridia;Clostridiales;Lachnospir  | 4_CD56dim CD16- CD3- (ul)                    | 0.013046453 | 0.018594556 | 0.448370732  | NA                | NA                   |
| m.i  | Bacteria;Firmicutes;Erysipelotrichia;Erysipelotrichales; | 10_IL-17a- IFNg- % TCRgd+ CD3+               | 0.014457874 | 0.015741563 | 0.446001735  | NA                | NA                   |
| m.i  | Bacteria;Firmicutes;Erysipelotrichia;Erysipelotrichales; | 10_IL-17a- IFNg+ % TCRgd+ CD3+               | 0.010442776 | 0.00990064  | -0.462236528 | NA                | NA                   |
| m.i  | Bacteria;Firmicutes;Erysipelotrichia;Erysipelotrichales; | 9_IL-17a- IFNg+ Va7.2+ CD161+ CD4- CD3+ (ul) | 0.026990443 | 0.005058713 | -0.431216799 | NA                | DEPLETED-NS-NS       |
| m.i  | Bacteria;Firmicutes;Clostridia;Clostridiales;Lachnospir  | 0_IL-17a+ IFNg+ TCRgd+ % CD3+                | 0.039967614 | 0.004043855 | -0.411882521 | ENRICHED-NS-NS    | NA                   |
| m.i  | Bacteria;Firmicutes;Clostridia;Clostridiales;Lachnospir  | 9_IL-17a- IFNg+ Va7.2+ CD161+ CD4- CD3+ (ul) | 0.041161227 | 0.008234013 | -0.411123982 | ENRICHED-NS-NS    | DEPLETED-NS-NS       |
| m.i  | Bacteria;Firmicutes;Clostridia;Clostridiales;Lachnospir  | 0_IL-17a+ IFNg+ TCRgd+ CD4- CD3+ (ul)        | 0.036889053 | 0.005545341 | -0.39569707  | ENRICHED-NS-NS    | DEPLETED-NS-NS       |
| m.i  | Bacteria;Firmicutes;Clostridia;Clostridiales;Lachnospir  | 9_IL-17a- IFNg+ Va7.2+ CD161+ CD4- CD3+ (ul) | 0.036663609 | 0.026308266 | -0.385001908 | ENRICHED-NS-NS    | DEPLETED-NS-NS       |
| m.i  | Bacteria;Firmicutes;Clostridia;Clostridiales;Lachnospir  | 9_IFNg+ TNFa- Va7.2+ CD161+ CD4- CD3+ (ul)   | 0.032967761 | 0.043659736 | -0.400422264 | ENRICHED-NS-NS    | DEPLETED-NS-NS       |
| m.i  | Bacteria;Actinobacteria;Actinobacteria;Bifidobacteriale  | 5_CD62L+ CD45RO- CD25+ CD4+ % CD4high CD8-   | 0.030523179 | 0.014879136 | 0.414037287  | NA                | NA                   |
| m.i  | Bacteria;Actinobacteria;Actinobacteria;Bifidobacteriale  | 9_IL-2+ TNFa+ % Va7.2+ CD161+ CD4- CD3+ (ul) | 0.030523179 | 0.001434    | -0.384079069 | NA                | DEPLETED-NS-NS       |
| m.i  | Bacteria;Actinobacteria;Actinobacteria;Bifidobacteriale  | 9_IL-2+ TNFa+ % Va7.2+ CD161 CD3+            | 0.030523179 | 0.000436106 | -0.383202107 | NA                | NA                   |
| m.i  | Bacteria;Actinobacteria;Actinobacteria;Bifidobacteriale  | 5_CD62L- CD45RO- % CD25+ CD4+ CD4high CD8-   | 0.049775569 | 0.034403904 | 0.340217283  | NA                | NA                   |
| m.i  | Bacteria;Actinobacteria;Actinobacteria;Bifidobacteriale  | 9_IL-2+ TNFa+ Va7.2+ CD161 % CD3+            | 0.030523179 | 0.001701753 | -0.384109305 | NA                | DEPLETED-NS-NS       |
| m.i  | Bacteria;Actinobacteria;Actinobacteria;Bifidobacteriale  | 5_CD62L- CD45RO- CD25+ CD4+ % CD4high CD8-   | 0.030523179 | 0.014316925 | 0.391546783  | NA                | NA                   |
| m.i  | Bacteria;Actinobacteria;Actinobacteria;Bifidobacteriale  | 5_CD62L+ CD45RO- % CD25+ CD4+ CD4high CD8-   | 0.030523179 | 0.006404294 | 0.38459761   | NA                | NA                   |
| m.i  | Bacteria;Cyanobacteria;Melainabacteria;Gastranaerop      | 7_IFNg+ IL-17a- IL-22+ CD4+ CD3+ (ul)        | 0.046058146 | 0.000426363 | 0.42154024   | NA                | NA                   |
| m.i  | OTU_52                                                   | 6_CD27- CD161+ CCR6+ CXCR3- % CD25- CD4+     | 0.00642558  | 0.034245412 | 0.462939087  | NA                | NA                   |
| m.i  | OTU_52                                                   | 6_CD27- CD161+ CCR6+ % CXCR3- CD25- CD4+     | 0.006371604 | 0.029384262 | 0.463124255  | NA                | NA                   |
| m.i  | OTU_52                                                   | 6_CD27- CD161+ CCR6+ CXCR3- CD25- % CD4+     | 0.005958579 | 0.037227673 | 0.464591568  | NA                | NA                   |
| m.i  | OTU_47                                                   | 6_CD27dim % CD161+ CCR6+ CXCR3- CD25- CD4+   | 0.027452157 | 0.007699834 | -0.431802359 | NA                | NA                   |
| m.i  | Bacteria;Firmicutes;Clostridia;Clostridiales;Ruminococ   | 3_CD123+ CD14- CD16- HLA-DR+ % CD4dim/-      | 0.030948792 | 0.016001359 | -0.427882449 | NA                | ENRICHED-NS-NS       |
| m.i  | Bacteria;Firmicutes;Negativicutes;Selenomonadales;V      | 6_CD27- CD161+ CCR6+ CXCR3- % CD25- CD4+     | 0.000887577 | 0.004154731 | -0.502856236 | NA                | NA                   |
| m.i  | Bacteria;Firmicutes;Negativicutes;Selenomonadales;V      | 6_CD27- % CD25- CD4+                         | 0.013736636 | 0.014387905 | -0.438262974 | NA                | NS-DEPLETED-NS       |
| m.i  | Bacteria;Firmicutes;Negativicutes;Selenomonadales;V      | 6_CD27- CD25- CD4+ (ul)                      | 0.029614164 | 0.044298388 | -0.41951004  | NA                | NA                   |
| m.i  | Bacteria;Firmicutes;Negativicutes;Selenomonadales;V      | 6_CD27- CD161+ CCR6+ CXCR3- CD25- CD4+ (ul)  | 0.002184367 | 0.043327634 | -0.47914407  | NA                | NA                   |
| m.i  | Bacteria;Firmicutes;Negativicutes;Selenomonadales;V      | 6_CD27- CD25- % CD4+                         | 0.015969853 | 0.012182441 | -0.43467103  | NA                | ENRICHED-DEPLETED-NS |
| m.i  | Bacteria;Firmicutes;Negativicutes;Selenomonadales;V      | 6_CD27- CD161+ CCR6+ CXCR3- CD25- % CD4+     | 0.000887577 | 0.004610976 | -0.498387023 | NA                | NA                   |
| m.i  | Bacteria;Firmicutes;Negativicutes;Selenomonadales;V      | 6_CD27- CD161+ CCR6+ % CXCR3- CD25- CD4+     | 0.000887577 | 0.005656087 | -0.500526472 | NA                | NA                   |
| m.i  | Bacteria;Proteobacteria;Deltaproteobacteria;Desulfovit   | 1_CD19+ %                                    | 0.034831528 | 0.01040249  | -0.443388707 | NA                | DEPLETED-ENRICHED-NS |
| m.i  | Bacteria;Firmicutes;Erysipelotrichia;Erysipelotrichales  | 2_CD39+ CD31- % CD25high CD127low CD4+       | 0.044363032 | 0.010267073 | 0.437693757  | NS-DEPLETED-NS    | NA                   |

Table S7

| Test | Feature1                                                 | Feature2                                   | CORONA_Q    | CORONA_LRP  | CORONA_R     | Feature1CORONA | Feature2CORONA             |
|------|----------------------------------------------------------|--------------------------------------------|-------------|-------------|--------------|----------------|----------------------------|
| m.i  | Bacteria;Firmicutes;Erysipelotrichia;Erysipelotrichales  | 2_FoxP3+ CD39+ % CD25high CD127low CD4+    | 0.046390648 | 0.013672857 | 0.419669986  | NS-DEPLETED-NS | NA                         |
| m.i  | Bacteria;Firmicutes;Clostridia;Clostridiales;Ruminococ   | 5_CD62L- CD45RO- % CD8+ CD4-               | 0.012710262 | 0.041381918 | -0.448970026 | NA             | ENRICHED-NS-NS             |
| m.i  | Bacteria;Proteobacteria;Gammaproteobacteria              | 10_CD69+ % Va7.2+ CD161+ CD4- CD8- CD3+    | 0.03469261  | 0.037420103 | 0.411074349  | NA             | NA                         |
| m.i  | Bacteria;Proteobacteria;Gammaproteobacteria              | 5_CD24- CD45RO- CD25+ CD4+ CD8- CD3+ (ul)  | 0.028114043 | 0.028571333 | 0.432013786  | NA             | DEPLETED-ENRICHED-NS       |
| m.i  | OTU_70                                                   | 6_Th17/Treg                                | 0.002629448 | 0.033964596 | 0.496006478  | NS-DEPLETED-NS | NA                         |
| m.i  | OTU_70                                                   | 6_CD161- CCR6- CXCR3- CD25+ CD4+ (ul)      | 0.000948994 | 0.001401285 | -0.518035001 | NS-DEPLETED-NS | DEPLETED-ENRICHED-DEPLETED |
| m.i  | OTU_70                                                   | 0_TCRgd+ % CD3+                            | 0.036715942 | 0.039591941 | -0.439019158 | NS-DEPLETED-NS | NA                         |
| m.i  | Bacteria;Firmicutes;Clostridia;Clostridiales;Peptostrept | 8_TNFa+ IL-2- IL-17a+ CD4+ CD3+ (ul)       | 0.02636537  | 0.023888112 | -0.423654975 | NA             | DEPLETED-ENRICHED-NS       |
| m.i  | Bacteria;Firmicutes;Clostridia;Clostridiales;Peptostrept | 8_TNFa+ IL-2- IL-17a+ % CD3+               | 0.013198341 | 0.001801362 | -0.465271763 | NA             | DEPLETED-NS-NS             |
| m.i  | OTU_99                                                   | 2_CD39+ CD31+ % CD25high CD127low CD4+     | 0.001799645 | 0.006479076 | 0.50342543   | NA             | NA                         |
| m.i  | OTU_99                                                   | 7_Helios+ Ki67+ CD4+ CD3+ (ul)             | 0.011017715 | 0.032170304 | -0.466301195 | NA             | NA                         |
| m.i  | OTU_99                                                   | 7_Foxp3+ Ki67+ CD4+ CD3+ (ul)              | 0.019215174 | 0.004608892 | -0.453982646 | NA             | NA                         |
| m.i  | OTU_99                                                   | 8_TNFa+ IL-5+ IL-17a+ CD4+ CD3+ (ul)       | 0.037415215 | 0.022300353 | -0.438572536 | NA             | DEPLETED-ENRICHED-NS       |
| m.i  | OTU_99                                                   | 7_Helios- Ki67+ CD4+ CD3+ (ul)             | 0.000381622 | 8.90708E-05 | -0.53441778  | NA             | NA                         |
| m.i  | OTU_99                                                   | 1_CD4+ CD8- CD3+ (ul)                      | 0.000925239 | 0.043751357 | -0.516035896 | NA             | DEPLETED-ENRICHED-NS       |
| m.i  | OTU_99                                                   | 7_FoxP3- Ki67- CD4+ CD3+ (ul)              | 0.047642718 | 0.03291028  | -0.415626294 | NA             | DEPLETED-ENRICHED-NS       |
| m.i  | OTU_99                                                   | 7_IL-17a+ IL-22- CD4+ CD3+ (ul)            | 0.02068569  | 0.037767796 | -0.45231331  | NA             | NA                         |
| m.i  | OTU_99                                                   | 8_TNFa+ IL-2- % IL-17a+ CD3+               | 0.015561719 | 0.004747672 | -0.442904761 | NA             | NA                         |
| m.i  | OTU_99                                                   | 7_IFNg- IL-17a+ CD4+ CD3+ (ul)             | 0.00511982  | 0.012214851 | -0.482534049 | NA             | NA                         |
| m.i  | OTU_99                                                   | 7_Helios- IFNg- CD4+ CD3+ (ul)             | 0.00343205  | 0.031297334 | -0.490688851 | NA             | NS-ENRICHED-NS             |
| m.i  | OTU_99                                                   | 2_FoxP3+ CD39+ % CD25high CD127low CD4+    | 0.025584781 | 0.012148436 | 0.447452404  | NA             | NA                         |
| m.i  | OTU_99                                                   | 7_FoxP3- Ki67+ CD4+ CD3+ (ul)              | 0.005235182 | 0.000891133 | -0.482073542 | NA             | NA                         |
| m.i  | OTU_99                                                   | 8_IL-10- IL-2- IL-17a- CD4+ CD3+ (ul)      | 0.005726659 | 0.030275309 | -0.480212329 | NA             | DEPLETED-ENRICHED-NS       |
| m.i  | OTU_99                                                   | 8_GM-CSF- IL-2- IL-17a- CD4+ CD3+ (ul)     | 0.005627118 | 0.028084714 | -0.480576896 | NA             | DEPLETED-ENRICHED-NS       |
| m.i  | OTU_99                                                   | 7_IL-17a+ Ki67- CD4+ CD3+ (ul)             | 0.010606658 | 0.039918089 | -0.467126269 | NA             | NA                         |
| m.i  | OTU_99                                                   | 5_CD8_Tem/Tcm                              | 0.048708762 | 0.041186255 | -0.43226209  | NA             | NA                         |
| m.i  | OTU_99                                                   | 7_FoxP3- Helios- CD4+ CD3+ (ul)            | 0.028363744 | 0.009913604 | -0.428558851 | NA             | DEPLETED-ENRICHED-NS       |
| m.i  | OTU_99                                                   | 7_Helios+ IFNg- CD4+ CD3+ (ul)             | 0.00698019  | 0.012099386 | -0.47606777  | NA             | NS-DEPLETED-NS             |
| m.i  | OTU_61                                                   | 8_TNFa- IL-5+ % IL-17a- CD3+               | 0.007111729 | 0.039803383 | 0.475674083  | NA             | NA                         |
| m.i  | OTU_61                                                   | 9_IL-2+ TNFa- Va7.2+ CD161+ CD4- CD3+ (ul) | 0.001273033 | 0.000170179 | 0.510050196  | NA             | NA                         |
| m.i  | OTU_61                                                   | 9_IL-2+ TNFa- % Va7.2+ CD161 CD3+          | 0.001144514 | 0.000191163 | 0.512059099  | NA             | NA                         |
| m.i  | OTU_61                                                   | 9_IL-2+ TNFa- Va7.2+ CD161 % CD3+          | 0.002748338 | 0.000306673 | 0.495129835  | NA             | NA                         |
| m.i  | OTU_61                                                   | 8_TNFa- IL-5+ IL-17a- % CD3+               | 0.004900437 | 0.033347036 | 0.48343722   | NA             | NA                         |
| m.i  | Bacteria;Firmicutes;Clostridia                           | 9_IFNg+ TNFa- % Va7.2+ CD161 CD3+          | 0.030764393 | 0.024981105 | 0.397172604  | NA             | NA                         |
| m.i  | Bacteria;Firmicutes;Clostridia                           | Monocytes %                                | 0.030764393 | 0.028285886 | -0.382934941 | NA             | ENRICHED-DEPLETED-NS       |
| m.i  | Bacteria;Firmicutes;Clostridia                           | 6_CD27- CXCR3+ % CD25- CD4+                | 0.023866754 | 0.030938982 | -0.413282651 | NA             | NA                         |
| m.i  | Bacteria;Firmicutes;Clostridia                           | 6_Th1/2_Treg                               | 0.006433199 | 0.001688953 | -0.477427367 | NA             | NA                         |
| m.i  | Bacteria;Firmicutes;Clostridia                           | 6_CD27- CXCR3+ CD25- % CD4+                | 0.023866754 | 0.033034587 | -0.413305989 | NA             | NA                         |
| m.i  | Bacteria;Firmicutes;Clostridia                           | 1_CD11c+ CD14+ CD3- CD19- %                | 0.030764393 | 0.025279355 | -0.384018384 | NA             | ENRICHED-DEPLETED-NS       |
| m.i  | Bacteria;Firmicutes;Clostridia                           | 6_Th17/Th1                                 | 0.003465004 | 0.003472293 | 0.493169808  | NA             | NA                         |
| m.i  | Bacteria;Firmicutes;Clostridia                           | 6_CXCR3- CD25- % CD4+                      | 0.030764393 | 0.018566977 | 0.388494574  | NA             | NA                         |
| m.i  | Bacteria;Firmicutes;Clostridia;Clostridiales;Peptostrept | 6_CD25- % CD4+                             | 0.01417771  | 0.03719219  | -0.445339057 | NA             | ENRICHED-NS-ENRICHED       |
| m.i  | Bacteria;Firmicutes;Clostridia;Clostridiales;Peptostrept | 5_CD4_Tem/Treg                             | 0.019040635 | 0.017809447 | -0.421629341 | NA             | ENRICHED-NS-NS             |
| m.i  | Bacteria;Firmicutes;Clostridia;Clostridiales;Peptostrept | 6_CXCR3- CD25+ % CD4+                      | 0.01417771  | 0.043847128 | 0.431807019  | NA             | DEPLETED-NS-DEPLETED       |
| m.i  | Bacteria;Firmicutes;Clostridia;Clostridiales;Lachnospir  | 5_CD24- CD45RO+ CD25- CD4+ CD8- CD3+ (ul)  | 0.010706812 | 0.023091953 | 0.454545644  | NA             | NA                         |
| m.i  | Bacteria;Firmicutes;Clostridia;Clostridiales             | 9_IFNg+ TNFa- % Va7.2+ CD161 CD3+          | 0.005027116 | 0.003677753 | 0.466646694  | NA             | NA                         |
| m.i  | Bacteria;Firmicutes;Clostridia;Clostridiales             | 6_CD27- % CXCR3+ CD25- CD4+                | 0.013771647 | 0.026485109 | -0.399090663 | NA             | NA                         |
| m.i  | Bacteria;Firmicutes;Clostridia;Clostridiales             | 4_CD8+ CD4+ % CD56+ CD3+                   | 0.030139074 | 0.026783115 | -0.369991798 | NA             | NA                         |
| m.i  | Bacteria;Firmicutes;Clostridia;Clostridiales             | 1_CD3+ %                                   | 0.027697538 | 0.032099219 | 0.374347935  | NA             | DEPLETED-ENRICHED-NS       |
| m.i  | Bacteria;Firmicutes;Clostridia;Clostridiales             | 9_IFNg+ TNFa- Va7.2+ CD161+ CD4- CD3+ (ul) | 0.006594255 | 0.013842783 | 0.430705313  | NA             | DEPLETED-NS-NS             |
| m.i  | Bacteria;Firmicutes;Clostridia;Clostridiales             | Monocytes %                                | 0.005027116 | 0.00256767  | -0.450913098 | NA             | ENRICHED-DEPLETED-NS       |
| m.i  | Bacteria;Firmicutes;Clostridia;Clostridiales             | 6_CD27- CXCR3+ % CD25- CD4+                | 0.006441699 | 0.033930767 | -0.438062358 | NA             | NA                         |
| m.i  | Bacteria;Firmicutes;Clostridia;Clostridiales             | 6_CD27- CXCR3+ CD25- % CD4+                | 0.006441699 | 0.037514076 | -0.437306425 | NA             | NA                         |
| m.i  | Bacteria;Firmicutes;Clostridia;Clostridiales             | 6_Th1/2_Treg                               | 0.006594255 | 0.011964802 | -0.442822003 | NA             | NA                         |

Table S7

| Test | Feature1                                                 | Feature2                                     | CORONA_Q    | CORONA_LRP  | CORONA_R     | Feature1CORONA | Feature2CORONA             |
|------|----------------------------------------------------------|----------------------------------------------|-------------|-------------|--------------|----------------|----------------------------|
| m.i  | Bacteria;Firmicutes;Clostridia;Clostridiales             | 1_CD11c+ CD14+ % CD3- CD19-                  | 0.011423    | 0.017657446 | -0.411531052 | NA             | NA                         |
| m.i  | Bacteria;Firmicutes;Clostridia;Clostridiales             | 3_CD14hi CD16- % HLA-DR+ CD16+/HLA-DR- CD16- | 0.049586128 | 0.016198977 | -0.349408963 | NA             | ENRICHED-DEPLETED-NS       |
| m.i  | Bacteria;Firmicutes;Clostridia;Clostridiales             | 1_CD11c+ CD14+ CD3- CD19- %                  | 0.005027116 | 0.002282923 | -0.450961355 | NA             | ENRICHED-DEPLETED-NS       |
| m.i  | Bacteria;Firmicutes;Clostridia;Clostridiales             | 6_Th17/Th1                                   | 0.005027116 | 0.022474791 | 0.467338032  | NA             | NA                         |
| m.i  | Bacteria;Firmicutes;Clostridia;Clostridiales             | 3_CD14hi CD16- HLA-DR+ CD16+/HLA-DR- CD16-%  | 0.041901717 | 0.007680491 | -0.356015757 | NA             | ENRICHED-DEPLETED-NS       |
| m.i  | Bacteria;Firmicutes;Clostridia;Clostridiales             | 6_CXCR3- CD25- % CD4+                        | 0.030139074 | 0.044778579 | 0.368799274  | NA             | NA                         |
| m.i  | Bacteria;Firmicutes;Clostridia;Clostridiales             | 9_IFNg+ TNFa- Va7.2+ CD161 % CD3+            | 0.013771647 | 0.035792423 | 0.399193943  | NA             | DEPLETED-NS-NS             |
| m.i  | Bacteria;Cyanobacteria                                   | 7_IL-17a- IL-22+ CD4+ CD3+ (ul)              | 0.047449568 | 0.011535932 | 0.373016821  | NA             | NA                         |
| m.i  | Bacteria;Cyanobacteria                                   | 7_IFNg+ IL-17a- IL-22+ CD4+ CD3+ (ul)        | 0.026861752 | 0.000126663 | 0.449395439  | NA             | NA                         |
| m.i  | Bacteria;Cyanobacteria                                   | 7_IFNg+ IL-17a- IL-22+ % CD3+                | 0.040062089 | 0.000784553 | 0.405635085  | NA             | NA                         |
| m.i  | OTU_51                                                   | 4_CD56+ CD3+ %                               | 0.032666647 | 0.000577719 | -0.429587352 | NA             | NA                         |
| m.i  | Bacteria;Firmicutes;Clostridia;Clostridiales;Lachnospir: | 5_CD24+ CD4high CD8dim % CD4+ CD8            | 0.046352064 | 0.016960892 | 0.395663069  | NA             | NS-ENRICHED-NS             |
| m.i  | Bacteria;Firmicutes;Clostridia;Clostridiales;Ruminococ:  | 6_Th17/Th1                                   | 0.032429267 | 0.016875941 | 0.445052058  | NA             | NA                         |
| m.i  | Bacteria;Firmicutes;Clostridia;Clostridiales;Lachnospir: | 9_IL-17a+ TNFa+ Va7.2+ CD161+ CD4- CD3+ (ul) | 0.017879573 | 0.000245032 | 0.441247658  | NA             | NA                         |
| m.i  | Bacteria;Firmicutes;Clostridia;Clostridiales;Lachnospir: | 9_IL-17a+ TNFa+ Va7.2+ CD161 % CD3+          | 0.049827304 | 0.000761264 | 0.41600122   | NA             | NA                         |
| m.i  | Bacteria;Firmicutes;Clostridia;Clostridiales;Lachnospir: | 6_CXCR3- % CD25- CD4+                        | 0.048024797 | 0.00164912  | 0.416936357  | NA             | NA                         |
| m.i  | Bacteria;Firmicutes;Clostridia;Clostridiales;Lachnospir: | 6_CXCR3- CD25- % CD4+                        | 0.017879573 | 0.001672003 | 0.441047777  | NA             | NA                         |
| m.i  | Bacteria;Firmicutes;Clostridia;Clostridiales;Lachnospir: | 6_CXCR3+ CD25- % CD4+                        | 0.049538147 | 0.001849674 | -0.416149115 | NA             | NA                         |
| m.i  | Bacteria;Firmicutes;Clostridia;Clostridiales;Lachnospir: | 6_CXCR3+ % CD25- CD4+                        | 0.047264345 | 0.00160285  | -0.417340605 | NA             | NA                         |
| m.i  | Bacteria;Bacteroidetes;Bacteroidia;Bacteroidales         | 3_CD14hi CD16- HLA-DR+ CD16+/HLA-DR- CD16-%  | 0.046753239 | 0.022685166 | 0.35880186   | NA             | ENRICHED-DEPLETED-NS       |
| m.i  | Bacteria;Bacteroidetes;Bacteroidia;Bacteroidales         | 6_Th17/Th1                                   | 0.008551745 | 0.012010931 | -0.474593899 | NA             | NA                         |
| m.i  | Bacteria;Bacteroidetes;Bacteroidia;Bacteroidales         | 3_CD14hi CD16- % HLA-DR+ CD16+/HLA-DR- CD16- | 0.047442091 | 0.034266557 | 0.356290177  | NA             | ENRICHED-DEPLETED-NS       |
| m.i  | Bacteria;Bacteroidetes;Bacteroidia;Bacteroidales         | 6_CD27dim CXCR3+ % CD25- CD4+                | 0.015378275 | 0.026190654 | 0.424355783  | NA             | NA                         |
| m.i  | Bacteria;Bacteroidetes;Bacteroidia;Bacteroidales         | 4_CD8+ CD4+ % CD56+ CD3+                     | 0.016784745 | 0.020197484 | 0.416203434  | NA             | NA                         |
| m.i  | Bacteria;Bacteroidetes;Bacteroidia;Bacteroidales         | 9_IFNg+ TNFa- Va7.2+ CD161+ CD4- CD3+ (ul)   | 0.025005    | 0.039334234 | -0.388726252 | NA             | DEPLETED-NS-NS             |
| m.i  | Bacteria;Bacteroidetes;Bacteroidia;Bacteroidales         | 9_IFNg+ TNFa- % Va7.2+ CD161 CD3+            | 0.01287847  | 0.003176409 | -0.440960803 | NA             | NA                         |
| m.i  | Bacteria;Bacteroidetes;Bacteroidia;Bacteroidales         | 6_CD27dim CXCR3+ CD25- % CD4+                | 0.016784745 | 0.035487074 | 0.413680849  | NA             | NA                         |
| m.i  | Bacteria;Bacteroidetes;Bacteroidia;Bacteroidales         | 6_CD27- CXCR3+ % CD25- CD4+                  | 0.02110829  | 0.041070339 | 0.400737085  | NA             | NA                         |
| m.i  | Bacteria;Bacteroidetes;Bacteroidia;Bacteroidales         | 6_Th1/2_Treg                                 | 0.01287847  | 0.019012519 | 0.456007475  | NA             | NA                         |
| m.i  | Bacteria;Bacteroidetes;Bacteroidia;Bacteroidales         | 6_CD27- CXCR3+ CD25- % CD4+                  | 0.02110829  | 0.046005093 | 0.400384274  | NA             | NA                         |
| m.i  | Bacteria;Bacteroidetes;Bacteroidia                       | 9_IFNg+ TNFa- % Va7.2+ CD161 CD3+            | 0.046440739 | 0.007334219 | -0.382755733 | NA             | NA                         |
| m.i  | Bacteria;Bacteroidetes;Bacteroidia                       | 6_Th1/2_Treg                                 | 0.033438016 | 0.03082408  | 0.435402825  | NA             | NA                         |
| m.i  | Bacteria;Bacteroidetes;Bacteroidia                       | 6_CD27- CXCR3+ CD25- % CD4+                  | 0.033438016 | 0.045008971 | 0.395529489  | NA             | NA                         |
| m.i  | Bacteria;Bacteroidetes;Bacteroidia                       | 6_CD27- CXCR3+ % CD25- CD4+                  | 0.033438016 | 0.039165599 | 0.395772942  | NA             | NA                         |
| m.i  | OTU_81                                                   | 0_IL-17a- IL-22+ TCRgd+ % CD3+               | 0.000385944 | 1.70455E-05 | -0.534220405 | NA             | NA                         |
| m.i  | OTU_81                                                   | 0_IL-17a- IL-22+ TCRgd+ CD4- CD3+ (ul)       | 0.005603095 | 8.16495E-05 | -0.480665781 | NA             | NA                         |
| m.i  | OTU_81                                                   | 1_CD4- CD8+ %                                | 0.021545671 | 0.001950203 | 0.451387484  | NA             | NA                         |
| m.i  | Bacteria;Firmicutes;Clostridia;Clostridiales;Ruminococ:  | 4_TCRgd+ % CD4- CD8- CD3+                    | 0.049014649 | 0.006101959 | -0.435316369 | NA             | ENRICHED-DEPLETED-NS       |
| m.i  | Bacteria;Bacteroidetes;Bacteroidia;Bacteroidales;Prev:   | 6_CXCR3+ CD25+ % CD4+                        | 0.02126631  | 0.022047966 | 0.43714956   | NA             | NA                         |
| m.i  | Bacteria;Bacteroidetes;Bacteroidia;Bacteroidales;Prev:   | 6_CXCR3+ % CD25+ CD4+                        | 0.023324013 | 0.028157108 | 0.425457171  | NA             | NA                         |
| m.i  | Bacteria;Bacteroidetes;Bacteroidia;Bacteroidales;Prev:   | 6_CXCR3- % CD25+ CD4+                        | 0.022073453 | 0.027754275 | -0.426814234 | NA             | NA                         |
| m.i  | Bacteria;Bacteroidetes;Bacteroidia;Bacteroidales;Prev:   | 6_CXCR3+ CD25+ CD4+ (ul)                     | 0.026979097 | 0.042601199 | 0.421844322  | NA             | NA                         |
| m.i  | Bacteria;Proteobacteria;Deltaproteobacteria              | 6_CXCR3- CD25+ CD4+ (ul)                     | 0.002321965 | 0.002855364 | -0.472840886 | NA             | DEPLETED-ENRICHED-DEPLETED |
| m.i  | Bacteria;Proteobacteria;Deltaproteobacteria              | 6_CD25+ CD4+ (ul)                            | 0.00180955  | 0.007322962 | -0.484073294 | NA             | DEPLETED-ENRICHED-NS       |
| m.i  | Bacteria;Proteobacteria;Deltaproteobacteria              | 6_CD161- CCR6- CXCR3- CD25+ CD4+ (ul)        | 0.00127999  | 0.003064719 | -0.512461743 | NA             | DEPLETED-ENRICHED-DEPLETED |
| m.i  | Bacteria;Proteobacteria;Deltaproteobacteria              | 6_CD25+ CD4+ (ul)2                           | 0.00180955  | 0.007322962 | -0.484073294 | NA             | DEPLETED-ENRICHED-NS       |
| m.i  | Bacteria;Proteobacteria;Deltaproteobacteria              | 6_CD161- CCR6- CXCR3- CD25- CD4+ (ul)        | 0.012603481 | 0.045137859 | -0.423142355 | NA             | DEPLETED-ENRICHED-NS       |
| m.i  | Bacteria;Firmicutes;Clostridia;Clostridiales;Lachnospir: | 8_IL-10- IL-2- % IL-17a+ CD3+                | 0.006627874 | 0.004509716 | -0.46579588  | NA             | NA                         |
| m.i  | OTU_74                                                   | 9_IL-17a+ TNFa+ Va7.2+ CD161 % CD3+          | 0.003532997 | 3.78991E-05 | 0.490104764  | NA             | NA                         |
| m.i  | OTU_74                                                   | 9_IL-17a+ TNFa+ Va7.2+ CD161+ CD4- CD3+ (ul) | 0.00480391  | 4.85013E-05 | 0.483846651  | NA             | NA                         |
| m.i  | OTU_74                                                   | 6_CD27- CD161+ CCR6+ CXCR3- CD25- CD4+ (ul)  | 0.002916383 | 0.024395882 | 0.493949536  | NA             | NA                         |
| m.i  | OTU_74                                                   | 9_IL-17a+ TNFa+ % Va7.2+ CD161 CD3+          | 0.000429459 | 3.91504E-06 | 0.53234188   | NA             | NA                         |
| m.i  | OTU_40                                                   | 7_IFNg+ IL-17a- IL-22+ CD4+ CD3+ (ul)        | 0.033480617 | 0.000157157 | 0.444310489  | NA             | NA                         |
| m.i  | OTU_107                                                  | 5_CD24+ CD45RO+ % CD8+ CD4-                  | 0.006587027 | 0.004465507 | 0.477287213  | NA             | NS-ENRICHED-ENRICHED       |

Table S7

| Test | Feature1                                                 | Feature2                                  | CORONA_Q    | CORONA_LRP  | CORONA_R     | Feature1CORONA | Feature2CORONA             |
|------|----------------------------------------------------------|-------------------------------------------|-------------|-------------|--------------|----------------|----------------------------|
| m.i  | OTU_107                                                  | 5_CD24+ CD45RO+ CD8+ CD4- CD3+ (ul)       | 0.003763083 | 0.003032399 | 0.491429312  | NA             | NS-ENRICHED-ENRICHED       |
| m.i  | Bacteria;Firmicutes;Clostridia;Clostridiales;Christenser | 6_CD161- CCR6- CXCR3- CD25+ CD4+ (ul)     | 0.033014094 | 0.024838477 | -0.40876466  | NA             | DEPLETED-ENRICHED-DEPLETED |
| m.i  | OTU_42                                                   | 6_CD27dim CXCR3+ CD25- % CD4+             | 0.015316045 | 0.00291441  | -0.459063048 | NA             | NA                         |
| m.i  | OTU_42                                                   | 6_CD161- CCR6+ CXCR3- % CD25- CD4+        | 0.008080172 | 0.045865994 | -0.472968826 | NA             | NA                         |
| m.i  | OTU_42                                                   | 4_CD56high CD16+ % CD3-                   | 0.011184042 | 0.012291024 | 0.455463743  | NA             | NA                         |
| m.i  | OTU_42                                                   | 4_CD56high CD16- % CD3-                   | 0.000716111 | 0.008549385 | 0.520760858  | NA             | NA                         |
| m.i  | OTU_42                                                   | 6_CD161- CCR6+ % CXCR3- CD25- CD4+        | 0.007513584 | 0.026725411 | -0.474512143 | NA             | NA                         |
| m.i  | OTU_42                                                   | 4_CD56high CD16+ CD3- %                   | 0.011184042 | 0.012291024 | 0.455463743  | NA             | NA                         |
| m.i  | OTU_42                                                   | 6_CD27dim CXCR3+ % CD25- CD4+             | 0.027825413 | 0.003551588 | -0.445512048 | NA             | NA                         |
| m.i  | OTU_42                                                   | 4_CD56high CD16- CD3- %                   | 0.000716111 | 0.008549385 | 0.520760858  | NA             | NA                         |
| m.i  | OTU_42                                                   | 6_CD161- CCR6+ CXCR3- CD25- % CD4+        | 0.005319404 | 0.037153206 | -0.481743296 | NA             | NA                         |
| m.i  | Bacteria;Proteobacteria;Alphaproteobacteria;Rhodospir    | 4_CD56high CD16+ CD3- %                   | 0.016494742 | 0.041289869 | 0.442936267  | NA             | NA                         |
| m.i  | Bacteria;Proteobacteria;Alphaproteobacteria;Rhodospir    | 4_CD56high CD16+ % CD3-                   | 0.016494742 | 0.041289869 | 0.442936267  | NA             | NA                         |
| m.i  | Bacteria;Firmicutes;Clostridia;Clostridiales;Lachnospir  | 8_IL-10- IL-2- % IL-17a+ CD3+             | 0.008292939 | 0.004480472 | -0.475243868 | ENRICHED-NS-NS | NA                         |
| m.i  | Bacteria;Firmicutes;Clostridia;Clostridiales;Lachnospir  | 6_CD161- CCR6- CXCR3- CD25+ CD4+ (ul)     | 0.041061641 | 0.013904573 | -0.394138126 | ENRICHED-NS-NS | DEPLETED-ENRICHED-DEPLETED |
| m.i  | Bacteria;Firmicutes;Clostridia;Clostridiales;Lachnospir  | 5_CD62L- CD45RO+ % CD8+ CD4-              | 0.002098061 | 0.002328091 | -0.503035713 | NA             | NA                         |
| m.i  | Bacteria;Firmicutes;Clostridia;Clostridiales;Lachnospir  | 2_FoxP3+ CD31- % CD25high CD127low CD4+   | 0.045112474 | 0.008573272 | 0.424210635  | NA             | NA                         |
| m.i  | OTU_71                                                   | 5_CD24+ CD45RO- CD25+ CD4+ % CD4high CD8- | 0.030997073 | 0.002986928 | 0.442999833  | NA             | NA                         |
| m.i  | OTU_71                                                   | 5_CD24+ CD45RO- % CD25+ CD4+ CD4high CD8- | 0.008421531 | 0.001372484 | 0.474918589  | NA             | NA                         |
| m.i  | OTU_71                                                   | 5_CD24+ CD45RO- CD25+ CD4+ CD8- CD3+ (ul) | 0.025214691 | 0.003422296 | 0.447787985  | NA             | NA                         |
| m.i  | OTU_50                                                   | 2_FoxP3- % CD25high CD127low CD4+         | 0.039952067 | 0.003338809 | 0.44017186   | NA             | NA                         |
| m.i  | Bacteria;Actinobacteria;Actinobacteria;Actinomycetales   | 10_CD69+ Va7.2+ CD161+ CD4- CD8- % CD3+   | 0.048287231 | 0.000552205 | 0.408800551  | NA             | NA                         |
| m.i  | OTU_35                                                   | 4_CD8- CD4- CD56+ CD3+ %                  | 0.017684193 | 0.046480565 | -0.458829915 | NA             | NA                         |
| m.i  | Bacteria;Proteobacteria;Deltaproteobacteria;Desulfovivi  | 6_CD25+ CD4+ (ul)2                        | 0.004669304 | 0.00263892  | -0.452591859 | NA             | DEPLETED-ENRICHED-NS       |
| m.i  | Bacteria;Proteobacteria;Deltaproteobacteria;Desulfovivi  | 6_Th17/Treg                               | 0.004669304 | 0.040904431 | 0.466516843  | NA             | NA                         |
| m.i  | Bacteria;Proteobacteria;Deltaproteobacteria;Desulfovivi  | 6_CD161- CCR6- CXCR3- CD25+ CD4+ (ul)     | 0.000133138 | 0.001312311 | -0.552337774 | NA             | DEPLETED-ENRICHED-DEPLETED |
| m.i  | Bacteria;Proteobacteria;Deltaproteobacteria;Desulfovivi  | 6_CD25+ CD4+ (ul)                         | 0.004669304 | 0.00263892  | -0.452591859 | NA             | DEPLETED-ENRICHED-NS       |
| m.i  | Bacteria;Proteobacteria;Deltaproteobacteria;Desulfovivi  | 6_CXCR3- CD25+ CD4+ (ul)                  | 0.007209373 | 0.002640678 | -0.438293351 | NA             | DEPLETED-ENRICHED-DEPLETED |
| m.i  | Bacteria;Bacteroidetes                                   | 6_Th1/2_Treg                              | 0.039886075 | 0.027162378 | 0.434261006  | NA             | NA                         |
| m.i  | Bacteria;Bacteroidetes                                   | 6_Th17/Th1                                | 0.039886075 | 0.033145848 | -0.439360906 | NA             | NA                         |
| m.i  | OTU_135                                                  | 7_Helios- Ki67- CD4+ CD3+ (ul)            | 0.014554089 | 0.027951645 | 0.444627247  | NA             | NS-ENRICHED-NS             |
| m.i  | OTU_135                                                  | 5_CD4+ CD8+ %                             | 0.007085947 | 0.020732387 | -0.475750708 | NA             | NA                         |
| m.i  | OTU_135                                                  | 2_CD39+ CD31+ % CD25high CD127low CD4+    | 0.025416363 | 0.028467012 | -0.431229256 | NA             | NA                         |
| m.i  | OTU_135                                                  | 8_TNFa+ IL-5- % IL-17a- CD3+              | 0.02225601  | 0.023534867 | 0.450648294  | NA             | DEPLETED-NS-DEPLETED       |
| m.i  | OTU_135                                                  | 6_CXCR3+ CD25- CD4+ (ul)                  | 0.030812038 | 0.006606182 | 0.443139695  | NA             | NA                         |
| m.i  | OTU_135                                                  | 7_IL-17a- IL-22- CD4+ CD3+ (ul)           | 0.011450741 | 0.03616366  | 0.449995371  | NA             | DEPLETED-ENRICHED-NS       |
| m.i  | OTU_135                                                  | 7_IL-17a- Ki67- CD4+ CD3+ (ul)            | 0.020486566 | 0.042029398 | 0.436413371  | NA             | NS-ENRICHED-NS             |
| m.i  | OTU_135                                                  | 7_IFNg- IL-17a- CD4+ CD3+ (ul)            | 0.010963898 | 0.037003143 | 0.450987073  | NA             | DEPLETED-ENRICHED-NS       |
| m.i  | OTU_135                                                  | 4_CD8- CD4+ CD56+ CD3+ %                  | 0.02298343  | 0.033524231 | -0.449913703 | NA             | NA                         |
| m.i  | OTU_135                                                  | 7_FoxP3- Ki67- CD4+ CD3+ (ul)             | 0.047642718 | 0.019703498 | 0.42455607   | NA             | DEPLETED-ENRICHED-NS       |
| m.i  | OTU_135                                                  | 2_FoxP3+ CD39- % CD25high CD127low CD4+   | 0.038087764 | 0.044063992 | 0.421272144  | NA             | NA                         |
| m.i  | OTU_135                                                  | 8_TNFa+ IL-2- IL-17a- CD4+ CD3+ (ul)      | 0.007564491 | 0.028044902 | 0.466336888  | NA             | DEPLETED-NS-NS             |
| m.i  | OTU_135                                                  | 8_TNFa+ IL-2- % IL-17a+ CD3+              | 0.015561719 | 0.023744748 | 0.444633889  | NA             | NA                         |
| m.i  | OTU_135                                                  | 7_Helios- IFNg- CD4+ CD3+ (ul)            | 0.007214349 | 0.021054106 | 0.460386679  | NA             | NS-ENRICHED-NS             |
| m.i  | OTU_135                                                  | 4_CD8+ CD4+ CD56+ CD3+ %                  | 0.012204827 | 0.021253984 | -0.464070117 | NA             | NA                         |
| m.i  | OTU_135                                                  | 8_TNFa+ IL-5- IL-17a- % CD3+              | 0.022253005 | 0.02355925  | 0.450651374  | NA             | DEPLETED-NS-DEPLETED       |
| m.i  | OTU_135                                                  | 8_TNFa+ IL-5- % IL-17a+ CD3+              | 0.026417918 | 0.021908043 | 0.446713146  | NA             | DEPLETED-NS-DEPLETED       |
| m.i  | OTU_135                                                  | 4_TCRgd+ % CD4- CD8- CD3+                 | 0.001957719 | 0.014305568 | 0.504373383  | NA             | ENRICHED-DEPLETED-NS       |
| m.i  | OTU_135                                                  | 8_TNFa+ IL-5+ IL-17a- CD4+ CD3+ (ul)      | 0.019696793 | 0.031041148 | 0.453423209  | NA             | DEPLETED-ENRICHED-NS       |
| m.i  | OTU_135                                                  | 7_FoxP3- Helios- CD4+ CD3+ (ul)           | 0.028363744 | 0.013425912 | 0.432381889  | NA             | DEPLETED-ENRICHED-NS       |
| m.i  | OTU_135                                                  | 8_TNFa+ IL-5- IL-17a- CD4+ CD3+ (ul)      | 0.006429954 | 0.022045103 | 0.470950457  | NA             | DEPLETED-NS-NS             |
| m.i  | OTU_135                                                  | 6_CD25- CD4+ (ul)                         | 0.013492294 | 0.041465118 | 0.446222593  | NA             | DEPLETED-ENRICHED-NS       |
| m.i  | Bacteria;Firmicutes;Erysipelotrichia;Erysipelotrichales; | 14_CD56dim CD16 high % CD56+ CD3-         | 0.000463595 | 0.01282841  | 0.51846385   | NA             | NA                         |
| m.i  | Bacteria;Firmicutes;Erysipelotrichia;Erysipelotrichales; | 10_IL-17a- IFNg- % TCRgd+ CD3+            | 0.010921336 | 0.015553959 | 0.443655766  | NA             | NA                         |



Table S7

| Test | Feature1                                                   | Feature2                                     | CORONA_Q    | CORONA_LRP  | CORONA_R     | Feature1CORONA | Feature2CORONA       |
|------|------------------------------------------------------------|----------------------------------------------|-------------|-------------|--------------|----------------|----------------------|
| m.i  | Bacteria;Firmicutes;Erysipelotrichia;Erysipelotrichales; 8 | IL-10- IL-2- % IL-17a+ CD3+                  | 0.002501998 | 0.010128425 | 0.462452787  | NA             | NA                   |
| m.i  | Bacteria;Firmicutes;Erysipelotrichia;Erysipelotrichales; 0 | IL-17a- IFNg+ % TCRgd+ CD3+                  | 0.030923113 | 0.033915745 | -0.418420857 | NA             | NA                   |
| m.i  | Bacteria;Firmicutes;Clostridia;Clostridiales;Christenser   | 6_CD161- CCR6- % CXCR3- CD25+ CD4+           | 0.007916542 | 0.047672093 | -0.435055575 | NA             | NA                   |
| m.i  | Bacteria;Firmicutes;Clostridia;Clostridiales;Christenser   | 6_CD161+ CCR6- CXCR3- CD25+ CD4+ (ul)        | 0.020415926 | 0.04952814  | 0.396928496  | NA             | DEPLETED-ENRICHED-NS |
| m.i  | OTU_10                                                     | 6_CD27- CXCR3+ CD25- % CD4+                  | 0.002247974 | 0.002501387 | -0.499094342 | NA             | NA                   |
| m.i  | OTU_10                                                     | 6_CD27- CXCR3+ % CD25- CD4+                  | 0.003207116 | 0.003294407 | -0.492050462 | NA             | NA                   |
| m.i  | OTU_10                                                     | 1_CD3+ %                                     | 0.001306062 | 0.000175832 | 0.50956476   | NA             | DEPLETED-ENRICHED-NS |
| m.i  | OTU_10                                                     | 6_CD27- CXCR3+ CD25- CD4+ (ul)               | 0.014178239 | 0.048920708 | -0.460774    | NA             | NA                   |
| m.i  | Bacteria;Firmicutes;Clostridia;Clostridiales;Ruminococ     | 5_CD62L- CD45RO- % CD8+ CD4-                 | 0.003533198 | 0.020959897 | -0.492780284 | NS-ENRICHED-NS | ENRICHED-NS-NS       |
| m.i  | Bacteria;Firmicutes;Negativicutes;Selenomonadales;V        | 5_CD62L- CD45RO- CD8+ CD4- CD3+ (ul)         | 0.038592873 | 0.023731066 | 0.412782418  | NA             | NA                   |
| m.i  | Bacteria;Proteobacteria                                    | 5_CD8_Tcm/Tn                                 | 0.016365176 | 0.026808038 | -0.418242838 | NA             | NA                   |
| m.i  | Bacteria;Proteobacteria                                    | 5_CD8_Tem/Tn                                 | 0.007616671 | 0.0192259   | -0.453078958 | NA             | NA                   |
| m.i  | Bacteria;Proteobacteria                                    | 10_CD69+ % Va7.2+ CD161+ CD4- CD8- CD3+      | 0.022033261 | 0.026298194 | 0.406638041  | NA             | NA                   |
| m.i  | Bacteria;Proteobacteria                                    | 6_CD27dim % CXCR3+ CD25- CD4+                | 0.007616671 | 0.019605802 | -0.453450966 | NA             | NA                   |
| m.i  | Bacteria;Proteobacteria;Deltaproteobacteria;Desulfovii     | 3_CD14- CD16- HLA-DR+ CD4dim/- %             | 0.044975738 | 0.012400356 | -0.420447358 | NA             | NA                   |
| m.i  | Bacteria;Proteobacteria;Deltaproteobacteria;Desulfovii     | 5_CD24- CD45RO- % CD8+ CD4-                  | 0.049908932 | 0.021713779 | 0.40595931   | NA             | NS-DEPLETED-NS       |
| m.i  | Bacteria;Proteobacteria;Deltaproteobacteria;Desulfovii     | 3_CD14- CD16- HLA-DR+ % CD4dim/-             | 0.044975738 | 0.037333268 | -0.429427397 | NA             | DEPLETED-ENRICHED-NS |
| m.i  | Bacteria;Proteobacteria;Deltaproteobacteria;Desulfovii     | 3_CD14- CD16- HLA-DR+ CD4dim/- (ul)          | 0.049908932 | 0.023901854 | -0.399812383 | NA             | NS-ENRICHED-NS       |
| m.i  | Bacteria;Firmicutes;Clostridia;Clostridiales;Lachnospir    | 8_TNFa+ IL-5+ IL-17a+ % CD3+                 | 0.005994284 | 0.002194645 | 0.467873306  | NA             | DEPLETED-ENRICHED-NS |
| m.i  | Bacteria;Firmicutes;Clostridia;Clostridiales;Lachnospir    | 8_TNFa+ IL-5+ IL-17a+ CD4+ CD3+ (ul)         | 0.007550872 | 0.003405697 | 0.452147738  | NA             | DEPLETED-ENRICHED-NS |
| m.i  | Bacteria;Firmicutes;Clostridia;Clostridiales;Lachnospir    | 8_TNFa+ IL-2- IL-17a+ CD4+ CD3+ (ul)         | 0.005994284 | 0.000869851 | 0.46581166   | NA             | DEPLETED-ENRICHED-NS |
| m.i  | Bacteria;Firmicutes;Clostridia;Clostridiales;Lachnospir    | 8_TNFa+ IL-2- IL-17a+ % CD3+                 | 0.007604533 | 0.001164784 | 0.45198689   | NA             | DEPLETED-NS-NS       |
| m.i  | Bacteria;Firmicutes;Clostridia;Clostridiales;Lachnospir    | 9_IL-17a- IFNg+ Va7.2+ CD161 % CD3+          | 0.036663609 | 0.03955182  | 0.39584745   | NA             | DEPLETED-NS-NS       |
| m.i  | Bacteria;Firmicutes                                        | 6_Th1/2_Treg                                 | 0.012514751 | 0.007667387 | -0.458088438 | NA             | NA                   |
| m.i  | Bacteria;Firmicutes                                        | 9_IFNg+ TNFa- % Va7.2+ CD161 CD3+            | 0.01723008  | 0.008632111 | 0.427054492  | NA             | NA                   |
| m.i  | Bacteria;Firmicutes                                        | 6_CXCR3- CD25- % CD4+                        | 0.026661938 | 0.00985638  | 0.410431026  | NA             | NA                   |
| m.i  | Bacteria;Firmicutes                                        | 6_Th17/Th1                                   | 0.012514751 | 0.016264264 | 0.4545032    | NA             | NA                   |
| m.i  | OTU_146                                                    | 5_CD24- CD45RO- % CD8+ CD4-                  | 0.014416593 | 9.42171E-05 | 0.46334148   | NA             | NS-DEPLETED-NS       |
| m.i  | OTU_103                                                    | 0_IL-17a- IFNg- % TCRgd+ CD3+                | 0.021779309 | 0.006483558 | 0.451141889  | NA             | NA                   |
| m.i  | OTU_103                                                    | 0_IL-17a- IFNg+ % TCRgd+ CD3+                | 0.024539237 | 0.008531604 | -0.448412418 | NA             | NA                   |
| m.i  | MF0017: alanine degradation (racemase pathway)             | 2_CD31- CD45RA+ CD25high CD127low CD4+ (ul)  | 0.044855306 | 0.005214374 | 0.438406731  | NA             | NA                   |
| m.i  | MF0017: alanine degradation (racemase pathway)             | 3_HLA-DR-CD4dim/- (ul)                       | 0.015616874 | 0.028077789 | 0.487796858  | NA             | NA                   |
| m.i  | MF0017: alanine degradation (racemase pathway)             | 2_FoxP3- CD45RA+ CD25high CD127low CD4+ (ul) | 0.043792696 | 0.008824115 | 0.431460144  | NA             | NA                   |
| m.i  | M00474: RcsC-RcsD-RcsB (capsule synthesis) two-cc          | 5_CD62L- CD45RO+ CD8+ CD4- CD3+ (ul)         | 0.001255633 | 0.007524461 | -0.535045813 | NA             | DEPLETED-ENRICHED-NS |
| m.i  | M00474: RcsC-RcsD-RcsB (capsule synthesis) two-cc          | 3_HLA-DR-CD4dim/- (ul)                       | 0.043879968 | 0.01046231  | -0.378639093 | NA             | NA                   |
| m.i  | M00474: RcsC-RcsD-RcsB (capsule synthesis) two-cc          | 5_CD8_Tem/Tcm                                | 0.034435165 | 0.007565269 | -0.400197314 | NA             | NA                   |
| m.i  | M00020: Serine biosynthesis, glycerate-3P => serine        | 3_CD14hi CD16- HLA-DR+ CD16+/HLA-DR- CD16-%  | 0.006298788 | 0.029108482 | -0.474194786 | NA             | ENRICHED-DEPLETED-NS |
| m.i  | M00020: Serine biosynthesis, glycerate-3P => serine        | 3_CD14hi CD16- % HLA-DR+ CD16+/HLA-DR- CD16- | 0.00554596  | 0.018500411 | -0.477150034 | NA             | ENRICHED-DEPLETED-NS |
| m.i  | M00439: Oligopeptide transport system                      | 5_CD24- CD45RO+ CD25- CD4+ % CD4high CD8-    | 0.009735421 | 0.009738667 | -0.483612847 | NA             | NS-DEPLETED-DEPLETED |
| m.i  | M00439: Oligopeptide transport system                      | 5_CD62L- CD45RO- % CD25+ CD4+ CD4high CD8-   | 0.019612956 | 0.008688113 | 0.431954564  | NA             | NA                   |
| m.i  | M00439: Oligopeptide transport system                      | 5_CD24- CD45RO+ % CD25- CD4+ CD4high CD8-    | 0.009735421 | 0.023689236 | -0.472764478 | NA             | NA                   |
| m.i  | M00439: Oligopeptide transport system                      | 5_CD62L- CD45RO- CD25+ CD4+ CD8- CD3+ (ul)   | 0.0223273   | 0.001371808 | 0.451828678  | NA             | DEPLETED-ENRICHED-NS |
| m.i  | M00439: Oligopeptide transport system                      | 5_CD4_Tcm/Tn                                 | 0.009735421 | 0.010209876 | -0.474176432 | NA             | NA                   |
| m.i  | M00439: Oligopeptide transport system                      | 5_CD62L- CD45RO- CD25+ CD4+ % CD4high CD8-   | 0.021330827 | 0.005683317 | 0.440627205  | NA             | NA                   |
| m.i  | M00395: Decapping complex                                  | 8_GM-CSF+ IL-2+ IL-17a- % CD3+               | 0.019113314 | 0.0025536   | -0.459906444 | NA             | NA                   |
| m.i  | M00395: Decapping complex                                  | 5_CD24- CD45RO+ CD25- CD4+ % CD4high CD8-    | 0.014209199 | 0.024025348 | -0.441224833 | NA             | NS-DEPLETED-DEPLETED |
| m.i  | M00395: Decapping complex                                  | 5_CD62L+ CD45RO- % CD25+ CD4+ CD4high CD8-   | 0.022188881 | 0.009971963 | 0.421699872  | NA             | NA                   |
| m.i  | M00395: Decapping complex                                  | 5_CD4_Tcm/Tn                                 | 0.008099179 | 0.019000253 | -0.466443979 | NA             | NA                   |
| m.i  | M00395: Decapping complex                                  | 8_GM-CSF+ IL-2+ % IL-17a- CD3+               | 0.017829874 | 0.002515117 | -0.461596806 | NA             | NA                   |
| m.i  | M00119: Pantothenate biosynthesis, valine/L-aspartate      | 5_CD62L- CD45RO- % CD25+ CD4+ CD4high CD8-   | 0.038243499 | 0.049076952 | 0.414576854  | NA             | NA                   |
| m.i  | M00289: RF-C complex                                       | 7_Helios+ IFNg+ CD4+ CD3+ (ul)               | 0.049809928 | 0.00241661  | -0.442239142 | NA             | NA                   |
| m.i  | M00289: RF-C complex                                       | 2_FoxP3+ CD39- CD25high CD127low % CD4+      | 0.032612944 | 0.014972829 | -0.446608197 | NA             | NA                   |
| m.i  | M00289: RF-C complex                                       | 2_FoxP3+ CD31- CD25high CD127low CD4+ (ul)   | 0.046320217 | 0.003728425 | -0.429962582 | NA             | DEPLETED-NS-NS       |
| m.i  | M00289: RF-C complex                                       | 2_FoxP3+ CD45RA- CD25high CD127low CD4+ (ul) | 0.036206567 | 0.002904793 | -0.413370439 | NA             | DEPLETED-NS-NS       |

Table S7

| Test | Feature1                                                 | Feature2                                     | CORONA_Q    | CORONA_LRP  | CORONA_R     | Feature1CORONA | Feature2CORONA             |
|------|----------------------------------------------------------|----------------------------------------------|-------------|-------------|--------------|----------------|----------------------------|
| m.i  | M00777: Avermectin biosynthesis, 2-methylbutanoyl-C 2    | FoxP3- CD45RA+ CD25high CD127low CD4+ (ul)   | 0.004518925 | 0.00089598  | 0.515120217  | NA             | NA                         |
| m.i  | M00777: Avermectin biosynthesis, 2-methylbutanoyl-C 3    | CD14- CD16- HLA-DR+ CD4dim/- %               | 0.039659778 | 0.04692782  | -0.366687355 | NA             | NA                         |
| m.i  | M00777: Avermectin biosynthesis, 2-methylbutanoyl-C 5    | CD4_Teff/2_Treg                              | 0.015318912 | 0.006248116 | 0.484490877  | NA             | NA                         |
| m.i  | M00777: Avermectin biosynthesis, 2-methylbutanoyl-C 2    | CD31- CD45RA+ CD25high CD127low % CD4+       | 0.021879656 | 0.026105002 | 0.482579948  | NA             | NA                         |
| m.i  | M00777: Avermectin biosynthesis, 2-methylbutanoyl-C 1    | CD4dim CD8bright CD4+ CD8+ CD3+ %            | 0.009462951 | 0.04759899  | -0.485858555 | NA             | NA                         |
| m.i  | M00777: Avermectin biosynthesis, 2-methylbutanoyl-C 5    | CD62L- CD45RO- CD25- CD4+ % CD4high CD8-     | 5.64263E-05 | 0.000189162 | 0.595178406  | NA             | ENRICHED-NS-NS             |
| m.i  | M00777: Avermectin biosynthesis, 2-methylbutanoyl-C 5    | CD4_Teff/Treg                                | 0.000129747 | 0.000764742 | 0.585286882  | NA             | ENRICHED-NS-NS             |
| m.i  | M00777: Avermectin biosynthesis, 2-methylbutanoyl-C 5    | CD62L- CD45RO- % CD25- CD4+ CD4high CD8-     | 5.77846E-05 | 0.000147361 | 0.594802444  | NA             | ENRICHED-NS-NS             |
| m.i  | M00777: Avermectin biosynthesis, 2-methylbutanoyl-C 2    | FoxP3- CD45RA+ CD25high CD127low % CD4+      | 0.001175199 | 0.000334472 | 0.542917242  | NA             | NA                         |
| m.i  | M00777: Avermectin biosynthesis, 2-methylbutanoyl-C 2    | FoxP3- CD45RA+ % CD25high CD127low CD4+      | 0.001063592 | 6.31212E-05 | 0.544785013  | NA             | NA                         |
| m.i  | M00777: Avermectin biosynthesis, 2-methylbutanoyl-C 5    | CD4_Tcm/Tn                                   | 0.015332951 | 0.034309488 | -0.43337136  | NA             | NA                         |
| m.i  | M00777: Avermectin biosynthesis, 2-methylbutanoyl-C 2    | CD31- CD45RA+ % -CD25high CD127low CD4+      | 0.003245631 | 0.004167247 | 0.506835048  | NA             | NA                         |
| m.i  | M00777: Avermectin biosynthesis, 2-methylbutanoyl-C 2    | CD39- CD45RA+ % CD25high CD127low CD4+       | 0.006190253 | 0.036519286 | 0.486284338  | NA             | NA                         |
| m.i  | M00024: Phenylalanine biosynthesis, chorismate => pl 4   | CD56high CD16- CD3- %                        | 0.047856654 | 0.000543945 | 0.438221646  | NA             | NA                         |
| m.i  | M00024: Phenylalanine biosynthesis, chorismate => pl 4   | CD56high CD16- % CD3-                        | 0.047856654 | 0.000543945 | 0.438221646  | NA             | NA                         |
| m.i  | M00715: Lincosamide resistance, efflux pump LmrB         | 2_FoxP3+ CD45RA+ % CD25high CD127low CD4+    | 0.006755493 | 0.024429153 | -0.500849548 | NA             | NA                         |
| m.i  | M00715: Lincosamide resistance, efflux pump LmrB         | 3_CD14hi CD16- % HLA-DR+ CD16+/HLA-DR- CD16- | 0.021150004 | 0.006342223 | -0.429247394 | NA             | ENRICHED-DEPLETED-NS       |
| m.i  | M00715: Lincosamide resistance, efflux pump LmrB         | 2_FoxP3+ CD31- % CD25high CD127low CD4+      | 0.049762349 | 0.016208089 | -0.380061026 | NA             | NA                         |
| m.i  | M00715: Lincosamide resistance, efflux pump LmrB         | 3_CD14hi CD16- HLA-DR+ CD16+/HLA-DR- CD16-%  | 0.021150004 | 0.009546008 | -0.42271083  | NA             | ENRICHED-DEPLETED-NS       |
| m.i  | M00715: Lincosamide resistance, efflux pump LmrB         | 6_CD161+ CCR6- CXCR3- CD25- % CD4+           | 0.041187398 | 0.034250387 | 0.389878968  | NA             | NA                         |
| m.i  | M00667: Tetracycline resistance, efflux pump             | 5_CD24- CD45RO+ CD25- CD4+ % CD4high CD8-    | 0.032568143 | 0.008953175 | -0.426064636 | NA             | NS-DEPLETED-DEPLETED       |
| m.i  | M00667: Tetracycline resistance, efflux pump             | 5_CD62L- CD45RO- % CD25+ CD4+ CD4high CD8-   | 0.032568143 | 0.004791122 | 0.412172372  | NA             | NA                         |
| m.i  | M00667: Tetracycline resistance, efflux pump             | 5_CD24- CD45RO+ % CD25- CD4+ CD4high CD8-    | 0.045428487 | 0.029274381 | -0.397948278 | NA             | NA                         |
| m.i  | M00667: Tetracycline resistance, efflux pump             | 5_CD4_Tcm/Tn                                 | 0.032568143 | 0.03161858  | -0.413833909 | NA             | NA                         |
| m.i  | M00667: Tetracycline resistance, efflux pump             | 5_CD62L- CD45RO- CD25+ CD4+ CD8- CD3+ (ul)   | 0.032568143 | 0.000321873 | 0.414923772  | NA             | DEPLETED-ENRICHED-NS       |
| m.i  | M00667: Tetracycline resistance, efflux pump             | 4_CD8+ CD4- CD56+ CD3+ %                     | 0.040202297 | 0.038526773 | 0.422827129  | NA             | NA                         |
| m.i  | M00667: Tetracycline resistance, efflux pump             | 5_CD62L- CD45RO- CD25+ CD4+ % CD4high CD8-   | 0.032568143 | 0.002609568 | 0.423221676  | NA             | NA                         |
| m.i  | M00319: Manganese/zinc/iron transport system             | 5_CD62L- CD45RO- % CD8+ CD4-                 | 0.012772167 | 0.023320368 | -0.494583737 | NA             | ENRICHED-NS-NS             |
| m.i  | M00403: HRD1/SEL1 ERAD complex                           | 9_IL2- TNFa- Va7.2+ CD161+ CD4- CD3+ (ul)    | 0.047857617 | 0.040492275 | -0.416558578 | NA             | DEPLETED-ENRICHED-NS       |
| m.i  | M00403: HRD1/SEL1 ERAD complex                           | 9_IL-17a- TNFa- Va7.2+ CD161+ CD4- CD3+ (ul) | 0.047857617 | 0.026938899 | -0.425071704 | NA             | DEPLETED-ENRICHED-NS       |
| m.i  | M00189: Molybdate transport system                       | 5_CD62L+ CD45RO+ CD8+ CD4- CD3+ (ul)         | 0.047810341 | 0.001830677 | -0.399912312 | NA             | NA                         |
| m.i  | M00189: Molybdate transport system                       | 0_TCRgd+ % CD3+                              | 0.047810341 | 0.047148792 | 0.403441945  | NA             | NA                         |
| m.i  | M00189: Molybdate transport system                       | 0_IL-17a- IL-22- TCRgd+ % CD3+               | 0.049425079 | 0.04679404  | 0.395447404  | NA             | NA                         |
| m.i  | M00288: RPA complex                                      | 3_HLA-DR+ CD16+/HLA-DR- CD16- %              | 0.021480301 | 0.021780053 | -0.451660541 | NA             | NA                         |
| m.i  | M00288: RPA complex                                      | 2_FoxP3+ CD31- % CD25high CD127low CD4+      | 0.007851957 | 0.004940742 | -0.488183687 | NA             | NA                         |
| m.i  | M00672: Penicillin biosynthesis, aminoacidate + cyctei 1 | CD4dim CD8bright CD4+ CD8+ CD3+ (ul)         | 0.005075797 | 0.009535382 | 0.499570547  | NA             | NA                         |
| m.i  | M00672: Penicillin biosynthesis, aminoacidate + cyctei 6 | CXCR3- CD25+ CD4+ (ul)                       | 0.001773881 | 0.012480555 | 0.528320573  | NA             | DEPLETED-ENRICHED-DEPLETED |
| m.i  | M00797: dTDP-D-desosamine biosynthesis                   | 4_CD56high CD16- CD3- %                      | 0.04156126  | 0.037491351 | -0.410600223 | NA             | NA                         |
| m.i  | M00797: dTDP-D-desosamine biosynthesis                   | 4_CD56high CD16- % CD3-                      | 0.04156126  | 0.037491351 | -0.410600223 | NA             | NA                         |
| m.i  | M00104: Bile acid biosynthesis, cholesterol => cholate 2 | FoxP3+ % CD25high CD127low CD4+              | 0.048091689 | 0.007915719 | -0.42895703  | NA             | NA                         |
| m.i  | M00104: Bile acid biosynthesis, cholesterol => cholate 5 | CD24- CD4high CD8dim % CD4+ CD8              | 0.028272427 | 0.028868671 | 0.460246719  | NA             | NA                         |
| m.i  | M00096: C5 isoprenoid biosynthesis, non-mevalonate 3     | HLA-DR- % CD4dim/-                           | 0.006684298 | 0.018773732 | 0.467686687  | NA             | NA                         |
| m.i  | M00096: C5 isoprenoid biosynthesis, non-mevalonate 4     | CD56high CD16+ CD3- %                        | 0.044476368 | 0.001299644 | 0.372560846  | NA             | NA                         |
| m.i  | M00096: C5 isoprenoid biosynthesis, non-mevalonate 3     | HLA-DR-CD4dim/- (ul)                         | 0.018072869 | 0.010310644 | 0.421958349  | NA             | NA                         |
| m.i  | M00096: C5 isoprenoid biosynthesis, non-mevalonate 4     | CD56high CD16+ % CD3-                        | 0.044476368 | 0.001299644 | 0.372560846  | NA             | NA                         |
| m.i  | M00096: C5 isoprenoid biosynthesis, non-mevalonate 3     | HLA-DR+ % CD4dim/-                           | 0.006684298 | 0.018773732 | -0.467686687 | NA             | NA                         |
| m.i  | M00521: CiaH-CiaR two-component regulatory system 2      | FoxP3+ CD45RA+ % CD25high CD127low CD4+      | 0.010321916 | 0.024132736 | -0.481656198 | NA             | NA                         |
| m.i  | M00521: CiaH-CiaR two-component regulatory system 2      | FoxP3- CD45RA+ % CD25high CD127low CD4+      | 0.032096926 | 0.002616342 | -0.417108625 | NA             | NA                         |
| m.i  | M00521: CiaH-CiaR two-component regulatory system 2      | FoxP3+ CD45RA- % CD25high CD127low CD4+      | 0.020786275 | 0.013697762 | 0.427111026  | NA             | NA                         |
| m.i  | M00521: CiaH-CiaR two-component regulatory system 2      | CD31- CD45RA+ % -CD25high CD127low CD4+      | 0.00496456  | 0.000865418 | -0.500338075 | NA             | NA                         |
| m.i  | M00521: CiaH-CiaR two-component regulatory system 4      | CD8+ CD4+ CD56+ CD3+ %                       | 0.028138629 | 0.023855371 | 0.433771934  | NA             | NA                         |
| m.i  | M00521: CiaH-CiaR two-component regulatory system 8      | TNFA- IL-2- % IL-17a+ CD3+                   | 0.043007169 | 0.038966688 | 0.431941744  | NA             | ENRICHED-DEPLETED-NS       |
| m.i  | M00521: CiaH-CiaR two-component regulatory system 2      | CD39- CD45RO+ % CD25high CD127low CD4+       | 0.006190253 | 0.003477721 | -0.492475675 | NA             | NA                         |
| m.i  | M00408: ESCRT-0 complex                                  | 3_CD14low CD16+ HLA-DR+ CD16+/HLA-DR- CD16-% | 0.035593542 | 0.012761466 | 0.454588651  | NA             | ENRICHED-DEPLETED-NS       |

Table S7

| Test | Feature1                                               | Feature2                                         | CORONA_Q    | CORONA_LRP  | CORONA_R     | Feature1CORONA | Feature2CORONA       |
|------|--------------------------------------------------------|--------------------------------------------------|-------------|-------------|--------------|----------------|----------------------|
| m.i  | M00408: ESCRT-0 complex                                | 2_FoxP3+ CD31+ CD25high CD127low CD4+ (ul)       | 0.021036115 | 0.01336796  | -0.483472096 | NA             | NA                   |
| m.i  | M00408: ESCRT-0 complex                                | 2_CD25high CD127low CD4+ (ul)                    | 0.000265968 | 0.005719806 | -0.569619569 | NA             | DEPLETED-NS-NS       |
| m.i  | M00408: ESCRT-0 complex                                | 2_FoxP3+ CD31- CD25high CD127low CD4+ (ul)       | 0.000866435 | 0.013229902 | -0.548587518 | NA             | DEPLETED-NS-NS       |
| m.i  | M00408: ESCRT-0 complex                                | 2_FoxP3+ CD45RA- CD25high CD127low CD4+ (ul)     | 0.01290238  | 0.028030141 | -0.484522904 | NA             | DEPLETED-NS-NS       |
| m.i  | M00408: ESCRT-0 complex                                | 7_IFNg- IL-17a- IL-22+ CD4+ CD3+ (ul)            | 0.013968502 | 0.002144393 | -0.49261805  | NA             | NA                   |
| m.i  | M00408: ESCRT-0 complex                                | 2_CD39- CD45RA+ CD25high CD127low CD4+ (ul)      | 0.002469233 | 0.019808046 | -0.528656018 | NA             | NA                   |
| m.i  | M00408: ESCRT-0 complex                                | 3_CD14low CD16++ % HLA-DR+ CD16+/HLA-DR- CD16-   | 0.043791057 | 0.013682193 | 0.44940977   | NA             | ENRICHED-DEPLETED-NS |
| m.i  | M00408: ESCRT-0 complex                                | 7_IL-17a- IL-22+ CD4+ CD3+ (ul)                  | 0.020925454 | 0.002656517 | -0.483591592 | NA             | NA                   |
| m.i  | M00408: ESCRT-0 complex                                | 1_CD4+ CD8- CD3+ (ul)                            | 0.016681306 | 0.013390105 | -0.472847548 | NA             | DEPLETED-ENRICHED-NS |
| m.i  | M00408: ESCRT-0 complex                                | 2_FoxP3+ CD45RA+ CD25high CD127low CD4+ (ul)     | 0.004572507 | 0.026144932 | -0.516307152 | NA             | NA                   |
| m.i  | M00408: ESCRT-0 complex                                | 2_CD31- CD45RA+ CD25high CD127low CD4+ (ul)      | 0.003922288 | 0.020201342 | -0.51942688  | NA             | NA                   |
| m.i  | M00032: Lysine degradation, lysine => saccharopine = 2 | CD31+ CD45RA+ % -CD25high CD127low CD4+          | 0.03808436  | 0.001863073 | 0.469732187  | NA             | NA                   |
| m.i  | M00728: Cationic antimicrobial peptide (CAMP) resista  | 3_CD11c+ CD14- CD16- % HLA-DR+ CD4dim/-          | 0.000212705 | 0.001719526 | 0.573440754  | NA             | NA                   |
| m.i  | M00486: CitA-CitB (citrate fermentation) two-compone   | 5_CD25+ CD4+% CD4high                            | 0.019695562 | 0.010216659 | 0.46119127   | NA             | DEPLETED-NS-NS       |
| m.i  | M00486: CitA-CitB (citrate fermentation) two-compone   | 5_CD25- CD4+% CD4high cells                      | 0.035670001 | 0.012676235 | -0.444323596 | NA             | ENRICHED-NS-NS       |
| m.i  | M00496: ComD-ComE (competence) two-component r         | 0_IL-17a- IFNg- % TCRgd+ CD3+                    | 0.008628295 | 0.004649046 | 0.487928688  | NA             | NA                   |
| m.i  | M00496: ComD-ComE (competence) two-component r         | 8_TNFa+ IL-5- % IL-17a+ CD3+                     | 0.000398289 | 0.001972659 | -0.562590214 | NA             | DEPLETED-NS-DEPLETED |
| m.i  | M00496: ComD-ComE (competence) two-component r         | 8_TNFa+ IL-5- IL-17a+ % CD3+                     | 0.002285914 | 2.11212E-05 | -0.530168437 | NA             | NA                   |
| m.i  | M00496: ComD-ComE (competence) two-component r         | 0_IL-17a- IFNg+ % TCRgd+ CD3+                    | 0.00509059  | 0.006791637 | -0.499507835 | NA             | NA                   |
| m.i  | M00496: ComD-ComE (competence) two-component r         | 8_TNFa+ IL-5- IL-17a+ CD4+ CD3+ (ul)             | 0.00331133  | 0.000168226 | -0.522835305 | NA             | DEPLETED-ENRICHED-NS |
| m.i  | M00001: Glycolysis (Embden-Meyerhof pathway), gluc     | 3_HLA-DR+ CD4dim/- %                             | 0.002102807 | 0.023876068 | -0.502315597 | NA             | ENRICHED-NS-NS       |
| m.i  | M00001: Glycolysis (Embden-Meyerhof pathway), gluc     | 3_CD123+ CD14- CD16- % HLA-DR+ CD4dim/-          | 0.013509073 | 0.026511113 | 0.493353683  | NA             | NA                   |
| m.i  | M00001: Glycolysis (Embden-Meyerhof pathway), gluc     | 3_CD11c+ CD14- CD16- % HLA-DR+ CD4dim/-          | 0.006974232 | 0.01367307  | 0.483594578  | NA             | NA                   |
| m.i  | M00001: Glycolysis (Embden-Meyerhof pathway), gluc     | 3_CD14hi CD16- % HLA-DR+ CD16+/HLA-DR- CD16-     | 0.006391495 | 0.00909597  | -0.469568395 | NA             | ENRICHED-DEPLETED-NS |
| m.i  | M00001: Glycolysis (Embden-Meyerhof pathway), gluc     | 3_CD14hi CD16- HLA-DR+ CD16+/HLA-DR- CD16-%      | 0.007349161 | 0.018229074 | -0.466247694 | NA             | ENRICHED-DEPLETED-NS |
| m.i  | M00159: V/A-type ATPase, prokaryotes                   | 8_GM-CSF- IL-2- IL-17a+ CD4+ CD3+ (ul)           | 0.049972098 | 0.005335105 | 0.439459262  | NA             | DEPLETED-ENRICHED-NS |
| m.i  | M00615: Nitrate assimilation                           | 3_CD11c+ CD14- CD16- % HLA-DR+ CD4dim/-          | 0.047546348 | 0.020035877 | -0.406755819 | NA             | NA                   |
| m.i  | M00615: Nitrate assimilation                           | 6_CD27bright CD161+ CCR6+ CXCR3- % CD25- CD4+    | 0.004525708 | 0.019860817 | 0.503069506  | NA             | NA                   |
| m.i  | M00615: Nitrate assimilation                           | 6_CD27bright CD161+ CCR6+ CXCR3- CD25- CD4+ (ul) | 0.001389315 | 0.033499249 | 0.535384449  | NA             | DEPLETED-NS-NS       |
| m.i  | M00615: Nitrate assimilation                           | 6_CD27bright CD161+ CCR6+ % CXCR3- CD25- CD4+    | 0.005834151 | 0.017011433 | 0.496556011  | NA             | NA                   |
| m.i  | M00615: Nitrate assimilation                           | 6_CD27bright CD161+ CCR6+ CXCR3- CD25- % CD4+    | 0.003517374 | 0.024576252 | 0.507376791  | NA             | NA                   |
| m.i  | M00429: Competence-related DNA transformation tran     | 3_CD14hi CD16- HLA-DR+ CD16+/HLA-DR- CD16-%      | 0.030501789 | 0.043458799 | -0.412846886 | NA             | ENRICHED-DEPLETED-NS |
| m.i  | M00429: Competence-related DNA transformation tran     | 3_CD14hi CD16- % HLA-DR+ CD16+/HLA-DR- CD16-     | 0.030501789 | 0.022749561 | -0.413975794 | NA             | ENRICHED-DEPLETED-NS |
| m.i  | MF0101: Sulfate reduction (assimilatory)               | 4_CD56high CD16+ % CD3-                          | 0.001753175 | 0.001744262 | -0.521687501 | NA             | NA                   |
| m.i  | MF0101: Sulfate reduction (assimilatory)               | 2_FoxP3+ CD45RA- % CD25high CD127low CD4+        | 0.01002772  | 0.029561533 | 0.428324793  | NA             | NA                   |
| m.i  | MF0101: Sulfate reduction (assimilatory)               | 3_HLA-DR- CD4dim/- (ul)                          | 0.00618892  | 0.043691864 | -0.45370844  | NA             | NA                   |
| m.i  | MF0101: Sulfate reduction (assimilatory)               | 4_CD56high CD16- CD3- (ul)                       | 9.76047E-05 | 0.001415596 | -0.584947022 | NA             | NA                   |
| m.i  | MF0101: Sulfate reduction (assimilatory)               | 4_CD56high CD16- CD3- %                          | 0.034584036 | 0.026045444 | -0.42807556  | NA             | NA                   |
| m.i  | MF0101: Sulfate reduction (assimilatory)               | 4_CD56dim CD16+ % CD3-                           | 0.035118916 | 0.002309472 | -0.359768351 | NA             | NA                   |
| m.i  | MF0101: Sulfate reduction (assimilatory)               | 5_CD62L+ CD45RO- CD8+ CD4- CD3+ (ul)             | 0.006907789 | 0.011807602 | -0.453891122 | NA             | DEPLETED-NS-NS       |
| m.i  | MF0101: Sulfate reduction (assimilatory)               | 3_CD11c+ CD14- CD16- HLA-DR+ CD4dim/- %          | 0.011309243 | 0.001751992 | 0.472453893  | NA             | ENRICHED-NS-NS       |
| m.i  | MF0101: Sulfate reduction (assimilatory)               | 4_CD56high CD16+ CD3- %                          | 0.001753175 | 0.001744262 | -0.521687501 | NA             | NA                   |
| m.i  | MF0101: Sulfate reduction (assimilatory)               | 3_CD11c+ CD14- CD16- HLA-DR+ % CD4dim/-          | 0.004446143 | 0.000319237 | 0.502411667  | NA             | NA                   |
| m.i  | MF0101: Sulfate reduction (assimilatory)               | 2_FoxP3+ CD31- % CD25high CD127low CD4+          | 0.049762349 | 0.01477726  | 0.381192508  | NA             | NA                   |
| m.i  | MF0101: Sulfate reduction (assimilatory)               | 4_CD56dim CD16+ CD3- (ul)                        | 0.012860876 | 0.00641344  | -0.421812203 | NA             | NA                   |
| m.i  | MF0101: Sulfate reduction (assimilatory)               | 4_CD56high CD16- % CD3-                          | 0.034584036 | 0.026045444 | -0.42807556  | NA             | NA                   |
| m.i  | MF0101: Sulfate reduction (assimilatory)               | 4_CD56high CD16+ CD3- (ul)                       | 9.03473E-05 | 0.000175676 | -0.57619935  | NA             | NA                   |
| m.i  | MF0101: Sulfate reduction (assimilatory)               | 4_CD56dim CD16+ CD3- %                           | 0.035118916 | 0.002309472 | -0.359768351 | NA             | NA                   |
| m.i  | M00485: KinABCDE-Spo0FA (sporulation control) two-     | 4_CD56high CD16+ % CD3-                          | 0.021535123 | 0.030990508 | 0.448311779  | NA             | NA                   |
| m.i  | M00485: KinABCDE-Spo0FA (sporulation control) two-     | 4_CD56high CD16+ CD3- %                          | 0.021535123 | 0.030990508 | 0.448311779  | NA             | NA                   |
| m.i  | M00525: Lysine biosynthesis, acetyl-DAP pathway, asj   | 3_CD14hi CD16- % HLA-DR+ CD16+/HLA-DR- CD16-     | 0.046763547 | 0.014655762 | -0.388453985 | NA             | ENRICHED-DEPLETED-NS |
| m.i  | M00525: Lysine biosynthesis, acetyl-DAP pathway, asj   | 3_CD14hi CD16- HLA-DR+ CD16+/HLA-DR- CD16-%      | 0.047253972 | 0.040191399 | -0.372234503 | NA             | ENRICHED-DEPLETED-NS |
| m.i  | M00737: Bacitracin resistance, vRadE transporter       | 5_CD4_Tcm/Treg                                   | 0.036906614 | 0.009171632 | -0.371076565 | NA             | ENRICHED-NS-ENRICHED |
| m.i  | MF0036: arginine degradation (ornithine decarboxylas   | 6_CD161+ CCR6+ CXCR3- % CD25+ CD4+               | 0.01696605  | 0.000789661 | -0.455771385 | NA             | NA                   |

Table S7

| Test | Feature1                                               | Feature2                                   | CORONA_Q    | CORONA_LRP  | CORONA_R     | Feature1CORONA | Feature2CORONA             |
|------|--------------------------------------------------------|--------------------------------------------|-------------|-------------|--------------|----------------|----------------------------|
| m.i  | MF0036: arginine degradation (ornithine decarboxylase) | 6_CD161+ CCR6+ CXCR3- CD25+ % CD4+         | 0.001143486 | 0.001007499 | -0.536842138 | NA             | NA                         |
| m.i  | MF0036: arginine degradation (ornithine decarboxylase) | 2_CD31+ CD45RA+ % -CD25high CD127low CD4+  | 0.044042727 | 0.006437741 | 0.438882816  | NA             | NA                         |
| m.i  | M00633: Semi-phosphorylative Entner-Doudoroff path     | 4_CD8+ CD4- CD56+ CD3+ %                   | 0.043796582 | 0.040884105 | -0.429853097 | NA             | NA                         |
| m.i  | MF0027: cysteine degradation                           | 4_CD56high CD16+ % CD3-                    | 0.016426215 | 0.003160628 | 0.433402767  | NA             | NA                         |
| m.i  | MF0027: cysteine degradation                           | 4_CD56high CD16+ CD3- %                    | 0.016426215 | 0.003160628 | 0.433402767  | NA             | NA                         |
| m.i  | MF0111: triacylglycerol degradation                    | 4_CD56high CD16+ % CD3-                    | 0.003018985 | 0.003104646 | 0.490905607  | NA             | NA                         |
| m.i  | MF0111: triacylglycerol degradation                    | 4_CD56high CD16+ CD3- %                    | 0.003018985 | 0.003104646 | 0.490905607  | NA             | NA                         |
| m.i  | MF0111: triacylglycerol degradation                    | 4_CD56high CD16+ CD3- (ul)                 | 0.004587896 | 0.011493159 | 0.46781457   | NA             | NA                         |
| m.i  | M00352: Spliceosome, U2-snRNP                          | 5_CD24+ CD45RO- CD25- CD4+ % CD4high CD8-  | 0.026731931 | 0.010015455 | 0.4779959    | NA             | NA                         |
| m.i  | M00352: Spliceosome, U2-snRNP                          | 2_FoxP3+ CD39+ CD25high CD127low % CD4+    | 0.001060738 | 0.028607429 | -0.506763627 | NA             | NA                         |
| m.i  | M00352: Spliceosome, U2-snRNP                          | 5_CD24+ CD45RO- % CD25- CD4+ CD4high CD8-  | 0.023280823 | 0.011633358 | 0.473206353  | NA             | NA                         |
| m.i  | M00352: Spliceosome, U2-snRNP                          | 5_CD24+ CD45RO- CD25- CD4+ CD8- CD3+ (ul)  | 0.048586805 | 0.010865503 | 0.446928048  | NA             | NA                         |
| m.i  | M00352: Spliceosome, U2-snRNP                          | 2_CD39+ CD31- CD25high CD127low % CD4+     | 0.001833613 | 0.022013342 | -0.517437773 | NA             | NA                         |
| m.i  | M00044: Tyrosine degradation, tyrosine => homogenti    | 5_CD62L+ CD45RO- CD8+ CD4- CD3+ (ul)       | 0.016155372 | 0.023627777 | -0.448305474 | NA             | DEPLETED-NS-NS             |
| m.i  | M00044: Tyrosine degradation, tyrosine => homogenti    | 5_CD8_Teff/Tn                              | 0.026894636 | 0.020376894 | 0.429231755  | NA             | NA                         |
| m.i  | M00298: Multidrug/hemolysin transport system           | 5_CD62+- CD45RO+ % CD25- CD4+ CD4high CD8- | 0.044694717 | 0.010927017 | -0.405758709 | NA             | NA                         |
| m.i  | M00298: Multidrug/hemolysin transport system           | 5_CD62L+ CD45RO+ CD25- CD4+ % CD4high CD8- | 0.043746825 | 0.00708646  | -0.410782469 | NA             | NA                         |
| m.i  | M00627: beta-Lactam resistance, Bla system             | 3_CD11c+ CD14- CD16- HLA-DR+ % CD4dim/-    | 0.035149876 | 0.006517737 | 0.438210256  | NA             | NA                         |
| m.i  | M00616: Sulfate-sulfur assimilation                    | 3_CD11c+ CD14- CD16- HLA-DR+ % CD4dim/-    | 0.010808049 | 0.000382371 | 0.474860236  | NA             | NA                         |
| m.i  | M00616: Sulfate-sulfur assimilation                    | 5_CD62L+ CD45RO+ CD8+ CD4- CD3+ (ul)       | 0.004227533 | 0.025670414 | -0.517354768 | NA             | NA                         |
| m.i  | M00176: Assimilatory sulfate reduction, sulfate => H2S | 5_CD62L+ CD45RO- CD8+ CD4- CD3+ (ul)       | 0.006907789 | 0.011807602 | -0.453891122 | NA             | DEPLETED-NS-NS             |
| m.i  | M00176: Assimilatory sulfate reduction, sulfate => H2S | 3_CD11c+ CD14- CD16- HLA-DR+ CD4dim/- %    | 0.011309243 | 0.001751992 | 0.472453893  | NA             | ENRICHED-NS-NS             |
| m.i  | M00176: Assimilatory sulfate reduction, sulfate => H2S | 4_CD56dim CD16+ CD3- (ul)                  | 0.012860876 | 0.00641344  | -0.421812203 | NA             | NA                         |
| m.i  | M00176: Assimilatory sulfate reduction, sulfate => H2S | 4_CD56high CD16+ CD3- (ul)                 | 9.03473E-05 | 0.000175676 | -0.57619935  | NA             | NA                         |
| m.i  | M00176: Assimilatory sulfate reduction, sulfate => H2S | 4_CD56high CD16- % CD3-                    | 0.034584036 | 0.026045444 | -0.42807556  | NA             | NA                         |
| m.i  | M00176: Assimilatory sulfate reduction, sulfate => H2S | 4_CD56dim CD16+ CD3- %                     | 0.035118916 | 0.002309472 | -0.359768351 | NA             | NA                         |
| m.i  | M00176: Assimilatory sulfate reduction, sulfate => H2S | 4_CD56high CD16+ CD3- %                    | 0.001753175 | 0.001744262 | -0.521687501 | NA             | NA                         |
| m.i  | M00176: Assimilatory sulfate reduction, sulfate => H2S | 3_CD11c+ CD14- CD16- HLA-DR+ % CD4dim/-    | 0.004446143 | 0.000319237 | 0.502411667  | NA             | NA                         |
| m.i  | M00176: Assimilatory sulfate reduction, sulfate => H2S | 2_FoxP3+ CD31- % CD25high CD127low CD4+    | 0.049762349 | 0.01477726  | 0.381192508  | NA             | NA                         |
| m.i  | M00176: Assimilatory sulfate reduction, sulfate => H2S | 3_HLA-DR-CD4dim/- (ul)                     | 0.00618892  | 0.043691864 | -0.45370844  | NA             | NA                         |
| m.i  | M00176: Assimilatory sulfate reduction, sulfate => H2S | 4_CD56high CD16+ % CD3-                    | 0.001753175 | 0.001744262 | -0.521687501 | NA             | NA                         |
| m.i  | M00176: Assimilatory sulfate reduction, sulfate => H2S | 2_FoxP3+ CD45RA- % CD25high CD127low CD4+  | 0.01002772  | 0.029561533 | 0.428324793  | NA             | NA                         |
| m.i  | M00176: Assimilatory sulfate reduction, sulfate => H2S | 4_CD56high CD16- CD3- (ul)                 | 9.76047E-05 | 0.001415596 | -0.584947022 | NA             | NA                         |
| m.i  | M00176: Assimilatory sulfate reduction, sulfate => H2S | 4_CD56high CD16- CD3- %                    | 0.034584036 | 0.026045444 | -0.42807556  | NA             | NA                         |
| m.i  | M00176: Assimilatory sulfate reduction, sulfate => H2S | 4_CD56dim CD16+ % CD3-                     | 0.035118916 | 0.002309472 | -0.359768351 | NA             | NA                         |
| m.i  | M00183: RNA polymerase, bacteria                       | 2_FoxP3+ CD39+ % CD25high CD127low CD4+    | 0.028433894 | 0.043089539 | -0.412215556 | NA             | NA                         |
| m.i  | M00183: RNA polymerase, bacteria                       | 2_FoxP3+ CD39+ CD25high CD127low % CD4+    | 0.023891908 | 0.027238745 | -0.427513002 | NA             | NA                         |
| m.i  | M00497: GlnL-GlnG (nitrogen regulation) two-component  | 3_HLA-DR-CD4dim/- (ul)                     | 0.042990258 | 0.014234944 | -0.397665306 | NA             | NA                         |
| m.i  | M00497: GlnL-GlnG (nitrogen regulation) two-component  | 2_FoxP3+ CD39+ CD25high CD127low % CD4+    | 0.024536085 | 0.027541255 | 0.462552537  | NA             | NA                         |
| m.i  | M00212: Ribose transport system                        | 5_CD62L- CD45RO- % CD8+ CD4-               | 0.043332088 | 0.002580294 | 0.432295663  | NA             | ENRICHED-NS-NS             |
| m.i  | M00673: Cephamycin C biosynthesis, aminoacidate +      | 6_CXCR3- CD25+ CD4+ (ul)                   | 0.001773881 | 0.012480555 | 0.528320573  | NA             | DEPLETED-ENRICHED-DEPLETED |
| m.i  | M00673: Cephamycin C biosynthesis, aminoacidate +      | 1_CD4dim CD8bright CD4+ CD8+ CD3+ (ul)     | 0.005075797 | 0.009535382 | 0.499570547  | NA             | NA                         |
| m.i  | M00252: Lipooligosaccharide transport system           | 0_IL-17a- IL-22- % TCRgd+ CD3+             | 0.000289553 | 0.001725309 | 0.568154008  | NA             | NA                         |
| m.i  | M00252: Lipooligosaccharide transport system           | 0_IL-17a- IL-22+ % TCRgd+ CD3+             | 0.001311012 | 0.005009072 | -0.540857221 | NA             | NA                         |
| m.i  | M00630: D-Galacturonate degradation (fungi), D-galac   | 4_CD56high CD16+ CD3- %                    | 0.01630166  | 0.007781374 | -0.419008725 | NA             | NA                         |
| m.i  | M00630: D-Galacturonate degradation (fungi), D-galac   | 5_CD24+ CD45RO- CD25+ CD4+ CD8- CD3+ (ul)  | 0.0226264   | 0.016993148 | -0.481816451 | NA             | NA                         |
| m.i  | M00630: D-Galacturonate degradation (fungi), D-galac   | 6_CD161- CCR6- % CXCR3- CD25+ CD4+         | 0.03825953  | 0.01511998  | 0.46962364   | NA             | NA                         |
| m.i  | M00630: D-Galacturonate degradation (fungi), D-galac   | 4_CD56high CD16+ CD3- (ul)                 | 0.011067075 | 0.010035333 | -0.429552631 | NA             | NA                         |
| m.i  | M00630: D-Galacturonate degradation (fungi), D-galac   | 8_TNFA+ IL-2- % IL-17a+ CD3+               | 0.035108769 | 0.0084598   | -0.440084417 | NA             | NA                         |
| m.i  | M00630: D-Galacturonate degradation (fungi), D-galac   | 8_GM-CSF- IL-2- % IL-17a+ CD3+             | 0.001355188 | 0.026705687 | 0.540230245  | NA             | NA                         |
| m.i  | M00630: D-Galacturonate degradation (fungi), D-galac   | 5_CD62L- CD45RO- % CD25+ CD4+ CD4high CD8- | 0.019612956 | 0.03571792  | -0.42125557  | NA             | NA                         |
| m.i  | M00630: D-Galacturonate degradation (fungi), D-galac   | 3_CD11c+ CD14- CD16- HLA-DR+ CD4dim/- %    | 0.042968349 | 0.013051349 | 0.421002208  | NA             | ENRICHED-NS-NS             |
| m.i  | M00630: D-Galacturonate degradation (fungi), D-galac   | 5_CD62L+ CD45RO- CD8+ CD4- CD3+ (ul)       | 0.001552362 | 0.012771121 | -0.524122508 | NA             | DEPLETED-NS-NS             |
| m.i  | M00630: D-Galacturonate degradation (fungi), D-galac   | 5_CD24- CD45RO- CD8+ CD4- CD3+ (ul)        | 0.000694137 | 6.98915E-05 | -0.505028288 | NA             | NA                         |

Table S7

| Test | Feature1                                               | Feature2                                      | CORONA_Q    | CORONA_LRP  | CORONA_R     | Feature1CORONA | Feature2CORONA       |
|------|--------------------------------------------------------|-----------------------------------------------|-------------|-------------|--------------|----------------|----------------------|
| m.i  | M00630: D-Galacturonate degradation (fungi), D-galac   | 5_CD62L+ CD45RO- CD25- CD4+ CD8- CD3+ (ul)    | 0.021379685 | 0.045033678 | -0.470953868 | NA             | DEPLETED-ENRICHED-NS |
| m.i  | M00630: D-Galacturonate degradation (fungi), D-galac   | 8_TNFa- IL-2- % IL-17a+ CD3+                  | 0.00190549  | 0.012719311 | 0.533708487  | NA             | ENRICHED-DEPLETED-NS |
| m.i  | M00630: D-Galacturonate degradation (fungi), D-galac   | 4_CD56high CD16+ % CD3-                       | 0.01630166  | 0.007781374 | -0.419008725 | NA             | NA                   |
| m.i  | M00630: D-Galacturonate degradation (fungi), D-galac   | 8_TNFa+ IL-2+ % IL-17a+ CD3+                  | 0.00616564  | 0.012256338 | -0.510137254 | NA             | NA                   |
| m.i  | M00630: D-Galacturonate degradation (fungi), D-galac   | 8_TNFa+ IL-5+ % IL-17a+ CD3+                  | 0.004950879 | 0.035351617 | -0.514677918 | NA             | NS-ENRICHED-NS       |
| m.i  | M00630: D-Galacturonate degradation (fungi), D-galac   | 5_CD62L- CD45RO- CD25+ CD4+ CD8- CD3+ (ul)    | 0.0223273   | 0.009268995 | -0.448130211 | NA             | DEPLETED-ENRICHED-NS |
| m.i  | M00630: D-Galacturonate degradation (fungi), D-galac   | 10_CD69+ % Va7.2+ CD161+ CD4- CD8- CD3+       | 0.044337692 | 0.001467838 | -0.453107368 | NA             | NA                   |
| m.i  | M00630: D-Galacturonate degradation (fungi), D-galac   | 5_CD24+ CD45RO- % CD25+ CD4+ CD4high CD8-     | 0.024177827 | 0.041820048 | -0.467311726 | NA             | NA                   |
| m.i  | M00214: Methyl-galactoside transport system            | 5_CD62L- CD45RO- CD25+ CD4+ CD8- CD3+ (ul)    | 0.036826109 | 0.02964622  | 0.412883254  | NA             | DEPLETED-ENRICHED-NS |
| m.i  | M00612: Anoxygenic photosynthesis in purple bacteria   | 3_HLA-DR- % CD4dim/-                          | 0.030929309 | 0.020183152 | 0.431459238  | NA             | NA                   |
| m.i  | M00612: Anoxygenic photosynthesis in purple bacteria   | 3_HLA-DR-CD4dim/- (ul)                        | 0.007796352 | 0.028685947 | 0.487833394  | NA             | NA                   |
| m.i  | M00612: Anoxygenic photosynthesis in purple bacteria   | 3_HLA-DR+ % CD4dim/-                          | 0.030929309 | 0.020183152 | -0.431459238 | NA             | NA                   |
| m.i  | M00386: Cul4-DDB1-CSA complex                          | 2_CD31+ CD45RA- % -CD25high CD127low CD4+     | 0.018844175 | 0.000543184 | 0.478038725  | NA             | NA                   |
| m.i  | MF0067: PHB production                                 | 6_CD27bright CD161+ CCR6+ % CXCR3- CD25- CD4+ | 0.028363724 | 0.040932268 | -0.450135721 | NA             | NA                   |
| m.i  | M00487: CitS-CitT (magnesium-citrate transport) two-c  | 6_CD161+ CCR6- CXCR3- CD25- CD4+ (ul)         | 0.002367711 | 0.024491928 | 0.52258754   | NA             | NA                   |
| m.i  | M00811: Nicotine degradation, pyrrolidine pathway, nic | 6_CD27- CXCR3+ CD25- CD4+ (ul)                | 0.047797621 | 0.012645705 | 0.414536842  | NA             | NA                   |
| m.i  | M00811: Nicotine degradation, pyrrolidine pathway, nic | 1_CD19+ %                                     | 0.030700159 | 0.004306215 | -0.430396197 | NA             | DEPLETED-ENRICHED-NS |
| m.i  | M00273: PTS system, fructose-specific II component     | 5_CD8_Tem/Tcm                                 | 0.034002732 | 0.000636418 | 0.468944099  | NA             | NA                   |
| m.i  | M00038: Tryptophan metabolism, tryptophan => kynun     | 8_TNFa- IL-5- IL-17a+ % CD3+                  | 0.048401757 | 0.003816958 | 0.422737128  | NA             | NA                   |
| m.i  | M00038: Tryptophan metabolism, tryptophan => kynun     | 8_GM-CSF- IL-2- IL-17a+ CD4+ CD3+ (ul)        | 0.017213929 | 0.029479057 | 0.487983997  | NA             | DEPLETED-ENRICHED-NS |
| m.i  | M00038: Tryptophan metabolism, tryptophan => kynun     | 2_FoxP3- CD45RA+ % CD25high CD127low CD4+     | 0.032096926 | 0.026453545 | -0.414918534 | NA             | NA                   |
| m.i  | M00038: Tryptophan metabolism, tryptophan => kynun     | 8_IL-10- IL-2- IL-17a+ CD4+ CD3+ (ul)         | 0.002604245 | 0.021303863 | 0.527608034  | NA             | DEPLETED-ENRICHED-NS |
| m.i  | M00038: Tryptophan metabolism, tryptophan => kynun     | 8_IL-10- IL-2- IL-17a+ % CD3+                 | 0.031530251 | 0.045797391 | 0.466192164  | NA             | DEPLETED-NS-NS       |
| m.i  | M00038: Tryptophan metabolism, tryptophan => kynun     | 8_TNFa- IL-5- IL-17a+ CD4+ CD3+ (ul)          | 0.014140912 | 0.034788031 | 0.476694161  | NA             | NA                   |
| m.i  | M00489: DctS-DctR (C4-dicarboxylate transport) two-c   | 6_CD161- CCR6- CXCR3- CD25- CD4+ (ul)         | 0.04852437  | 0.041912682 | 0.423236442  | NA             | DEPLETED-ENRICHED-NS |
| m.i  | M00489: DctS-DctR (C4-dicarboxylate transport) two-c   | 6_CD161- CCR6- % CXCR3- CD25- CD4+            | 0.032754992 | 0.003454281 | 0.427310683  | NA             | NA                   |
| m.i  | M00088: Ketone body biosynthesis, acetyl-CoA => ace    | 5_CD62L- CD45RO- CD25+ CD4+ % CD4high CD8-    | 0.021330827 | 0.009918479 | 0.442368894  | NA             | NA                   |
| m.i  | M00088: Ketone body biosynthesis, acetyl-CoA => ace    | 5_CD62L- CD45RO- CD25+ CD4+ CD8- CD3+ (ul)    | 0.0223273   | 0.005727216 | 0.478065175  | NA             | DEPLETED-ENRICHED-NS |
| m.i  | M00088: Ketone body biosynthesis, acetyl-CoA => ace    | 5_CD24- CD45RO+ CD25- CD4+ % CD4high CD8-     | 0.00084938  | 0.047769774 | -0.535921443 | NA             | NS-DEPLETED-DEPLETED |
| m.i  | M00088: Ketone body biosynthesis, acetyl-CoA => ace    | 5_CD62L- CD45RO- % CD25+ CD4+ CD4high CD8-    | 0.009626435 | 0.003681922 | 0.500713024  | NA             | NA                   |
| m.i  | MF0098: methanogenesis from carbon dioxide             | 5_CD62L+ CD45RO- CD8+ CD4- CD3+ (ul)          | 0.015717614 | 0.000279255 | -0.482192932 | NA             | DEPLETED-NS-NS       |
| m.i  | M00042: Catecholamine biosynthesis, tyrosine => dop;   | 5_CD4_Tcm/Tn                                  | 0.02598907  | 0.045423559 | 0.433092252  | NA             | NA                   |
| m.i  | M00121: Heme biosynthesis, glutamate => protoheme;     | 3_CD11c+ CD14- CD16- % HLA-DR+ CD4dim/-       | 0.016635718 | 0.021302527 | 0.454104515  | NA             | NA                   |
| m.i  | M00121: Heme biosynthesis, glutamate => protoheme;     | 1_CD3+ %                                      | 0.041546092 | 0.007214081 | 0.421926668  | NA             | DEPLETED-ENRICHED-NS |
| m.i  | M00121: Heme biosynthesis, glutamate => protoheme;     | 3_HLA-DR+ CD4dim/- %                          | 0.000876028 | 0.044152868 | -0.514633345 | NA             | ENRICHED-NS-NS       |
| m.i  | M00121: Heme biosynthesis, glutamate => protoheme;     | 3_CD14hi CD16- HLA-DR+ CD16+/HLA-DR- CD16-%   | 0.004442856 | 0.008033347 | -0.487271067 | NA             | ENRICHED-DEPLETED-NS |
| m.i  | M00121: Heme biosynthesis, glutamate => protoheme;     | 3_CD14hi CD16- % HLA-DR+ CD16+/HLA-DR- CD16-  | 0.002899939 | 0.002425431 | -0.49700391  | NA             | ENRICHED-DEPLETED-NS |
| m.i  | M00730: Cationic antimicrobial peptide (CAMP) resista  | 2_FoxP3+ CD45RA- CD25high CD127low % CD4+     | 0.017054776 | 0.013031963 | -0.480329996 | NA             | NA                   |
| m.i  | M00658: VanS-VanR (actinomycete type vancomycin r      | 4_CD56dim CD16- % CD3-                        | 0.019868428 | 0.005808756 | 0.441549008  | NA             | ENRICHED-DEPLETED-NS |
| m.i  | M00658: VanS-VanR (actinomycete type vancomycin r      | 5_CD62L+ CD45RO- CD8+ CD4- CD3+ (ul)          | 0.000127272 | 0.043170606 | 0.58204289   | NA             | DEPLETED-NS-NS       |
| m.i  | M00658: VanS-VanR (actinomycete type vancomycin r      | 4_CD56dim CD16- CD3- %2                       | 0.019868428 | 0.005808756 | 0.441549008  | NA             | NA                   |
| m.i  | M00100: Sphingosine degradation                        | 0_IL-17a- IFNg- % TCRgd+ CD3+                 | 0.046758704 | 0.000989995 | -0.43732186  | NA             | NA                   |
| m.i  | M00100: Sphingosine degradation                        | 4_CD56dim CD16high CD56+ CD3- %               | 0.040206174 | 0.012252802 | -0.468447402 | NA             | NA                   |
| m.i  | M00100: Sphingosine degradation                        | 4_CD56dim CD16+ % CD3-                        | 0.012885345 | 0.043493317 | -0.45397159  | NA             | NA                   |
| m.i  | M00100: Sphingosine degradation                        | 0_IL-17a- IFNg+ TCRgd+ %CD3+                  | 0.045003306 | 0.000482107 | 0.419727034  | NA             | NA                   |
| m.i  | M00100: Sphingosine degradation                        | 0_IL-17a- IFNg+ % TCRgd+ CD3+                 | 0.012885345 | 0.000579012 | 0.47251633   | NA             | NA                   |
| m.i  | M00100: Sphingosine degradation                        | 4_CD56dim CD16+ CD3- %                        | 0.012885345 | 0.043493317 | -0.45397159  | NA             | NA                   |
| m.i  | M00100: Sphingosine degradation                        | 4_CD56dim CD16+ CD3- (ul)                     | 0.014499078 | 0.011763448 | -0.445386367 | NA             | NA                   |
| m.i  | M00178: Ribosome, bacteria                             | 3_HLA-DR-CD4dim/- (ul)                        | 0.00121067  | 0.014267633 | 0.50540738   | NA             | NA                   |
| m.i  | M00178: Ribosome, bacteria                             | 2_FoxP3+ CD45RA- % CD25high CD127low CD4+     | 0.000767742 | 0.049554389 | -0.517333042 | NA             | NA                   |
| m.i  | M00178: Ribosome, bacteria                             | 4_CD56dim CD16+ % CD3-                        | 0.035514881 | 0.034963205 | 0.364499982  | NA             | NA                   |
| m.i  | M00178: Ribosome, bacteria                             | 1_CD4- CD8+ CD3+ (ul)                         | 0.028709978 | 0.01607389  | 0.377420533  | NA             | NA                   |
| m.i  | M00178: Ribosome, bacteria                             | 4_CD56dim CD16+ CD3- %                        | 0.035514881 | 0.034963205 | 0.364499982  | NA             | NA                   |
| m.i  | M00224: Fluoroquinolone transport system               | 5_CD62L- CD45RO+ CD8+ CD4- CD3+ (ul)          | 0.012778336 | 0.02724659  | -0.482395084 | NA             | DEPLETED-ENRICHED-NS |

Table S7

| Test | Feature1                                             | Feature2                                   | CORONA_Q    | CORONA_LRP  | CORONA_R     | Feature1CORONA | Feature2CORONA       |
|------|------------------------------------------------------|--------------------------------------------|-------------|-------------|--------------|----------------|----------------------|
| m.i  | M00676: PI3K-Akt signaling                           | 10_CD69+ Va7.2+ CD161+ % CD4- CD8- CD3+    | 0.016675733 | 0.00617269  | 0.483619478  | NA             | NA                   |
| m.i  | M00676: PI3K-Akt signaling                           | 10_CD69+ Va7.2+ CD161+ CD4- CD8- % CD3+    | 0.014182733 | 0.003500969 | 0.492282698  | NA             | NA                   |
| m.i  | M00676: PI3K-Akt signaling                           | 4_CD56dim CD16+ CD3- (ul)                  | 0.039569564 | 0.030264345 | 0.359703687  | NA             | NA                   |
| m.i  | M00676: PI3K-Akt signaling                           | 0_IL-17a- IFNg+ % TCRgd+ CD3+              | 0.025130544 | 0.043732788 | -0.441269696 | NA             | NA                   |
| m.i  | M00676: PI3K-Akt signaling                           | 5_CD62L+ CD45RO- % CD8+ CD4-               | 0.034705421 | 0.004747002 | 0.413990281  | NA             | DEPLETED-NS-NS       |
| m.i  | MF0053: allose degradation                           | 3_HLA-DR-CD4dim/- (ul)                     | 0.025109312 | 0.010331525 | 0.471354452  | NA             | NA                   |
| m.i  | MF0100: Sulfate reduction (dissimilatory)            | 5_CD62L+ CD45RO+ CD8+ CD4- CD3+ (ul)       | 0.000868933 | 0.021093867 | -0.550164414 | NA             | NA                   |
| m.i  | M00628: beta-Lactam resistance, AmpC system          | 2_FoxP3+ CD45RA- CD25high CD127low % CD4+  | 0.020483949 | 0.028449754 | 0.456115032  | NA             | NA                   |
| m.i  | M00628: beta-Lactam resistance, AmpC system          | 3_HLA-DR-CD4dim/- (ul)                     | 0.025697278 | 0.015500685 | -0.402557545 | NA             | NA                   |
| m.i  | M00700: Multidrug resistance, efflux pump AbcA       | 5_CD62L- CD45RO- CD25+ CD4+ CD8- CD3+ (ul) | 0.0223273   | 0.031607779 | 0.459479286  | NA             | DEPLETED-ENRICHED-NS |
| m.i  | M00700: Multidrug resistance, efflux pump AbcA       | 3_CD4high %                                | 0.0121524   | 0.004917684 | 0.468643519  | NA             | DEPLETED-NS-NS       |
| m.i  | M00700: Multidrug resistance, efflux pump AbcA       | 5_CD62L+ CD45RO- CD25- CD4+ % CD4high CD8- | 0.046854563 | 0.010169432 | 0.414312205  | NA             | NA                   |
| m.i  | M00700: Multidrug resistance, efflux pump AbcA       | 5_CD62L+ CD45RO- CD25- CD4+ CD8- CD3+ (ul) | 0.027185971 | 0.000379753 | 0.451199796  | NA             | DEPLETED-ENRICHED-NS |
| m.i  | M00700: Multidrug resistance, efflux pump AbcA       | 5_CD62L+ CD45RO- CD8+ CD4- CD3+ (ul)       | 0.006512914 | 0.018633357 | 0.465449364  | NA             | DEPLETED-NS-NS       |
| m.i  | M00700: Multidrug resistance, efflux pump AbcA       | 5_CD8_Tem/Tn                               | 0.011615508 | 0.046279495 | -0.481215233 | NA             | NA                   |
| m.i  | M00700: Multidrug resistance, efflux pump AbcA       | 5_CD62L+ CD45RO- % CD8+ CD4-               | 0.000416413 | 0.001526076 | 0.555602243  | NA             | DEPLETED-NS-NS       |
| m.i  | M00700: Multidrug resistance, efflux pump AbcA       | 5_CD62L+ CD45RO- CD25+ CD4+ CD8- CD3+ (ul) | 0.021531705 | 0.015874215 | 0.45698836   | NA             | DEPLETED-ENRICHED-NS |
| m.i  | M00700: Multidrug resistance, efflux pump AbcA       | 5_CD8_Teff/Tn                              | 0.00207503  | 0.000561491 | -0.518282379 | NA             | NA                   |
| m.i  | M00179: Ribosome, archaea                            | 3_HLA-DR-CD4dim/- (ul)                     | 0.002200087 | 0.038302917 | 0.488125685  | NA             | NA                   |
| m.i  | M00179: Ribosome, archaea                            | 2_FoxP3+ CD45RA- % CD25high CD127low CD4+  | 0.001367121 | 0.034737014 | -0.499429084 | NA             | NA                   |
| m.i  | M00179: Ribosome, archaea                            | 2_FoxP3+ CD39+ % CD25high CD127low CD4+    | 0.015209134 | 0.03054765  | -0.411429932 | NA             | NA                   |
| m.i  | M00179: Ribosome, archaea                            | 2_FoxP3+ CD39+ CD25high CD127low % CD4+    | 0.002996638 | 0.012899407 | -0.472442247 | NA             | NA                   |
| m.i  | M00476: ComP-ComA (competence) two-component r       | 7_Helios+ IFNg+ CD4+ CD3+ (ul)             | 0.049809928 | 0.001889528 | -0.435108154 | NA             | NA                   |
| m.i  | M00376: 3-Hydroxypropionate bi-cycle                 | 4_CD56high CD16+ % CD3-                    | 0.006534116 | 0.029876147 | -0.450029238 | NA             | NA                   |
| m.i  | M00376: 3-Hydroxypropionate bi-cycle                 | 3_HLA-DR-CD4dim/- (ul)                     | 0.005845688 | 0.025505567 | -0.464303982 | NA             | NA                   |
| m.i  | M00376: 3-Hydroxypropionate bi-cycle                 | 4_CD56high CD16+ CD3- %                    | 0.006534116 | 0.029876147 | -0.450029238 | NA             | NA                   |
| m.i  | M00376: 3-Hydroxypropionate bi-cycle                 | 4_CD56high CD16+ CD3- (ul)                 | 0.006035011 | 0.037951651 | -0.45226351  | NA             | NA                   |
| m.i  | M00296: BER complex                                  | 2_CD39+ CD31- CD25high CD127low CD4+ (ul)  | 0.005115501 | 0.039965631 | -0.454158407 | NA             | DEPLETED-NS-NS       |
| m.i  | M00296: BER complex                                  | 5_CD62L- CD45RO- CD25- CD4+ % CD4high CD8- | 0.017440727 | 0.011831301 | 0.462131597  | NA             | ENRICHED-NS-NS       |
| m.i  | M00296: BER complex                                  | 5_CD62L- CD45RO- % CD25- CD4+ CD4high CD8- | 0.027490198 | 0.017911021 | 0.45092092   | NA             | ENRICHED-NS-NS       |
| m.i  | M00296: BER complex                                  | 5_CD4_Teff/Treg                            | 0.006089614 | 0.001547236 | 0.498878513  | NA             | ENRICHED-NS-NS       |
| m.i  | M00296: BER complex                                  | 5_CD4_Teff/2_Treg                          | 0.013479266 | 0.00444391  | 0.503309191  | NA             | NA                   |
| m.i  | M00296: BER complex                                  | 2_FoxP3+ CD39+ CD25high CD127low CD4+ (ul) | 0.00337659  | 0.023320304 | -0.485623967 | NA             | NA                   |
| m.i  | M00296: BER complex                                  | 5_CD4_Tcm/Tn                               | 0.017252416 | 0.035792646 | -0.423132361 | NA             | NA                   |
| m.i  | MF0052: chondroitin sulfate and dermatan sulfate deg | 4_CD56high CD16+ CD3- (ul)                 | 0.034349174 | 0.010994328 | -0.387080274 | NA             | NA                   |
| m.i  | MF0052: chondroitin sulfate and dermatan sulfate deg | 3_HLA-DR-CD4dim/- (ul)                     | 0.009923068 | 0.015433301 | -0.482097187 | NA             | NA                   |
| m.i  | M00583: Putative peptide transport system            | 6_CD161+ CCR6- CXCR3- % CD25+ CD4+         | 0.02886861  | 0.029827435 | -0.459738051 | NA             | NA                   |
| m.i  | M00583: Putative peptide transport system            | 6_CD161+ CCR6- % CXCR3- CD25+ CD4+         | 0.037144172 | 0.024836781 | -0.470322818 | NA             | NA                   |
| m.i  | MF0041: histidine degradation                        | 3_HLA-DR-CD4dim/- (ul)                     | 0.047817454 | 0.011088799 | -0.427950311 | NA             | NA                   |
| m.i  | MF0041: histidine degradation                        | 1_CD4- CD8+ CD3+ (ul)                      | 0.007146804 | 0.012830303 | -0.48987943  | NA             | NA                   |
| m.i  | M00220: Rhamnose transport system                    | 4_CD56high CD16+ CD3- %                    | 0.035646091 | 0.040964437 | -0.383937955 | NA             | NA                   |
| m.i  | M00220: Rhamnose transport system                    | 5_CD24+ CD45RO+ CD25- CD4+ CD8- CD3+ (ul)  | 0.013731292 | 0.049798621 | -0.455484614 | NA             | NA                   |
| m.i  | M00220: Rhamnose transport system                    | 0_IL-17a- IFNg+ TCRgd+ %CD3+               | 0.020502166 | 0.021585321 | 0.445420831  | NA             | NA                   |
| m.i  | M00220: Rhamnose transport system                    | 4_CD56high CD16+ % CD3-                    | 0.035646091 | 0.040964437 | -0.383937955 | NA             | NA                   |
| m.i  | M00140: C1-unit interconversion, prokaryotes         | 3_HLA-DR+ CD4dim/- %                       | 0.020364455 | 0.039497932 | -0.415250832 | NA             | ENRICHED-NS-NS       |
| m.i  | M00140: C1-unit interconversion, prokaryotes         | 3_HLA-DR-CD4dim/- (ul)                     | 0.000534904 | 0.019323319 | 0.559663866  | NA             | NA                   |
| m.i  | M00005: PRPP biosynthesis, ribose 5P => PRPP         | 1_CD4- CD8- %                              | 0.047619133 | 0.039426114 | 0.390543357  | NA             | NA                   |
| m.i  | M00613: Anoxygenic photosynthesis in green nonsulfu  | 4_CD56high CD16+ % CD3-                    | 0.006534116 | 0.029876147 | -0.450029238 | NA             | NA                   |
| m.i  | M00613: Anoxygenic photosynthesis in green nonsulfu  | 3_HLA-DR-CD4dim/- (ul)                     | 0.005845688 | 0.025505567 | -0.464303982 | NA             | NA                   |
| m.i  | M00613: Anoxygenic photosynthesis in green nonsulfu  | 4_CD56high CD16+ CD3- %                    | 0.006534116 | 0.029876147 | -0.450029238 | NA             | NA                   |
| m.i  | M00613: Anoxygenic photosynthesis in green nonsulfu  | 4_CD56high CD16+ CD3- (ul)                 | 0.006035011 | 0.037951651 | -0.45226351  | NA             | NA                   |
| m.i  | M00639: Multidrug resistance, efflux pump MexCD-Op   | 5_CD4_Tcm/Treg                             | 0.049440447 | 0.002296439 | -0.368781826 | NA             | ENRICHED-NS-ENRICHED |
| m.i  | M00713: Fluoroquinolone resistance, efflux pump LfrA | 8_TNFa+ IL-5- IL-17a+ % CD3+               | 0.048104392 | 0.001032574 | -0.447034785 | NA             | NA                   |
| m.i  | M00342: Bacterial proteasome                         | 3_CD14hi CD16- HLA-DR+ CD16+HLA-DR- CD16-% | 0.027253377 | 0.029091677 | -0.423945116 | NA             | ENRICHED-DEPLETED-NS |

Table S7

| Test | Feature1                                                 | Feature2                                     | CORONA_Q    | CORONA_LRP  | CORONA_R     | Feature1CORONA | Feature2CORONA       |
|------|----------------------------------------------------------|----------------------------------------------|-------------|-------------|--------------|----------------|----------------------|
| m.i  | M00342: Bacterial proteasome                             | 3_CD14hi CD16- % HLA-DR+ CD16+/HLA-DR- CD16- | 0.027253377 | 0.022576051 | -0.432921037 | NA             | ENRICHED-DEPLETED-NS |
| m.i  | MF0078: xylitol degradation                              | 5_CD24+ CD45RO+ CD25- CD4+ % CD4high CD8-    | 0.018646871 | 0.004436189 | -0.468693478 | NA             | NA                   |
| m.i  | MF0078: xylitol degradation                              | 5_CD24+ CD45RO- % CD25+ CD4+ CD4high CD8-    | 0.046761988 | 0.019624707 | -0.414367736 | NA             | NA                   |
| m.i  | MF0078: xylitol degradation                              | 5_CD24+ CD45RO+ % CD25- CD4+ CD4high CD8-    | 0.021633291 | 0.003454121 | -0.471364235 | NA             | NA                   |
| m.i  | MF0078: xylitol degradation                              | 5_CD24+ CD45RO+ CD25- CD4+ CD8- CD3+ (ul)    | 0.003975378 | 0.000931132 | -0.512029814 | NA             | NA                   |
| m.i  | M00123: Biotin biosynthesis, pimeloyl-ACP/CoA => bic 4   | CD56high CD16+ CD3- (ul)                     | 0.003046984 | 0.001693052 | -0.490701159 | NA             | NA                   |
| m.i  | M00123: Biotin biosynthesis, pimeloyl-ACP/CoA => bic 4   | CD56dim CD16+ CD3- %                         | 0.00086755  | 0.02666234  | -0.528755161 | NA             | NA                   |
| m.i  | M00123: Biotin biosynthesis, pimeloyl-ACP/CoA => bic 4   | CD56high CD16+ CD3- %                        | 0.004249223 | 0.00245979  | -0.469633857 | NA             | NA                   |
| m.i  | M00123: Biotin biosynthesis, pimeloyl-ACP/CoA => bic 2   | FoxP3+ CD45RA- CD25high CD127low % CD4+      | 0.039290295 | 0.005784377 | 0.382084264  | NA             | NA                   |
| m.i  | M00123: Biotin biosynthesis, pimeloyl-ACP/CoA => bic 4   | CD56dim CD16+ % CD3-                         | 0.00086755  | 0.02666234  | -0.528755161 | NA             | NA                   |
| m.i  | M00123: Biotin biosynthesis, pimeloyl-ACP/CoA => bic 2   | FoxP3+ CD45RA- % CD25high CD127low CD4+      | 0.001090182 | 0.036105315 | 0.505421429  | NA             | NA                   |
| m.i  | M00123: Biotin biosynthesis, pimeloyl-ACP/CoA => bic 4   | CD56high CD16+ % CD3-                        | 0.004249223 | 0.00245979  | -0.469633857 | NA             | NA                   |
| m.i  | M00123: Biotin biosynthesis, pimeloyl-ACP/CoA => bic 3   | HLA-DR-CD4dim/- (ul)                         | 0.003000981 | 0.013781396 | -0.478735842 | NA             | NA                   |
| m.i  | MF0073: sorbitol degradation (dehydrogenase)             | 1_CD4- CD8- %                                | 0.010741562 | 0.041793323 | 0.466867032  | NA             | NA                   |
| m.i  | M00045: Histidine degradation, histidine => N-formimr    | 3_HLA-DR-CD4dim/- (ul)                       | 0.023910663 | 0.010561461 | -0.445656245 | NA             | NA                   |
| m.i  | M00045: Histidine degradation, histidine => N-formimr    | 5_CD62L- CD45RO- CD8+ CD4- CD3+ (ul)         | 0.048457331 | 0.040216866 | -0.413047251 | NA             | NA                   |
| m.i  | M00045: Histidine degradation, histidine => N-formimr    | 1_CD4- CD8+ CD3+ (ul)                        | 0.006224334 | 0.017031867 | -0.498323879 | NA             | NA                   |
| m.i  | M00037: Melatonin biosynthesis, tryptophan => seroto1    | CD19+ %                                      | 0.03398845  | 0.021380184 | 0.464149668  | NA             | DEPLETED-ENRICHED-NS |
| m.i  | M00037: Melatonin biosynthesis, tryptophan => seroto3    | HLA-DR-CD4dim/- (ul)                         | 0.043989287 | 0.046362913 | -0.421941083 | NA             | NA                   |
| m.i  | M00733: GraS-GraR (cationic antimicrobial peptide tra 2  | FoxP3+ CD45RA- CD25high CD127low % CD4+      | 0.002968184 | 0.023917867 | -0.518025837 | NA             | NA                   |
| m.i  | M00733: GraS-GraR (cationic antimicrobial peptide tra 2  | CD25high CD127low % CD4+                     | 0.024950824 | 0.038623574 | -0.444569309 | NA             | NA                   |
| m.i  | M00433: Lysine biosynthesis, 2-oxoglutarate => 2-oxo:3   | HLA-DR+ CD16+/HLA-DR- CD16- %                | 0.032509447 | 0.002811932 | -0.465218475 | NA             | NA                   |
| m.i  | M00662: HK1-Rrp1 (glycerol uptake and utilization) twc 1 | CD19+ %                                      | 0.02471006  | 0.047645948 | 0.431495189  | NA             | DEPLETED-ENRICHED-NS |
| m.i  | M00033: Ectoine biosynthesis, aspartate => ectoine       | 5_CD62L- CD45RO- % CD25+ CD4+ CD4high CD8-   | 0.025871248 | 0.03549681  | 0.402406937  | NA             | NA                   |
| m.i  | M00033: Ectoine biosynthesis, aspartate => ectoine       | 3_CD14hi CD16- % HLA-DR+ CD16+/HLA-DR- CD16- | 0.025871248 | 0.003013268 | -0.404832154 | NA             | ENRICHED-DEPLETED-NS |
| m.i  | M00033: Ectoine biosynthesis, aspartate => ectoine       | 3_CD14hi CD16- HLA-DR+ CD16+/HLA-DR- CD16-   | 0.029524093 | 0.010065217 | -0.389635896 | NA             | ENRICHED-DEPLETED-NS |
| m.i  | M00033: Ectoine biosynthesis, aspartate => ectoine       | 5_CD62L- CD45RO- CD25+ CD4+ CD8- CD3+ (ul)   | 0.027138219 | 0.011006568 | 0.40980035   | NA             | DEPLETED-ENRICHED-NS |
| m.i  | M00033: Ectoine biosynthesis, aspartate => ectoine       | 5_CD62L- CD45RO- CD25+ CD4+ % CD4high CD8-   | 0.025871248 | 0.030824808 | 0.406843311  | NA             | NA                   |
| m.i  | M00165: Reductive pentose phosphate cycle (Calvin c 3    | HLA-DR-CD4dim/- (ul)                         | 0.007796352 | 0.028685947 | 0.487833394  | NA             | NA                   |
| m.i  | M00165: Reductive pentose phosphate cycle (Calvin c 3    | HLA-DR+ % CD4dim/-                           | 0.030929309 | 0.020183152 | -0.431459238 | NA             | NA                   |
| m.i  | M00165: Reductive pentose phosphate cycle (Calvin c 3    | HLA-DR- % CD4dim/-                           | 0.030929309 | 0.020183152 | 0.431459238  | NA             | NA                   |
| m.i  | MF0033: cysteine degradation (mercaptopyruvate pat       | 7_Helios- IFNg+ CD4+ CD3+ (ul)               | 0.03558221  | 0.000232832 | 0.47274388   | NA             | NA                   |
| m.i  | MF0033: cysteine degradation (mercaptopyruvate pat       | 7_IFNg+ IL-17a- CD4+ CD3+ (ul)               | 0.019601117 | 0.000119949 | 0.489550603  | NA             | NA                   |
| m.i  | M00493: AlgZ-AlgR (alginate production) two-compon       | 2_FoxP3+ CD31- % CD25high CD127low CD4+      | 0.007851957 | 0.047101937 | 0.480898181  | NA             | NA                   |
| m.i  | M00493: AlgZ-AlgR (alginate production) two-compon       | 2_FoxP3+ % CD25high CD127low CD4+            | 0.048091689 | 0.01694555  | 0.434103431  | NA             | NA                   |
| m.i  | M00436: Sulfonate transport system                       | 0_IL-17a- IFNg+ TCRgd+ %CD3+                 | 0.03964966  | 0.018601761 | 0.44979949   | NA             | NA                   |
| m.i  | M00569: Catechol meta-cleavage, catechol => acetyl-(     | 5_CD62L+ CD45RO+ CD25- CD4+ % CD4high CD8-   | 0.013096273 | 0.023461863 | -0.481155343 | NA             | NA                   |
| m.i  | M00569: Catechol meta-cleavage, catechol => acetyl-(     | 5_CD62+ CD45RO+ % CD25- CD4+ CD4high CD8-    | 0.018631383 | 0.023325658 | -0.477185323 | NA             | NA                   |
| m.i  | M00390: Exosome, archaea                                 | 3_HLA-DR+ CD16+/HLA-DR- CD16- %              | 0.037925745 | 0.001987309 | -0.444230138 | NA             | NA                   |
| m.i  | MF0081: Glycolysis (pay-off phase)                       | 3_CD14hi CD16- HLA-DR+ CD16+/HLA-DR- CD16-%  | 0.030810848 | 0.022314295 | -0.420583883 | NA             | ENRICHED-DEPLETED-NS |
| m.i  | MF0081: Glycolysis (pay-off phase)                       | 3_CD14hi CD16- % HLA-DR+ CD16+/HLA-DR- CD16- | 0.030080636 | 0.007557318 | -0.426216031 | NA             | ENRICHED-DEPLETED-NS |
| m.i  | MF0081: Glycolysis (pay-off phase)                       | 3_HLA-DR+ CD4dim/- %                         | 0.003765543 | 0.048325561 | -0.483160539 | NA             | ENRICHED-NS-NS       |
| m.i  | M00201: alpha-Glucoside transport system                 | 5_CD62L- CD45RO- CD25+ CD4+ CD8- CD3+ (ul)   | 0.0223273   | 0.018819638 | 0.427784091  | NA             | DEPLETED-ENRICHED-NS |
| m.i  | M00201: alpha-Glucoside transport system                 | 5_CD62L- CD45RO- CD25+ CD4+ % CD4high CD8-   | 0.021330827 | 0.033352596 | 0.424868848  | NA             | NA                   |
| m.i  | M00201: alpha-Glucoside transport system                 | 5_CD62L- CD45RO- % CD25+ CD4+ CD4high CD8-   | 0.021328337 | 0.022560761 | 0.419545775  | NA             | NA                   |
| m.i  | MF0047: lactose and galactose degradation (PTS)          | 5_CD62L- CD45RO- % CD25+ CD4+ CD4high CD8-   | 0.0304786   | 0.049377979 | 0.433953126  | NA             | NA                   |
| m.i  | MF0047: lactose and galactose degradation (PTS)          | 5_CD62L- CD45RO- CD25+ CD4+ % CD4high CD8-   | 0.0304786   | 0.038197465 | 0.418556456  | NA             | NA                   |
| m.i  | M00467: SasA-RpaAB (circadian timing mediating) twc 4    | CD8+ CD4+ % CD56+ CD3+                       | 0.049735739 | 0.046333744 | -0.446187442 | NA             | NA                   |
| m.i  | M00467: SasA-RpaAB (circadian timing mediating) twc 5    | CD4+ CD8+ %                                  | 0.027038435 | 0.029386938 | -0.461331862 | NA             | NA                   |
| m.i  | MF0079: bifidobacterium shunt                            | 3_HLA-DR+ CD4dim/- %                         | 0.016182777 | 0.010556066 | -0.448262633 | NA             | ENRICHED-NS-NS       |
| m.i  | MF0079: bifidobacterium shunt                            | 3_HLA-DR+ % CD4dim/-                         | 0.005191073 | 0.015689382 | -0.491491209 | NA             | NA                   |
| m.i  | MF0079: bifidobacterium shunt                            | 1_CD3+ %                                     | 0.041546092 | 0.00212511  | 0.422803589  | NA             | DEPLETED-ENRICHED-NS |
| m.i  | MF0079: bifidobacterium shunt                            | 3_CD14hi CD16- % HLA-DR+ CD16+/HLA-DR- CD16- | 0.036705497 | 0.007380223 | -0.410720158 | NA             | ENRICHED-DEPLETED-NS |
| m.i  | MF0079: bifidobacterium shunt                            | 3_CD14hi CD16- HLA-DR+ CD16+/HLA-DR- CD16-%  | 0.036705497 | 0.013194771 | -0.40758164  | NA             | ENRICHED-DEPLETED-NS |

Table S7

| Test | Feature1                                                | Feature2                                     | CORONA_Q    | CORONA_LRP  | CORONA_R     | Feature1CORONA | Feature2CORONA       |
|------|---------------------------------------------------------|----------------------------------------------|-------------|-------------|--------------|----------------|----------------------|
| m.i  | MF0079: bifidobacterium shunt                           | 3_HLA-DR- % CD4dim/-                         | 0.005191073 | 0.015689382 | 0.491491209  | NA             | NA                   |
| m.i  | M00098: Acylglycerol degradation                        | 4_CD56high CD16+ CD3- (ul)                   | 0.004587896 | 0.011493159 | 0.46781457   | NA             | NA                   |
| m.i  | M00098: Acylglycerol degradation                        | 4_CD56high CD16+ CD3- %                      | 0.003018985 | 0.003104646 | 0.490905607  | NA             | NA                   |
| m.i  | M00098: Acylglycerol degradation                        | 4_CD56high CD16+ % CD3-                      | 0.003018985 | 0.003104646 | 0.490905607  | NA             | NA                   |
| m.i  | M00351: Spliceosome, U1-snRNP                           | 6_CD161- CCR6- CXCR3- CD25+ % CD4+           | 0.009475935 | 0.048728994 | 0.501051157  | NA             | NA                   |
| m.i  | M00351: Spliceosome, U1-snRNP                           | 5_CD8_Tem/Tcm                                | 0.009558128 | 0.024735433 | 0.461021747  | NA             | NA                   |
| m.i  | M00343: Archaeal proteasome                             | 5_CD24- CD45RO- % CD8+ CD4-                  | 0.038116241 | 0.000177087 | -0.461379662 | NA             | NS-DEPLETED-NS       |
| m.i  | M00206: Cellobiose transport system                     | 5_CD62L- CD45RO- % CD25+ CD4+ CD4high CD8-   | 0.034889192 | 0.027291482 | 0.39724672   | NA             | NA                   |
| m.i  | M00206: Cellobiose transport system                     | 5_CD62L- CD45RO- CD25+ CD4+ CD8- CD3+ (ul)   | 0.029066429 | 0.020211204 | 0.40818812   | NA             | DEPLETED-ENRICHED-NS |
| m.i  | M00293: DNA polymerase zeta complex                     | 3_HLA-DR+ CD4dim/- %                         | 0.047718743 | 0.024092301 | 0.332763944  | NA             | ENRICHED-NS-NS       |
| m.i  | M00293: DNA polymerase zeta complex                     | 5_CD62L- CD45RO- CD25- CD4+ CD8- CD3+ (ul)   | 0.022080064 | 0.013204545 | -0.46621239  | NA             | NA                   |
| m.i  | M00293: DNA polymerase zeta complex                     | 5_CD62L- CD45RO+ CD8+ CD4- CD3+ (ul)         | 0.029517088 | 0.006419381 | -0.36416449  | NA             | DEPLETED-ENRICHED-NS |
| m.i  | M00293: DNA polymerase zeta complex                     | 3_HLA-DR-CD4dim/- (ul)                       | 0.005073762 | 0.000259415 | -0.449807267 | NA             | NA                   |
| m.i  | M00293: DNA polymerase zeta complex                     | 6_CD161+ CCR6- CXCR3- CD25- CD4+ (ul)        | 0.023096368 | 0.018191856 | -0.432744478 | NA             | NA                   |
| m.i  | M00293: DNA polymerase zeta complex                     | 5_CD62L- CD45RO- CD8+ CD4- CD3+ (ul)         | 0.014293711 | 0.020114566 | -0.422715066 | NA             | NA                   |
| m.i  | M00293: DNA polymerase zeta complex                     | 3_CD11c+ CD14- CD16- HLA-DR+ CD4dim/- %      | 0.011309243 | 0.027558593 | 0.4734217    | NA             | ENRICHED-NS-NS       |
| m.i  | M00293: DNA polymerase zeta complex                     | 1_CD4- CD8+ CD3+ (ul)                        | 0.025820383 | 0.003390277 | -0.380332122 | NA             | NA                   |
| m.i  | M00004: Pentose phosphate pathway (Pentose phosph       | 9_IL2- TNFa- % Va7.2+ CD161 CD3+             | 0.01015369  | 0.005219791 | 0.499566097  | NA             | NA                   |
| m.i  | M00050: Guanine ribonucleotide biosynthesis IMP => (3   | HLA-DR+ CD4dim/- %                           | 0.001472791 | 0.014280194 | -0.509833295 | NA             | ENRICHED-NS-NS       |
| m.i  | M00050: Guanine ribonucleotide biosynthesis IMP => (5   | CD62L- CD45RO- CD25+ CD4+ % CD4high CD8-     | 0.040113462 | 0.027734615 | 0.374370134  | NA             | NA                   |
| m.i  | M00050: Guanine ribonucleotide biosynthesis IMP => (1   | CD3+ %                                       | 0.041039591 | 0.001094245 | 0.433184439  | NA             | DEPLETED-ENRICHED-NS |
| m.i  | MF0072: ribitol degradation                             | 3_CD14hi CD16- HLA-DR+ CD16+/HLA-DR- CD16-%  | 0.008662703 | 0.005717455 | -0.454430021 | NA             | ENRICHED-DEPLETED-NS |
| m.i  | MF0072: ribitol degradation                             | 3_HLA-DR-CD4dim/- %                          | 0.000472477 | 0.026419689 | 0.527071591  | NA             | NA                   |
| m.i  | MF0072: ribitol degradation                             | 3_CD14hi CD16- % HLA-DR+ CD16+/HLA-DR- CD16- | 0.008054706 | 0.004137848 | -0.446916964 | NA             | ENRICHED-DEPLETED-NS |
| m.i  | MF0072: ribitol degradation                             | 3_HLA-DR- % CD4dim/-                         | 9.52149E-05 | 0.000728087 | 0.586796262  | NA             | NA                   |
| m.i  | MF0072: ribitol degradation                             | 3_HLA-DR+ % CD4dim/-                         | 9.52149E-05 | 0.000728087 | -0.586796262 | NA             | NA                   |
| m.i  | MF0072: ribitol degradation                             | 3_HLA-DR+ CD4dim/- %                         | 0.000476154 | 0.00344593  | -0.527578332 | NA             | ENRICHED-NS-NS       |
| m.i  | MF0072: ribitol degradation                             | 3_HLA-DR-CD4dim/- (ul)                       | 0.007600579 | 0.008916555 | 0.446864096  | NA             | NA                   |
| m.i  | MF0018: proline degradation (glutamate pathway)         | 4_CD56high CD16+ % CD3-                      | 0.043101976 | 0.020113465 | -0.385750309 | NA             | NA                   |
| m.i  | MF0018: proline degradation (glutamate pathway)         | 2_FoxP3+ CD45RA- CD25high CD127low % CD4+    | 0.029782266 | 0.047812074 | 0.408583489  | NA             | NA                   |
| m.i  | MF0018: proline degradation (glutamate pathway)         | 4_CD56high CD16+ CD3- %                      | 0.043101976 | 0.020113465 | -0.385750309 | NA             | NA                   |
| m.i  | MF0018: proline degradation (glutamate pathway)         | 4_CD56high CD16+ CD3- (ul)                   | 0.043101976 | 0.020688384 | -0.382118129 | NA             | NA                   |
| m.i  | M00611: Oxygenic photosynthesis in plants and cyano     | 3_HLA-DR-CD4dim/- (ul)                       | 0.008685771 | 0.033031019 | 0.485275849  | NA             | NA                   |
| m.i  | M00611: Oxygenic photosynthesis in plants and cyano     | 3_HLA-DR+ % CD4dim/-                         | 0.034500884 | 0.024316111 | -0.428536196 | NA             | NA                   |
| m.i  | M00611: Oxygenic photosynthesis in plants and cyano     | 3_HLA-DR- % CD4dim/-                         | 0.034500884 | 0.024316111 | 0.428536196  | NA             | NA                   |
| m.i  | M00519: YesM-YesN two-component regulatory syster       | 5_CD62L+ CD45RO+ CD8+ CD4- CD3+ (ul)         | 0.006331935 | 0.00787506  | -0.508476434 | NA             | NA                   |
| m.i  | M00519: YesM-YesN two-component regulatory syster       | 3_CD14- CD16- HLA-DR+ % CD4dim/-             | 0.026819323 | 0.037984623 | 0.420159318  | NA             | DEPLETED-ENRICHED-NS |
| m.i  | M00519: YesM-YesN two-component regulatory syster       | 4_CD56dim CD16+ % CD3-                       | 0.026819323 | 0.01356047  | -0.420621872 | NA             | NA                   |
| m.i  | M00519: YesM-YesN two-component regulatory syster       | 3_CD14- CD16- HLA-DR+ CD4dim/- %             | 0.026819323 | 0.018233313 | 0.435311637  | NA             | NA                   |
| m.i  | M00519: YesM-YesN two-component regulatory syster       | 4_CD56dim CD16+ CD3- %                       | 0.026819323 | 0.01356047  | -0.420621872 | NA             | NA                   |
| m.i  | MF0026: cysteine biosynthesis/homocysteine degrada      | 3_CD14hi CD16- % HLA-DR+ CD16+/HLA-DR- CD16- | 0.002899939 | 0.032308462 | -0.496684144 | NA             | ENRICHED-DEPLETED-NS |
| m.i  | MF0026: cysteine biosynthesis/homocysteine degrada      | 3_CD14hi CD16- HLA-DR+ CD16+/HLA-DR- CD16-%  | 0.004442856 | 0.037615218 | -0.491335763 | NA             | ENRICHED-DEPLETED-NS |
| m.i  | M00256: Cell division transport system                  | 3_HLA-DR- % CD4dim/-                         | 0.000410033 | 0.009919445 | 0.543142664  | NA             | NA                   |
| m.i  | M00256: Cell division transport system                  | 4_CD56high CD16+ CD3- (ul)                   | 0.045110635 | 0.000646043 | 0.369180178  | NA             | NA                   |
| m.i  | M00256: Cell division transport system                  | 4_CD56high CD16+ CD3- %                      | 0.04107511  | 0.001177226 | 0.381599265  | NA             | NA                   |
| m.i  | M00256: Cell division transport system                  | 3_HLA-DR-CD4dim/- (ul)                       | 0.005067925 | 0.002091385 | 0.474227934  | NA             | NA                   |
| m.i  | M00256: Cell division transport system                  | 4_CD56high CD16+ % CD3-                      | 0.04107511  | 0.001177226 | 0.381599265  | NA             | NA                   |
| m.i  | M00256: Cell division transport system                  | 3_HLA-DR+ CD4dim/- %                         | 0.005067925 | 0.046239567 | -0.47113953  | NA             | ENRICHED-NS-NS       |
| m.i  | M00256: Cell division transport system                  | 3_HLA-DR+ % CD4dim/-                         | 0.000410033 | 0.009919445 | -0.543142664 | NA             | NA                   |
| m.i  | M00079: Keratan sulfate degradation                     | 3_HLA-DR-CD4dim/- (ul)                       | 0.045389821 | 0.019220973 | -0.413920351 | NA             | NA                   |
| m.i  | M00079: Keratan sulfate degradation                     | 1_CD4- CD8+ CD3+ (ul)                        | 0.007504148 | 0.01340444  | -0.504676653 | NA             | NA                   |
| m.i  | M00091: Phosphatidylcholine (PC) biosynthesis, PE => 10 | CD69+ Va7.2+ CD161+ CD4- CD8- CD3+ (ul)      | 0.025810824 | 0.015566631 | 0.478803125  | NA             | NA                   |
| m.i  | M00091: Phosphatidylcholine (PC) biosynthesis, PE => 10 | CD69+ Va7.2+ CD161+ CD4- CD8- % CD3+         | 0.047627207 | 0.028779302 | 0.43684027   | NA             | NA                   |
| m.i  | M00690: MAPK (ERK5) signaling                           | 1_CD4- CD8+ %                                | 0.029403944 | 0.009775161 | -0.430554945 | NA             | NA                   |



Table S7

| Test | Feature1                                               | Feature2                                     | CORONA_Q    | CORONA_LRP  | CORONA_R     | Feature1CORONA | Feature2CORONA       |
|------|--------------------------------------------------------|----------------------------------------------|-------------|-------------|--------------|----------------|----------------------|
| m.i  | M00734: BraS-BraR (bacitracin transport) two-compon    | 5_CD4_Tcm/Treg                               | 0.022178188 | 0.00089773  | -0.414940927 | NA             | ENRICHED-NS-ENRICHED |
| m.i  | M00059: Glycosaminoglycan biosynthesis, heparan su     | 2_FoxP3- CD45RA+ % CD25high CD127low CD4+    | 0.047999202 | 0.005972116 | 0.385640728  | NA             | NA                   |
| m.i  | M00059: Glycosaminoglycan biosynthesis, heparan su     | 9_IFNg+ TNFa+ % Va7.2+ CD161 CD3+            | 0.011601021 | 0.006127336 | 0.496681773  | NA             | NA                   |
| m.i  | M00059: Glycosaminoglycan biosynthesis, heparan su     | 2_CD31- CD45RA+ % -CD25high CD127low CD4+    | 0.029418305 | 0.000188363 | 0.401275691  | NA             | NA                   |
| m.i  | M00059: Glycosaminoglycan biosynthesis, heparan su     | 2_CD39- CD45RA+ % CD25high CD127low CD4+     | 0.036578188 | 0.007775668 | 0.436218242  | NA             | NA                   |
| m.i  | M00059: Glycosaminoglycan biosynthesis, heparan su     | 0_IL-17a- IFNg- % TCRgd+ CD3+                | 0.008628295 | 0.003364658 | -0.489963814 | NA             | NA                   |
| m.i  | M00059: Glycosaminoglycan biosynthesis, heparan su     | 2_CD31- CD45RA+ CD25high CD127low CD4+ (ul)  | 0.037949372 | 0.008680555 | 0.452996138  | NA             | NA                   |
| m.i  | M00059: Glycosaminoglycan biosynthesis, heparan su     | 9_IFNg- TNFa+ % Va7.2+ CD161 CD3+            | 0.036910315 | 0.001697271 | 0.470471878  | NA             | NA                   |
| m.i  | M00059: Glycosaminoglycan biosynthesis, heparan su     | 9_IL-17a- TNFa- % Va7.2+ CD161 CD3+          | 0.000812335 | 0.000613314 | -0.549773709 | NA             | NA                   |
| m.i  | M00059: Glycosaminoglycan biosynthesis, heparan su     | 2_FoxP3- CD45RA+ CD25high CD127low CD4+ (ul) | 0.004518925 | 0.000689935 | 0.502064723  | NA             | NA                   |
| m.i  | M00059: Glycosaminoglycan biosynthesis, heparan su     | 9_IL-17a- TNFa+ % Va7.2+ CD161 CD3+          | 0.002436589 | 0.001260694 | 0.528917462  | NA             | NA                   |
| m.i  | M00059: Glycosaminoglycan biosynthesis, heparan su     | 3_HLA-DR-CD4dim/- %                          | 0.010066613 | 0.011238683 | -0.392958878 | NA             | NA                   |
| m.i  | M00059: Glycosaminoglycan biosynthesis, heparan su     | 9_IFNg- TNFa- % Va7.2+ CD161 CD3+            | 0.019413947 | 0.005595756 | -0.485285395 | NA             | NA                   |
| m.i  | M00059: Glycosaminoglycan biosynthesis, heparan su     | 0_IL-17a- IFNg+ % TCRgd+ CD3+                | 0.003888289 | 0.00211652  | 0.519603028  | NA             | NA                   |
| m.i  | M00013: Malonate semialdehyde pathway, propanoyl-l     | 1_CD4dim CD8bright CD4+ CD8+ % CD3+          | 0.045530952 | 0.031178536 | -0.456192279 | NA             | NA                   |
| m.i  | MF0048: lactose degradation                            | 3_HLA-DR-CD4dim/- (ul)                       | 4.24059E-05 | 0.00208141  | -0.605334308 | NA             | NA                   |
| m.i  | MF0048: lactose degradation                            | 1_CD4- CD8+ CD3+ (ul)                        | 0.020887361 | 0.013171541 | -0.445816588 | NA             | NA                   |
| m.i  | M00115: NAD biosynthesis, aspartate => NAD             | 3_HLA-DR+ CD4dim/- %                         | 0.000476154 | 0.00587291  | -0.521781229 | NA             | ENRICHED-NS-NS       |
| m.i  | M00115: NAD biosynthesis, aspartate => NAD             | 3_HLA-DR+ % CD4dim/-                         | 0.000331188 | 0.009620736 | -0.517940333 | NA             | NA                   |
| m.i  | M00115: NAD biosynthesis, aspartate => NAD             | 1_CD3+ %                                     | 0.034646176 | 0.002527812 | 0.45265956   | NA             | DEPLETED-ENRICHED-NS |
| m.i  | M00115: NAD biosynthesis, aspartate => NAD             | 3_CD14hi CD16- % HLA-DR+ CD16+/HLA-DR- CD16- | 0.007827745 | 0.015387344 | -0.449837863 | NA             | ENRICHED-DEPLETED-NS |
| m.i  | M00115: NAD biosynthesis, aspartate => NAD             | 1_CD19+ %                                    | 0.004485836 | 0.018322012 | -0.478848666 | NA             | DEPLETED-ENRICHED-NS |
| m.i  | M00115: NAD biosynthesis, aspartate => NAD             | 3_CD14hi CD16- HLA-DR+ CD16+/HLA-DR- CD16-%  | 0.008769919 | 0.027730271 | -0.444863621 | NA             | ENRICHED-DEPLETED-NS |
| m.i  | M00115: NAD biosynthesis, aspartate => NAD             | 3_HLA-DR- % CD4dim/-                         | 0.000331188 | 0.009620736 | 0.517940333  | NA             | NA                   |
| m.i  | M00515: FliB-FliC (polar flagellar synthesis) two-comp | 2_CD39+ CD45RA- % CD25high CD127low CD4+     | 0.044107322 | 0.049421638 | -0.410075565 | NA             | NA                   |
| m.i  | MF0021: leucine degradation                            | 5_CD8_Tem/Tcm                                | 0.048024303 | 0.003289668 | -0.455722102 | NA             | NA                   |
| m.i  | MF0061: mannose degradation                            | 0_IL-17a+ IFNg+ TCRgd+ CD4- CD3+ (ul)        | 0.022151348 | 0.024462027 | -0.45628955  | NA             | DEPLETED-NS-NS       |
| m.i  | MF0061: mannose degradation                            | 1_CD4- CD8- %                                | 0.0225871   | 0.041366976 | -0.430632064 | NA             | NA                   |
| m.i  | MF0061: mannose degradation                            | 7_Helios+ IFNg+ CD4+ CD3+ (ul)               | 0.049809928 | 0.00830757  | 0.422020863  | NA             | NA                   |
| m.i  | M00702: Multidrug resistance, efflux pump NorB         | 5_CD8_Tem/Tn                                 | 0.011615508 | 0.018037915 | -0.48130218  | NA             | NA                   |
| m.i  | M00702: Multidrug resistance, efflux pump NorB         | 5_CD8_Teff/Tn                                | 0.000435636 | 0.000271049 | -0.561007691 | NA             | NA                   |
| m.i  | M00702: Multidrug resistance, efflux pump NorB         | 5_CD62L+ CD45RO- % CD8+ CD4-                 | 0.00011265  | 0.000647076 | 0.584051153  | NA             | DEPLETED-NS-NS       |
| m.i  | M00702: Multidrug resistance, efflux pump NorB         | 1_CD4+ CD8- % CD3+                           | 0.01460838  | 0.021874017 | 0.440508273  | NA             | NA                   |
| m.i  | M00702: Multidrug resistance, efflux pump NorB         | 3_CD4high %                                  | 0.0117716   | 0.008101229 | 0.496364236  | NA             | DEPLETED-NS-NS       |
| m.i  | M00500: AtoS-AtoC (cPHB biosynthesis) two-compon       | 0_TCRgd+ % CD3+                              | 0.003119988 | 0.047113774 | 0.502548551  | NA             | NA                   |
| m.i  | M00500: AtoS-AtoC (cPHB biosynthesis) two-compon       | 4_CD56high CD16+ % CD3-                      | 0.025121155 | 0.04855948  | -0.412025876 | NA             | NA                   |
| m.i  | M00500: AtoS-AtoC (cPHB biosynthesis) two-compon       | 0_IL-17a- IFNg- TCRgd+ % CD3+                | 0.00742525  | 0.044096855 | 0.472052981  | NA             | NA                   |
| m.i  | M00500: AtoS-AtoC (cPHB biosynthesis) two-compon       | 4_CD56high CD16+ CD3- %                      | 0.025121155 | 0.04855948  | -0.412025876 | NA             | NA                   |
| m.i  | M00295: BRCA1-associated genome surveillance corr      | 4_CD56high CD16+ CD3- %                      | 0.007912265 | 0.001650535 | 0.460475233  | NA             | NA                   |
| m.i  | M00295: BRCA1-associated genome surveillance corr      | 4_CD56dim CD16+ CD3- %                       | 0.001144683 | 3.70002E-05 | 0.523261019  | NA             | NA                   |
| m.i  | M00295: BRCA1-associated genome surveillance corr      | 4_CD56dim CD16+ CD3- (ul)                    | 0.007912265 | 0.000101667 | 0.465915838  | NA             | NA                   |
| m.i  | M00295: BRCA1-associated genome surveillance corr      | 4_CD56high CD16+ CD3- (ul)                   | 0.009837505 | 0.000659422 | 0.450586892  | NA             | NA                   |
| m.i  | M00295: BRCA1-associated genome surveillance corr      | 4_CD56high CD16+ % CD3-                      | 0.007912265 | 0.001650535 | 0.460475233  | NA             | NA                   |
| m.i  | M00295: BRCA1-associated genome surveillance corr      | 4_CD56dim CD16+ % CD3-                       | 0.001144683 | 3.70002E-05 | 0.523261019  | NA             | NA                   |
| m.i  | M00473: UhpB-UhpA (hexose phosphates uptake) twc       | Monocytes %                                  | 0.028005001 | 0.024004561 | -0.460478118 | NA             | ENRICHED-DEPLETED-NS |
| m.i  | M00473: UhpB-UhpA (hexose phosphates uptake) twc       | 1_CD11c+ CD14+ CD3- CD19- %                  | 0.028268243 | 0.020219307 | -0.460250324 | NA             | ENRICHED-DEPLETED-NS |
| m.i  | M00125: Riboflavin biosynthesis, GTP => riboflavin/FM  | 5_CD24- CD45RO+ % CD25+ CD4+ CD4high CD8-    | 0.033442803 | 0.030764084 | -0.464538879 | NA             | NA                   |
| m.i  | M00605: Glucose/mannose transport system               | 5_CD62L- CD45RO- % CD25+ CD4+ CD4high CD8-   | 0.029535836 | 0.041905647 | 0.413753373  | NA             | NA                   |
| m.i  | M00605: Glucose/mannose transport system               | 5_CD62L- CD45RO- CD25+ CD4+ CD8- CD3+ (ul)   | 0.027175522 | 0.039051754 | 0.41979528   | NA             | DEPLETED-ENRICHED-NS |
| m.i  | M00400: p97-Ufd1-Npl4 complex                          | 9_IL-17a- TNFa- Va7.2+ CD161+ CD4- CD3+ (ul) | 0.040283548 | 0.029415733 | -0.432082865 | NA             | DEPLETED-ENRICHED-NS |
| m.i  | M00400: p97-Ufd1-Npl4 complex                          | 9_IL2- TNFa- Va7.2+ CD161+ CD4- CD3+ (ul)    | 0.046903332 | 0.04051526  | -0.423496744 | NA             | DEPLETED-ENRICHED-NS |
| m.i  | M00198: Putative sn-glycerol-phosphate transport syst  | 0_IL-17a- IFNg+ TCRgd+ %CD3+                 | 0.019068394 | 0.011874088 | 0.477766004  | NA             | NA                   |
| m.i  | M00754: Nisin resistance, phage shock protein homolo   | 3_HLA-DR-CD4dim/- (ul)                       | 0.00461789  | 0.016266275 | -0.508910548 | NA             | NA                   |
| m.i  | M00155: Cytochrome c oxidase, prokaryotes              | 2_FoxP3+ CD45RA- CD25high CD127low % CD4+    | 0.020640561 | 0.000341228 | 0.423678932  | NA             | NA                   |

Table S7

| Test | Feature1                                               | Feature2                                       | CORONA_Q    | CORONA_LRP  | CORONA_R     | Feature1CORONA | Feature2CORONA       |
|------|--------------------------------------------------------|------------------------------------------------|-------------|-------------|--------------|----------------|----------------------|
| m.i  | M00155: Cytochrome c oxidase, prokaryotes              | 6_CD25+ CD4+ (ul)2                             | 0.04466967  | 0.04235747  | 0.424924807  | NA             | DEPLETED-ENRICHED-NS |
| m.i  | M00155: Cytochrome c oxidase, prokaryotes              | 2_CD31- CD45RA+ % -CD25high CD127low CD4+      | 0.020640561 | 0.012659155 | -0.437778979 | NA             | NA                   |
| m.i  | M00155: Cytochrome c oxidase, prokaryotes              | 2_FoxP3+ CD45RA- CD25high CD127low CD4+ (ul)   | 0.020640561 | 0.000724138 | 0.454728869  | NA             | DEPLETED-NS-NS       |
| m.i  | M00155: Cytochrome c oxidase, prokaryotes              | 6_CD25+ CD4+ (ul)                              | 0.04466967  | 0.04235747  | 0.424924807  | NA             | DEPLETED-ENRICHED-NS |
| m.i  | M00481: LiaS-LiaR (cell wall stress response) two-con  | 3_HLA-DR-CD4dim/- (ul)                         | 0.00461789  | 0.016266275 | -0.508910548 | NA             | NA                   |
| m.i  | M00596: Dissimilatory sulfate reduction, sulfate => H2 | 5_CD62L+ CD45RO+ CD8+ CD4- CD3+ (ul)           | 0.000615181 | 0.006902307 | -0.551179232 | NA             | NA                   |
| m.i  | M00596: Dissimilatory sulfate reduction, sulfate => H2 | 0_IL-17a- IFNg- TCRgd+ % CD3+                  | 0.039337924 | 0.049145194 | 0.422898797  | NA             | NA                   |
| m.i  | MF0091: beta-D-glucuronide and D-glucuronate degra     | 0_IL-17a+ IFNg+ TCRgd+ % CD3+                  | 0.02945783  | 0.003698372 | -0.475634836 | NA             | NA                   |
| m.i  | MF0091: beta-D-glucuronide and D-glucuronate degra     | 0_IL-17a+ IFNg+ TCRgd+ CD4- CD3+ (ul)          | 0.005482413 | 0.000855584 | -0.512575709 | NA             | DEPLETED-NS-NS       |
| m.i  | MF0091: beta-D-glucuronide and D-glucuronate degra     | 3_CD14hi CD16- HLA-DR+ CD16+/HLA-DR- CD16-%    | 0.023986263 | 0.029452836 | 0.391724138  | NA             | ENRICHED-DEPLETED-NS |
| m.i  | MF0091: beta-D-glucuronide and D-glucuronate degra     | 1_CD4- CD8- %                                  | 0.028900538 | 0.038758709 | -0.42075839  | NA             | NA                   |
| m.i  | MF0091: beta-D-glucuronide and D-glucuronate degra     | 3_CD14hi CD16- % HLA-DR+ CD16+/HLA-DR- CD16-   | 0.025703861 | 0.025216925 | 0.384303409  | NA             | ENRICHED-DEPLETED-NS |
| m.i  | M00722: Cationic antimicrobial peptide (CAMP) resista  | 0_IL-17a- IL-22+ % TCRgd+ CD3+                 | 0.004708438 | 0.013601965 | 0.508503992  | NA             | NA                   |
| m.i  | M00722: Cationic antimicrobial peptide (CAMP) resista  | 0_IL-17a- IL-22- % TCRgd+ CD3+                 | 0.008965138 | 0.035751729 | -0.485127264 | NA             | NA                   |
| m.i  | M00095: C5 isoprenoid biosynthesis, mevalonate path    | 5_CD62L- CD45RO- % CD25+ CD4+ CD4high CD8-     | 0.019612956 | 0.016316922 | 0.452230516  | NA             | NA                   |
| m.i  | M00095: C5 isoprenoid biosynthesis, mevalonate path    | 5_CD62L- CD45RO- CD25+ CD4+ CD8- CD3+ (ul)     | 0.0223273   | 0.012978655 | 0.440871444  | NA             | DEPLETED-ENRICHED-NS |
| m.i  | M00095: C5 isoprenoid biosynthesis, mevalonate path    | 5_CD62L- CD45RO- CD25+ CD4+ % CD4high CD8-     | 0.021330827 | 0.014573935 | 0.42695447   | NA             | NA                   |
| m.i  | M00664: Nodulation                                     | 7_Helios- IFNg- CD4+ CD3+ (ul)                 | 0.017264784 | 0.000101379 | 0.487918079  | NA             | NS-ENRICHED-NS       |
| m.i  | M00664: Nodulation                                     | 3_CD11c+ CD14- CD16- HLA-DR+ CD4dim/- %        | 0.019505703 | 0.039086594 | -0.452307863 | NA             | ENRICHED-NS-NS       |
| m.i  | M00664: Nodulation                                     | 3_CD14low CD16++ HLA-DR+ CD16+/HLA-DR- CD16-%  | 0.013965911 | 0.001351085 | -0.492622136 | NA             | ENRICHED-DEPLETED-NS |
| m.i  | M00664: Nodulation                                     | 6_CD161+ CCR6+ CXCR3- % CD25+ CD4+             | 0.01696605  | 0.005754321 | 0.463311891  | NA             | NA                   |
| m.i  | M00664: Nodulation                                     | 6_CD27- CXCR3+ CD25- CD4+ (ul)                 | 0.010115037 | 0.024141992 | 0.499648268  | NA             | NA                   |
| m.i  | M00664: Nodulation                                     | 6_CD25- CD4+ (ul)                              | 0.025711195 | 0.00164764  | 0.478892033  | NA             | DEPLETED-ENRICHED-NS |
| m.i  | M00664: Nodulation                                     | 7_Foxp3+ Helios- CD4+ CD3+ (ul)                | 0.039147597 | 0.011491157 | 0.469080319  | NA             | NS-ENRICHED-NS       |
| m.i  | M00664: Nodulation                                     | 4_CD56high CD16+ CD3- (ul)                     | 0.020582311 | 0.002748572 | 0.404140443  | NA             | NA                   |
| m.i  | M00664: Nodulation                                     | 6_CD161+ CCR6+ CXCR3- CD25+ CD4+ (ul)          | 0.022488824 | 0.01521473  | 0.481903491  | NA             | DEPLETED-NS-NS       |
| m.i  | M00664: Nodulation                                     | 4_CD56high CD16+ CD3- %                        | 0.049863802 | 0.003768739 | 0.358344374  | NA             | NA                   |
| m.i  | M00664: Nodulation                                     | 3_CD14low CD16++ % HLA-DR+ CD16+/HLA-DR- CD16- | 0.027386498 | 0.001938195 | -0.477437807 | NA             | ENRICHED-DEPLETED-NS |
| m.i  | M00664: Nodulation                                     | 5_CD62L- CD45RO- CD25- CD4+ CD8- CD3+ (ul)     | 8.69646E-06 | 0.002086722 | 0.623308768  | NA             | NA                   |
| m.i  | M00664: Nodulation                                     | 1_CD4+ CD8- CD3+ (ul)                          | 0.007507384 | 0.000983061 | 0.506006713  | NA             | DEPLETED-ENRICHED-NS |
| m.i  | M00664: Nodulation                                     | 3_HLA-DR+ CD16+/HLA-DR- CD16- (ul)             | 0.006515465 | 0.014583543 | 0.508984943  | NA             | NA                   |
| m.i  | M00664: Nodulation                                     | 8_IL-10+ IL-2- IL-17a- CD4+ CD3+ (ul)          | 0.00082159  | 0.004196345 | 0.549565607  | NA             | DEPLETED-ENRICHED-NS |
| m.i  | M00664: Nodulation                                     | 7_IL-17a- IL-22- CD4+ CD3+ (ul)                | 0.010149402 | 0.00022366  | 0.499575199  | NA             | DEPLETED-ENRICHED-NS |
| m.i  | M00664: Nodulation                                     | 4_CD56high CD16+ % CD3-                        | 0.049863802 | 0.003768739 | 0.358344374  | NA             | NA                   |
| m.i  | M00664: Nodulation                                     | 6_CXCR3- CD25- CD4+ (ul)                       | 0.01681854  | 0.001901228 | 0.488502762  | NA             | DEPLETED-ENRICHED-NS |
| m.i  | M00664: Nodulation                                     | 2_CD31+ CD45RA- % -CD25high CD127low CD4+      | 0.049457854 | 0.041319751 | -0.397659503 | NA             | NA                   |
| m.i  | M00664: Nodulation                                     | 5_CD25- CD4+ CD8- CD3+ (ul)                    | 0.018685663 | 0.001441206 | 0.486145758  | NA             | DEPLETED-ENRICHED-NS |
| m.i  | M00664: Nodulation                                     | 7_Helios- Ki67- CD4+ CD3+ (ul)                 | 0.004179473 | 2.59615E-05 | 0.518138888  | NA             | NS-ENRICHED-NS       |
| m.i  | M00664: Nodulation                                     | 7_IL-17a- Ki67- CD4+ CD3+ (ul)                 | 0.004438466 | 6.529E-05   | 0.516914708  | NA             | NS-ENRICHED-NS       |
| m.i  | M00664: Nodulation                                     | 7_IFNg- IL-17a- CD4+ CD3+ (ul)                 | 0.036743769 | 0.000851509 | 0.470578569  | NA             | DEPLETED-ENRICHED-NS |
| m.i  | M00664: Nodulation                                     | 6_CD161+ CCR6+ % CXCR3- CD25+ CD4+             | 0.030707263 | 0.00357032  | 0.472938275  | NA             | NA                   |
| m.i  | M00664: Nodulation                                     | 8_GM-CSF- IL-2- IL-17a- CD4+ CD3+ (ul)         | 0.036886335 | 0.000891975 | 0.470487213  | NA             | DEPLETED-ENRICHED-NS |
| m.i  | M00691: DNA damage-induced cell cycle checkpoints      | 6_CXCR3+ % CD25+ CD4+                          | 0.044797282 | 0.012626823 | -0.465869696 | NA             | NA                   |
| m.i  | M00691: DNA damage-induced cell cycle checkpoints      | 6_CXCR3- % CD25+ CD4+                          | 0.049316605 | 0.013773875 | 0.463560943  | NA             | NA                   |
| m.i  | M00691: DNA damage-induced cell cycle checkpoints      | 6_CD27dim CXCR3+ CD25- % CD4+                  | 0.020859497 | 0.021179311 | -0.483663094 | NA             | NA                   |
| m.i  | M00691: DNA damage-induced cell cycle checkpoints      | 6_CD27dim CXCR3+ % CD25- CD4+                  | 0.034137798 | 0.025986224 | -0.472309109 | NA             | NA                   |
| m.i  | M00002: Glycolysis, core module involving three-carbc  | 3_HLA-DR-CD4dim/- (ul)                         | 0.004116891 | 0.045760238 | 0.481220314  | NA             | NA                   |
| m.i  | M00002: Glycolysis, core module involving three-carbc  | 3_HLA-DR+ CD4dim/- %                           | 0.001649769 | 0.010567602 | -0.501351895 | NA             | ENRICHED-NS-NS       |
| m.i  | M00002: Glycolysis, core module involving three-carbc  | 3_HLA-DR+ % CD4dim/-                           | 0.000171232 | 0.024071674 | -0.559104819 | NA             | NA                   |
| m.i  | M00002: Glycolysis, core module involving three-carbc  | 3_HLA-DR- % CD4dim/-                           | 0.000171232 | 0.024071674 | 0.559104819  | NA             | NA                   |
| m.i  | M00002: Glycolysis, core module involving three-carbc  | 3_CD14hi CD16- HLA-DR+ CD16+/HLA-DR- CD16-%    | 0.015610561 | 0.020610286 | -0.426161224 | NA             | ENRICHED-DEPLETED-NS |
| m.i  | M00002: Glycolysis, core module involving three-carbc  | 3_CD14hi CD16- % HLA-DR+ CD16+/HLA-DR- CD16-   | 0.015610561 | 0.009882856 | -0.425207352 | NA             | ENRICHED-DEPLETED-NS |
| m.i  | M00049: Adenine ribonucleotide biosynthesis, IMP =>    | 5_CD62L- CD45RO- CD25+ CD4+ % CD4high CD8-     | 0.038027896 | 0.019376384 | 0.379064801  | NA             | NA                   |
| m.i  | M00049: Adenine ribonucleotide biosynthesis, IMP =>    | 5_CD62L- CD45RO- CD25+ CD4+ CD8- CD3+ (ul)     | 0.048451348 | 0.00294497  | 0.37395951   | NA             | DEPLETED-ENRICHED-NS |

Table S7

| Test | Feature1                                               | Feature2                                     | CORONA_Q    | CORONA_LRP  | CORONA_R     | Feature1CORONA | Feature2CORONA       |
|------|--------------------------------------------------------|----------------------------------------------|-------------|-------------|--------------|----------------|----------------------|
| m.i  | M00049: Adenine ribonucleotide biosynthesis, IMP =>    | 5_CD62L- CD45RO- % CD25+ CD4+ CD4high CD8-   | 0.031015664 | 0.013223387 | 0.392411888  | NA             | NA                   |
| m.i  | MF0114: acetyl-CoA to crotonyl-CoA                     | 5_CD62L- CD45RO- CD25+ CD4+ CD8- CD3+ (ul)   | 0.026543503 | 0.021505977 | 0.414125736  | NA             | DEPLETED-ENRICHED-NS |
| m.i  | M00360: Aminoacyl-tRNA biosynthesis, prokaryotes       | 3_HLA-DR+ CD4dim/- %                         | 0.040664882 | 0.043698281 | -0.383919763 | NA             | ENRICHED-NS-NS       |
| m.i  | M00360: Aminoacyl-tRNA biosynthesis, prokaryotes       | 2_FoxP3+ CD39+ CD25high CD127low % CD4+      | 0.021840406 | 0.020928104 | -0.423347135 | NA             | NA                   |
| m.i  | M00360: Aminoacyl-tRNA biosynthesis, prokaryotes       | 3_HLA-DR-CD4dim/- (ul)                       | 0.000627715 | 0.009181771 | 0.556558275  | NA             | NA                   |
| m.i  | M00360: Aminoacyl-tRNA biosynthesis, prokaryotes       | 1_CD4- CD8+ CD3+ (ul)                        | 0.020233874 | 0.028442982 | 0.435732554  | NA             | NA                   |
| m.i  | M00344: Formaldehyde assimilation, xylulose monoph     | 1_CD4+ CD8+ % CD3+                           | 0.049439868 | 0.001204226 | -0.41712036  | NA             | NA                   |
| m.i  | M00344: Formaldehyde assimilation, xylulose monoph     | 3_CD14hi CD16- HLA-DR+ CD16+/HLA-DR- CD16-%  | 0.011955865 | 0.029830026 | -0.432668945 | NA             | ENRICHED-DEPLETED-NS |
| m.i  | M00344: Formaldehyde assimilation, xylulose monoph     | 3_CD14hi CD16- % HLA-DR+ CD16+/HLA-DR- CD16- | 0.012323481 | 0.029774154 | -0.425192967 | NA             | ENRICHED-DEPLETED-NS |
| m.i  | M00344: Formaldehyde assimilation, xylulose monoph     | 0_IL-17a+ IFNg+ TCRgd+ CD4- CD3+ (ul)        | 0.010887796 | 0.002607585 | 0.482688263  | NA             | DEPLETED-NS-NS       |
| m.i  | M00344: Formaldehyde assimilation, xylulose monoph     | 0_IL-17a+ IFNg+ TCRgd+ % CD3+                | 0.02945783  | 0.009190494 | 0.459244777  | NA             | NA                   |
| m.i  | M00704: Tetracycline resistance, efflux pump Tet38     | 4_CD56high CD16+ CD3- (ul)                   | 0.04397491  | 0.022833259 | 0.403266619  | NA             | NA                   |
| m.i  | M00393: TRAMP complex                                  | 3_HLA-DR-CD4dim/- (ul)                       | 0.002945594 | 0.007903345 | 0.503774001  | NA             | NA                   |
| m.i  | M00393: TRAMP complex                                  | 3_HLA-DR+ % CD4dim/-                         | 0.023289886 | 0.009636912 | -0.404525496 | NA             | NA                   |
| m.i  | M00393: TRAMP complex                                  | 3_HLA-DR- % CD4dim/-                         | 0.023289886 | 0.009636912 | 0.404525496  | NA             | NA                   |
| m.i  | M00393: TRAMP complex                                  | 3_HLA-DR-CD4dim/- %                          | 0.003458502 | 0.037124254 | 0.491505349  | NA             | NA                   |
| m.i  | M00364: C10-C20 isoprenoid biosynthesis, bacteria      | 4_CD56dim CD16+ % CD3-                       | 0.010413948 | 0.006372815 | 0.416620995  | NA             | NA                   |
| m.i  | M00364: C10-C20 isoprenoid biosynthesis, bacteria      | 3_HLA-DR+ CD4dim/- %                         | 0.001698016 | 0.044174069 | -0.476232234 | NA             | ENRICHED-NS-NS       |
| m.i  | M00364: C10-C20 isoprenoid biosynthesis, bacteria      | 2_CD31- CD45RA+ % -CD25high CD127low CD4+    | 0.027887314 | 0.013684367 | 0.418834976  | NA             | NA                   |
| m.i  | M00364: C10-C20 isoprenoid biosynthesis, bacteria      | 2_FoxP3+ CD39+ % CD25high CD127low CD4+      | 4.5245E-05  | 0.017131759 | -0.598646172 | NA             | NA                   |
| m.i  | M00364: C10-C20 isoprenoid biosynthesis, bacteria      | 10_CD69+ % Va7.2+ CD161+ CD4- CD8- CD3+      | 0.044337692 | 0.034080612 | 0.44781945   | NA             | NA                   |
| m.i  | M00364: C10-C20 isoprenoid biosynthesis, bacteria      | 2_FoxP3+ CD45RA- % CD25high CD127low CD4+    | 0.000254829 | 0.016662017 | -0.545814951 | NA             | NA                   |
| m.i  | M00364: C10-C20 isoprenoid biosynthesis, bacteria      | 4_CD56dim CD16+ CD3- %                       | 0.010413948 | 0.006372815 | 0.416620995  | NA             | NA                   |
| m.i  | M00364: C10-C20 isoprenoid biosynthesis, bacteria      | 4_CD56high CD16+ CD3- (ul)                   | 0.048433646 | 0.00251077  | 0.354488655  | NA             | NA                   |
| m.i  | M00364: C10-C20 isoprenoid biosynthesis, bacteria      | 4_CD56dim CD16+ CD3- (ul)                    | 0.014082742 | 0.027084959 | 0.417464377  | NA             | NA                   |
| m.i  | MF0107: glycerol degradation (propanediol pathway)     | 1_CD4- CD8+ %                                | 0.044747644 | 0.049149076 | 0.39839411   | NA             | NA                   |
| m.i  | M00549: Nucleotide sugar biosynthesis, glucose => Ul   | 3_HLA-DR+ CD4dim/- %                         | 0.014214802 | 0.030328149 | -0.464814206 | NA             | ENRICHED-NS-NS       |
| m.i  | M00726: Cationic antimicrobial peptide (CAMP) resista  | 5_CD24+ CD45RO- % CD8+ CD4-                  | 0.02011963  | 0.023695526 | -0.442155743 | NA             | NS-ENRICHED-NS       |
| m.i  | M00726: Cationic antimicrobial peptide (CAMP) resista  | 0_IL-17a- IFNg+ % TCRgd+ CD3+                | 0.025130544 | 0.014824559 | -0.43542759  | NA             | NA                   |
| m.i  | MF0087: TCA cycle (Mycobacterium pathway)              | 2_FoxP3- CD45RA+ % CD25high CD127low CD4+    | 0.032260583 | 0.024663715 | 0.437932046  | NA             | NA                   |
| m.i  | M00641: Multidrug resistance, efflux pump MexEF-Opr    | 2_FoxP3+ CD45RA- % CD25high CD127low CD4+    | 0.001296275 | 0.024328274 | 0.525476835  | NA             | NA                   |
| m.i  | MF0009: tryptophan degradation                         | 5_CD8_Tem/Tcm                                | 0.029934875 | 0.000719179 | -0.449573883 | NA             | NA                   |
| m.i  | MF0080: Glycolysis (preparatory phase)                 | 3_CD11c+ CD14- CD16- % HLA-DR+ CD4dim/-      | 0.013639444 | 0.018012673 | 0.485403193  | NA             | NA                   |
| m.i  | M00254: ABC-2 type transport system                    | 3_CD11c+ CD14- CD16- % HLA-DR+ CD4dim/-      | 0.036695461 | 0.039674269 | 0.42876586   | NA             | NA                   |
| m.i  | M00254: ABC-2 type transport system                    | 5_CD62L- CD45RO- CD25+ CD4+ % CD4high CD8-   | 0.036695461 | 0.004246069 | 0.428454471  | NA             | NA                   |
| m.i  | M00184: RNA polymerase, archaea                        | 4_CD56dim CD16 high % CD56+ CD3-             | 0.024570386 | 0.033370965 | 0.428377431  | NA             | NA                   |
| m.i  | M00184: RNA polymerase, archaea                        | 3_HLA-DR+ CD16+/HLA-DR- CD16- %              | 0.000498416 | 0.000624191 | -0.558615107 | NA             | NA                   |
| m.i  | M00184: RNA polymerase, archaea                        | 5_CD24+ CD45RO+ CD8+ CD4- CD3+ (ul)          | 0.039832069 | 0.040619194 | 0.409063064  | NA             | NS-ENRICHED-ENRICHED |
| m.i  | M00184: RNA polymerase, archaea                        | 4_CD56dim CD16high CD56+ CD3- %              | 0.043020086 | 0.017316693 | 0.439997304  | NA             | NA                   |
| m.i  | M00573: Biotin biosynthesis, Biol pathway, long-chain- | 4_CD56high CD16+ CD3- %                      | 0.004249223 | 0.00245979  | -0.469633857 | NA             | NA                   |
| m.i  | M00573: Biotin biosynthesis, Biol pathway, long-chain- | 4_CD56dim CD16+ CD3- %                       | 0.00086755  | 0.02666234  | -0.528755161 | NA             | NA                   |
| m.i  | M00573: Biotin biosynthesis, Biol pathway, long-chain- | 4_CD56high CD16+ CD3- (ul)                   | 0.003046984 | 0.001693052 | -0.490701159 | NA             | NA                   |
| m.i  | M00573: Biotin biosynthesis, Biol pathway, long-chain- | 4_CD56dim CD16+ % CD3-                       | 0.00086755  | 0.02666234  | -0.528755161 | NA             | NA                   |
| m.i  | M00573: Biotin biosynthesis, Biol pathway, long-chain- | 2_FoxP3+ CD45RA- CD25high CD127low % CD4+    | 0.039290295 | 0.005784377 | 0.382084264  | NA             | NA                   |
| m.i  | M00573: Biotin biosynthesis, Biol pathway, long-chain- | 4_CD56high CD16+ % CD3-                      | 0.004249223 | 0.00245979  | -0.469633857 | NA             | NA                   |
| m.i  | M00573: Biotin biosynthesis, Biol pathway, long-chain- | 2_FoxP3+ CD45RA- % CD25high CD127low CD4+    | 0.001090182 | 0.036105315 | 0.505421429  | NA             | NA                   |
| m.i  | M00573: Biotin biosynthesis, Biol pathway, long-chain- | 3_HLA-DR-CD4dim/- (ul)                       | 0.003000981 | 0.013781396 | -0.478735842 | NA             | NA                   |
| m.i  | M00338: Cysteine biosynthesis, homocysteine + serine   | 3_CD14hi CD16- HLA-DR+ CD16+/HLA-DR- CD16-%  | 0.004442856 | 0.037615218 | -0.491335763 | NA             | ENRICHED-DEPLETED-NS |
| m.i  | M00338: Cysteine biosynthesis, homocysteine + serine   | 3_CD14hi CD16- % HLA-DR+ CD16+/HLA-DR- CD16- | 0.002899939 | 0.032308462 | -0.496684144 | NA             | ENRICHED-DEPLETED-NS |
| m.i  | MF0102: mucin degradation                              | 3_HLA-DR-CD4dim/- (ul)                       | 0.011262    | 0.005741109 | -0.456156376 | NA             | NA                   |
| m.i  | MF0102: mucin degradation                              | 1_CD4- CD8+ CD3+ (ul)                        | 0.00574563  | 0.013435834 | -0.510632079 | NA             | NA                   |
| m.i  | M00503: PgtB-PgtA (phosphoglycerate transport) two-    | 1_CD3+ %                                     | 0.031727592 | 0.004755352 | 0.474022339  | NA             | DEPLETED-ENRICHED-NS |
| m.i  | M00120: Coenzyme A biosynthesis, pantothenate => C     | 3_HLA-DR+ % CD4dim/-                         | 0.028384728 | 0.00502672  | -0.450061202 | NA             | NA                   |
| m.i  | M00120: Coenzyme A biosynthesis, pantothenate => C     | 3_HLA-DR-CD4dim/- %                          | 0.028384728 | 0.013632549 | 0.441255458  | NA             | NA                   |

Table S7

| Test | Feature1                                                | Feature2                                     | CORONA_Q    | CORONA_LRP  | CORONA_R     | Feature1CORONA | Feature2CORONA       |
|------|---------------------------------------------------------|----------------------------------------------|-------------|-------------|--------------|----------------|----------------------|
| m.i  | M00120: Coenzyme A biosynthesis, pantothenate => C      | 3_HLA-DR- % CD4dim/-                         | 0.028384728 | 0.00502672  | 0.450061202  | NA             | NA                   |
| m.i  | M00134: Polyamine biosynthesis, arginine => ornithine   | 6_CD161+ CCR6+ CXCR3- % CD25+ CD4+           | 0.01696605  | 0.000789661 | -0.455771385 | NA             | NA                   |
| m.i  | M00134: Polyamine biosynthesis, arginine => ornithine   | 6_CD161+ CCR6+ CXCR3- CD25+ % CD4+           | 0.001143486 | 0.001007499 | -0.536842138 | NA             | NA                   |
| m.i  | M00134: Polyamine biosynthesis, arginine => ornithine   | 2_CD31+ CD45RA+ % -CD25high CD127low CD4+    | 0.044042727 | 0.006437741 | 0.438882816  | NA             | NA                   |
| m.i  | M00209: Osmoprotectant transport system                 | 9_IFNg+ TNFa+ Va7.2+ CD161+ CD4- CD3+ (ul)   | 0.003594314 | 0.000804685 | -0.521189228 | NA             | DEPLETED-NS-NS       |
| m.i  | M00209: Osmoprotectant transport system                 | 9_IL-17a- TNFa+ Va7.2+ CD161+ CD4- CD3+ (ul) | 0.013580759 | 0.008250511 | -0.49323738  | NA             | DEPLETED-NS-NS       |
| m.i  | M00209: Osmoprotectant transport system                 | 9_IFNg+ TNFa+ Va7.2+ CD161 % CD3+            | 0.038869329 | 0.005243059 | -0.469249325 | NA             | DEPLETED-NS-NS       |
| m.i  | M00209: Osmoprotectant transport system                 | 9_IL-17a- IFNg+ Va7.2+ CD161+ CD4- CD3+ (ul) | 0.000974433 | 0.002623204 | -0.546414545 | NA             | DEPLETED-NS-NS       |
| m.i  | M00022: Shikimate pathway, phosphoenolpyruvate + ε      | 5_CD62L- CD45RO- CD25+ CD4+ CD8- CD3+ (ul)   | 0.031664518 | 0.006167407 | 0.395816554  | NA             | DEPLETED-ENRICHED-NS |
| m.i  | M00022: Shikimate pathway, phosphoenolpyruvate + ε      | 3_HLA-DR+ CD4dim/- %                         | 0.003104897 | 0.025349232 | -0.493879937 | NA             | ENRICHED-NS-NS       |
| m.i  | M00022: Shikimate pathway, phosphoenolpyruvate + ε      | 5_CD62L- CD45RO- CD25+ CD4+ % CD4high CD8-   | 0.021330827 | 0.024828396 | 0.414130364  | NA             | NA                   |
| m.i  | M00022: Shikimate pathway, phosphoenolpyruvate + ε      | 5_CD62L- CD45RO- % CD25+ CD4+ CD4high CD8-   | 0.019612956 | 0.022820593 | 0.429178672  | NA             | NA                   |
| m.i  | M00022: Shikimate pathway, phosphoenolpyruvate + ε      | 3_CD14hi CD16- % HLA-DR+ CD16+/HLA-DR- CD16- | 0.007827745 | 0.005209428 | -0.453268297 | NA             | ENRICHED-DEPLETED-NS |
| m.i  | M00022: Shikimate pathway, phosphoenolpyruvate + ε      | 3_CD14hi CD16- HLA-DR+ CD16+/HLA-DR- CD16-%  | 0.008769919 | 0.013403871 | -0.444978306 | NA             | ENRICHED-DEPLETED-NS |
| m.i  | M00166: Reductive pentose phosphate cycle, ribulose     | 3_HLA-DR-CD4dim/- (ul)                       | 0.000914861 | 0.012763051 | 0.549141396  | NA             | NA                   |
| m.i  | M00166: Reductive pentose phosphate cycle, ribulose     | 3_HLA-DR+ % CD4dim/-                         | 0.008861487 | 0.045393446 | -0.463137703 | NA             | NA                   |
| m.i  | M00166: Reductive pentose phosphate cycle, ribulose     | 3_HLA-DR- % CD4dim/-                         | 0.008861487 | 0.045393446 | 0.463137703  | NA             | NA                   |
| m.i  | M00260: DNA polymerase III complex, bacteria            | 3_HLA-DR+ % CD4dim/-                         | 0.004377631 | 0.046080869 | -0.479725965 | NA             | NA                   |
| m.i  | M00260: DNA polymerase III complex, bacteria            | 2_FoxP3+ CD39+ CD25high CD127low % CD4+      | 0.007787143 | 0.032376219 | -0.456400003 | NA             | NA                   |
| m.i  | M00260: DNA polymerase III complex, bacteria            | 3_HLA-DR+ CD4dim/-                           | 0.017263538 | 0.047487696 | -0.425335234 | NA             | ENRICHED-NS-NS       |
| m.i  | M00260: DNA polymerase III complex, bacteria            | 3_HLA-DR-CD4dim/- (ul)                       | 0.004377631 | 0.002192447 | 0.492035075  | NA             | NA                   |
| m.i  | M00260: DNA polymerase III complex, bacteria            | 3_HLA-DR- % CD4dim/-                         | 0.004377631 | 0.046080869 | 0.479725965  | NA             | NA                   |
| m.i  | M00150: Fumarate reductase, prokaryotes                 | 5_CD62L- CD45RO- % CD25+ CD4+ CD4high CD8-   | 0.043957045 | 0.010445522 | 0.398919609  | NA             | NA                   |
| m.i  | M00498: NtrY-NtrX (nitrogen regulation) two-compone     | 3_HLA-DR-CD4dim/- (ul)                       | 0.015857017 | 0.032171674 | -0.48199198  | NA             | NA                   |
| m.i  | M00695: cAMP signaling                                  | 6_CD161+ CCR6+ % CXCR3- CD25+ CD4+           | 0.030707263 | 0.000449368 | 0.458228275  | NA             | NA                   |
| m.i  | M00695: cAMP signaling                                  | 6_CD161+ CCR6+ CXCR3- % CD25+ CD4+           | 0.021686769 | 0.000308352 | 0.460133583  | NA             | NA                   |
| m.i  | M00158: F-type ATPase, eukaryotes                       | 8_GM-CSF+ IL-2+ IL-17a- CD4+ CD3+ (ul)       | 0.035371486 | 0.039882123 | 0.446009841  | NA             | NS-ENRICHED-NS       |
| m.i  | MF0115: Crotonyl-coA from succinate                     | 5_CD8_Tem/Tcm                                | 0.041456474 | 0.00028293  | -0.463975155 | NA             | NA                   |
| m.i  | M00391: Exosome, eukaryotes                             | 3_HLA-DR+ CD16+/HLA-DR- CD16- %              | 0.039657219 | 0.004933588 | -0.431638248 | NA             | NA                   |
| m.i  | M00516: SLN1-YPD1-SSK1/SKN7 (osmosensing) two           | 2_FoxP3- CD45RA+ % CD25high CD127low CD4+    | 0.029010936 | 0.013913867 | -0.431628626 | NA             | NA                   |
| m.i  | M00516: SLN1-YPD1-SSK1/SKN7 (osmosensing) two           | 1_CD4+ CD8+ % CD3+                           | 0.009087259 | 0.046342729 | 0.494811459  | NA             | NA                   |
| m.i  | M00036: Leucine degradation, leucine => acetoacetate    | 5_CD8_Tem/Tcm                                | 0.047806557 | 0.002883864 | -0.460358056 | NA             | NA                   |
| m.i  | MF0112: acetate to acetyl-CoA                           | 8_GM-CSF- IL-2+ IL-17a- CD4+ CD3+ (ul)       | 0.039965639 | 0.043083277 | 0.439097909  | NA             | DEPLETED-NS-NS       |
| m.i  | M00475: BarA-UvrY (central carbon metabolism) two-c     | 4_CD56high CD16+ % CD3-                      | 0.00398381  | 0.002892087 | -0.477019637 | NA             | NA                   |
| m.i  | M00475: BarA-UvrY (central carbon metabolism) two-c     | 4_CD56dim CD16+ % CD3-                       | 0.000681725 | 0.02484948  | -0.525508107 | NA             | NA                   |
| m.i  | M00475: BarA-UvrY (central carbon metabolism) two-c     | 4_CD56high CD16+ CD3- (ul)                   | 0.003811886 | 0.001969469 | -0.481571135 | NA             | NA                   |
| m.i  | M00475: BarA-UvrY (central carbon metabolism) two-c     | 4_CD56dim CD16+ CD3- %                       | 0.000681725 | 0.02484948  | -0.525508107 | NA             | NA                   |
| m.i  | M00475: BarA-UvrY (central carbon metabolism) two-c     | 4_CD56high CD16+ CD3- %                      | 0.00398381  | 0.002892087 | -0.477019637 | NA             | NA                   |
| m.i  | MF0014: glutamate degradation (4-aminobutanoate pa      | 3_HLA-DR-CD4dim/- (ul)                       | 0.017594513 | 0.017407947 | -0.44041323  | NA             | NA                   |
| m.i  | MF0014: glutamate degradation (4-aminobutanoate pa      | 2_FoxP3+ CD45RA- CD25high CD127low % CD4+    | 0.024512792 | 0.002923447 | 0.422629653  | NA             | NA                   |
| m.i  | MF0014: glutamate degradation (4-aminobutanoate pa      | 1_CD4- CD8+ CD3+ (ul)                        | 0.006872906 | 0.022064927 | -0.500479544 | NA             | NA                   |
| m.i  | MF0104: nitrate reduction (dissimilatory)               | 5_CD62L- CD45RO+ CD8+ CD4- CD3+ (ul)         | 0.00457895  | 0.006937542 | -0.473519794 | NA             | DEPLETED-ENRICHED-NS |
| m.i  | MF0104: nitrate reduction (dissimilatory)               | 3_HLA-DR-CD4dim/- (ul)                       | 0.00136782  | 0.002304681 | -0.511372148 | NA             | NA                   |
| m.i  | MF0104: nitrate reduction (dissimilatory)               | 5_CD24- CD45RO+ CD8+ CD4- CD3+ (ul)          | 0.025484413 | 0.030275428 | -0.425035167 | NA             | DEPLETED-NS-NS       |
| m.i  | MF0104: nitrate reduction (dissimilatory)               | 1_CD4- CD8+ CD3+ (ul)                        | 0.000196196 | 0.003883142 | -0.562852811 | NA             | NA                   |
| m.i  | M00023: Tryptophan biosynthesis, chorismate => trypt    | 0_IL-17a- IFNg- TCRgd+ % CD3+                | 0.006198722 | 0.041342379 | 0.502690112  | NA             | NA                   |
| m.i  | M00579: Phosphate acetyltransferase-acetate kinase      | 3_HLA-DR-CD4dim/- (ul)                       | 0.000683672 | 0.010758951 | 0.547570332  | NA             | NA                   |
| m.i  | M00579: Phosphate acetyltransferase-acetate kinase      | 2_FoxP3+ CD39+ CD25high CD127low % CD4+      | 0.045545322 | 0.012183022 | -0.389197985 | NA             | NA                   |
| m.i  | M00579: Phosphate acetyltransferase-acetate kinase      | 1_CD4- CD8+ CD3+ (ul)                        | 0.018299714 | 0.036938323 | 0.43847278   | NA             | NA                   |
| m.i  | M00530: Dissimilatory nitrate reduction, nitrate => amn | 5_CD24- CD45RO+ CD8+ CD4- CD3+ (ul)          | 0.010679289 | 0.028543016 | -0.465568739 | NA             | DEPLETED-NS-NS       |
| m.i  | M00530: Dissimilatory nitrate reduction, nitrate => amn | 1_CD4- CD8+ CD3+ (ul)                        | 0.002557533 | 0.032496216 | -0.514820194 | NA             | NA                   |
| m.i  | M00530: Dissimilatory nitrate reduction, nitrate => amn | 3_HLA-DR-CD4dim/- (ul)                       | 0.046364423 | 0.008462886 | -0.414289498 | NA             | NA                   |
| m.i  | M00530: Dissimilatory nitrate reduction, nitrate => amn | 5_CD62L- CD45RO+ CD8+ CD4- CD3+ (ul)         | 0.002557533 | 0.013097864 | -0.506763854 | NA             | DEPLETED-ENRICHED-NS |
| m.i  | M00194: Maltose/maltodextrin transport system           | 5_CD62L- CD45RO- % CD25+ CD4+ CD4high CD8-   | 0.028588101 | 0.032677403 | 0.410707114  | NA             | NA                   |

Table S7

| Test | Feature1                                                | Feature2                                      | CORONA_Q    | CORONA_LRP  | CORONA_R     | Feature1CORONA | Feature2CORONA       |
|------|---------------------------------------------------------|-----------------------------------------------|-------------|-------------|--------------|----------------|----------------------|
| m.i  | M00194: Maltose/maltodextrin transport system           | 5_CD62L- CD45RO- CD25+ CD4+ CD8- CD3+ (ul)    | 0.0223273   | 0.016055629 | 0.427935061  | NA             | DEPLETED-ENRICHED-NS |
| m.i  | M00194: Maltose/maltodextrin transport system           | 5_CD62L- CD45RO- CD25+ CD4+ % CD4high CD8-    | 0.022010389 | 0.038384238 | 0.421921457  | NA             | NA                   |
| m.i  | M00466: NbIS-NbIR (photosynthesis) two-component r2     | FoxP3+ CD45RA- CD25high CD127low CD4+ (ul)    | 0.01769636  | 0.029809746 | 0.460997086  | NA             | DEPLETED-NS-NS       |
| m.i  | M00466: NbIS-NbIR (photosynthesis) two-component r2     | FoxP3+ CD45RA- CD25high CD127low % CD4+       | 0.006802803 | 0.002648002 | 0.467597335  | NA             | NA                   |
| m.i  | M00466: NbIS-NbIR (photosynthesis) two-component r2     | FoxP3+ CD31- CD25high CD127low % CD4+         | 0.002112751 | 0.004438719 | 0.517916226  | NA             | NA                   |
| m.i  | M00466: NbIS-NbIR (photosynthesis) two-component r5     | CD4+ CD8+ %                                   | 0.000133444 | 0.002218159 | -0.581260004 | NA             | NA                   |
| m.i  | M00466: NbIS-NbIR (photosynthesis) two-component r1     | CD4+ CD8+ %                                   | 0.023990588 | 0.019793778 | -0.478269869 | NA             | NA                   |
| m.i  | M00466: NbIS-NbIR (photosynthesis) two-component r1     | CD4+ CD8+ % CD3+                              | 0.049439868 | 0.030106779 | -0.42398079  | NA             | NA                   |
| m.i  | M00466: NbIS-NbIR (photosynthesis) two-component r2     | CD25high CD127low % CD4+                      | 0.008785318 | 0.005835415 | 0.487525407  | NA             | NA                   |
| m.i  | MF0054: arabinose degradation                           | 3_CD14- CD16- HLA-DR+ CD4dim/- %              | 0.006256011 | 0.045665578 | 0.509833835  | NA             | NA                   |
| m.i  | MF0054: arabinose degradation                           | 5_CD24+ CD45RO+ CD25- CD4+ CD8- CD3+ (ul)     | 0.028091635 | 0.005117597 | -0.42572937  | NA             | NA                   |
| m.i  | MF0054: arabinose degradation                           | 1_CD19+ %                                     | 0.001702313 | 0.034651794 | 0.535881322  | NA             | DEPLETED-ENRICHED-NS |
| m.i  | MF0054: arabinose degradation                           | 5_CD24+ CD45RO+ % CD25- CD4+ CD4high CD8-     | 0.048545387 | 0.008039047 | -0.4176282   | NA             | NA                   |
| m.i  | MF0054: arabinose degradation                           | 5_CD24+ CD45RO+ CD8+ CD4- CD3+ (ul)           | 0.017651816 | 0.044736851 | -0.417581615 | NA             | NS-ENRICHED-ENRICHED |
| m.i  | MF0054: arabinose degradation                           | 5_CD24+ CD45RO+ CD25- CD4+ % CD4high CD8-     | 0.048562757 | 0.009738922 | -0.417618258 | NA             | NA                   |
| m.i  | M00483: NreB-NreC (dissimilatory nitrate/nitrite reduct | 8_GM-CSF- IL-2- IL-17a+ CD4+ CD3+ (ul)        | 0.049972098 | 0.033053423 | 0.440143225  | NA             | DEPLETED-ENRICHED-NS |
| m.i  | M00483: NreB-NreC (dissimilatory nitrate/nitrite reduct | 8_TNFa- IL-5+ IL-17a+ % CD3+                  | 0.008392223 | 0.029819062 | 0.503645309  | NA             | NA                   |
| m.i  | M00483: NreB-NreC (dissimilatory nitrate/nitrite reduct | 1_CD11c+ CD14+ CD3- CD19- %                   | 0.005862405 | 0.015230674 | -0.511186637 | NA             | ENRICHED-DEPLETED-NS |
| m.i  | M00483: NreB-NreC (dissimilatory nitrate/nitrite reduct | 8_GM-CSF- IL-2- IL-17a+ % CD3+                | 0.011715131 | 0.019826035 | 0.496468878  | NA             | NA                   |
| m.i  | M00483: NreB-NreC (dissimilatory nitrate/nitrite reduct | 5_CD62L+ CD45RO- % CD25+ CD4+ CD4high CD8-    | 0.020513789 | 0.01966338  | -0.42448947  | NA             | NA                   |
| m.i  | M00483: NreB-NreC (dissimilatory nitrate/nitrite reduct | Monocytes %                                   | 0.007018115 | 0.017730526 | -0.507426557 | NA             | ENRICHED-DEPLETED-NS |
| m.i  | M00483: NreB-NreC (dissimilatory nitrate/nitrite reduct | 8_TNFa- IL-5+ IL-17a+ CD4+ CD3+ (ul)          | 0.021076207 | 0.014838168 | 0.483428949  | NA             | DEPLETED-ENRICHED-NS |
| m.i  | M00552: D-galactonate degradation, De Ley-Doudorof      | 3_HLA-DR-CD4dim/- (ul)                        | 0.001850523 | 0.025070046 | 0.534855681  | NA             | NA                   |
| m.i  | M00355: Spliceosome, 35S U5-snRNP                       | 5_CD4_Tcm/Treg                                | 0.043250641 | 0.025874958 | 0.422491125  | NA             | ENRICHED-NS-ENRICHED |
| m.i  | M00355: Spliceosome, 35S U5-snRNP                       | 6_CD27- CXCR3+ CD25- % CD4+                   | 0.049189313 | 0.036291971 | 0.428350889  | NA             | NA                   |
| m.i  | M00180: RNA polymerase II, eukaryotes                   | 5_CD4_Teff/2_Treg                             | 0.027851029 | 0.027708884 | 0.459893736  | NA             | NA                   |
| m.i  | M00531: Assimilatory nitrate reduction, nitrate => amm  | 6_CD27- CXCR3+ CD25- CD4+ (ul)                | 0.047797621 | 0.036815293 | -0.4347699   | NA             | NA                   |
| m.i  | M00531: Assimilatory nitrate reduction, nitrate => amm  | 6_CD27- CXCR3+ % CD25- CD4+                   | 0.006164842 | 0.006388967 | -0.510139951 | NA             | NA                   |
| m.i  | M00531: Assimilatory nitrate reduction, nitrate => amm  | 6_CD27- CXCR3+ CD25- % CD4+                   | 0.005432143 | 0.006458718 | -0.512766172 | NA             | NA                   |
| m.i  | M00531: Assimilatory nitrate reduction, nitrate => amm  | 6_CD27- % CXCR3+ CD25- CD4+                   | 0.000629109 | 0.005904655 | -0.554431931 | NA             | NA                   |
| m.i  | M00531: Assimilatory nitrate reduction, nitrate => amm  | 6_CD27bright % CXCR3+ CD25- CD4+              | 0.000128521 | 0.000219308 | 0.58188163   | NA             | NA                   |
| m.i  | MF0076: arabinol degradation                            | 5_CD24+ CD45RO+ CD25- CD4+ % CD4high CD8-     | 0.018646871 | 0.012807239 | -0.463756203 | NA             | NA                   |
| m.i  | MF0076: arabinol degradation                            | 5_CD24+ CD45RO- % CD25+ CD4+ CD4high CD8-     | 0.046761988 | 0.023283877 | -0.421855254 | NA             | NA                   |
| m.i  | MF0076: arabinol degradation                            | 5_CD24+ CD45RO+ % CD25- CD4+ CD4high CD8-     | 0.021633291 | 0.009895088 | -0.466700778 | NA             | NA                   |
| m.i  | MF0076: arabinol degradation                            | 5_CD24+ CD45RO+ CD25- CD4+ CD8- CD3+ (ul)     | 0.004386802 | 0.003320499 | -0.505996584 | NA             | NA                   |
| m.i  | M00394: RNA degradosome                                 | 3_HLA-DR+ CD4dim/- %                          | 0.017622421 | 0.049238605 | -0.439201286 | NA             | ENRICHED-NS-NS       |
| m.i  | M00335: Sec (secretion) system                          | 3_HLA-DR+ CD4dim/- %                          | 0.046327982 | 0.012929249 | -0.36831817  | NA             | ENRICHED-NS-NS       |
| m.i  | M00335: Sec (secretion) system                          | 2_FoxP3+ CD39+ CD25high CD127low % CD4+       | 0.005800986 | 0.010429327 | -0.491718519 | NA             | NA                   |
| m.i  | M00335: Sec (secretion) system                          | 3_HLA-DR+ % CD4dim/-                          | 0.01599018  | 0.004863836 | -0.417337292 | NA             | NA                   |
| m.i  | M00335: Sec (secretion) system                          | 3_HLA-DR-CD4dim/- (ul)                        | 0.005800986 | 0.005063544 | 0.494738765  | NA             | NA                   |
| m.i  | M00335: Sec (secretion) system                          | 3_CD14- CD16- HLA-DR+ CD4dim/- %              | 0.011765008 | 0.044930416 | -0.434635658 | NA             | NA                   |
| m.i  | M00335: Sec (secretion) system                          | 3_HLA-DR- % CD4dim/-                          | 0.01599018  | 0.004863836 | 0.417337292  | NA             | NA                   |
| m.i  | MF0011: aspartate degradation (oxaloacetate pathway     | 7_IFNg+ IL-17a- CD4+ CD3+ (ul)                | 0.025129663 | 0.000240115 | 0.474022653  | NA             | NA                   |
| m.i  | MF0011: aspartate degradation (oxaloacetate pathway     | 7_Helios- IFNg+ CD4+ CD3+ (ul)                | 0.03558221  | 0.000416672 | 0.459079284  | NA             | NA                   |
| m.i  | M00016: Lysine biosynthesis, succinyl-DAP pathway, z    | 5_CD62L- CD45RO- CD25+ CD4+ % CD4high CD8-    | 0.021330827 | 0.00432466  | 0.457231402  | NA             | NA                   |
| m.i  | M00016: Lysine biosynthesis, succinyl-DAP pathway, z    | 4_CD56high CD16- CD3- %                       | 0.038373632 | 0.015738754 | 0.416164274  | NA             | NA                   |
| m.i  | M00016: Lysine biosynthesis, succinyl-DAP pathway, z    | 5_CD62L- CD45RO- CD25+ CD4+ CD8- CD3+ (ul)    | 0.028316657 | 0.004828298 | 0.404548343  | NA             | DEPLETED-ENRICHED-NS |
| m.i  | M00016: Lysine biosynthesis, succinyl-DAP pathway, z    | 4_CD56high CD16- % CD3-                       | 0.038373632 | 0.015738754 | 0.416164274  | NA             | NA                   |
| m.i  | M00016: Lysine biosynthesis, succinyl-DAP pathway, z    | 3_CD14hi CD16- % HLA-DR+ CD16+ /HLA-DR- CD16- | 0.017323469 | 0.023536532 | -0.428422668 | NA             | ENRICHED-DEPLETED-NS |
| m.i  | M00016: Lysine biosynthesis, succinyl-DAP pathway, z    | 5_CD62L- CD45RO- % CD25+ CD4+ CD4high CD8-    | 0.019612956 | 0.003367921 | 0.450007055  | NA             | NA                   |
| m.i  | M00787: Bacilysin biosynthesis, prephenate => bacily    | 4_CD8- CD4+ CD56+ CD3+ %                      | 0.010430314 | 0.000423546 | 0.483661867  | NA             | NA                   |
| m.i  | M00716: ArIS-ArIR (virulence regulation) two-compone    | 6_CD161+ CCR6- CXCR3- CD25- CD4+ (ul)         | 0.000262634 | 0.000994466 | 0.569836587  | NA             | NA                   |
| m.i  | M00716: ArIS-ArIR (virulence regulation) two-compone    | 5_CD24+ CD45RO- % CD25- CD4+ CD4high CD8-     | 0.023280823 | 0.048354556 | 0.464943754  | NA             | NA                   |
| m.i  | M00716: ArIS-ArIR (virulence regulation) two-compone    | 3_HLA-DR-CD4dim/- (ul)                        | 0.009886686 | 0.021551982 | 0.405436759  | NA             | NA                   |

Table S7

| Test | Feature1                                              | Feature2                                     | CORONA_Q    | CORONA_LRP  | CORONA_R     | Feature1CORONA | Feature2CORONA       |
|------|-------------------------------------------------------|----------------------------------------------|-------------|-------------|--------------|----------------|----------------------|
| m.i  | M00716: ArlS-ArlR (virulence regulation) two-compone  | 5_CD24+ CD45RO- CD25- CD4+ % CD4high CD8-    | 0.027156939 | 0.04964368  | 0.461225687  | NA             | NA                   |
| m.i  | M00606: N,N'-Diacetylchitobiose transport system      | 5_CD62L- CD45RO- CD25+ CD4+ CD8- CD3+ (ul)   | 0.0223273   | 0.017234206 | 0.42956587   | NA             | DEPLETED-ENRICHED-NS |
| m.i  | M00606: N,N'-Diacetylchitobiose transport system      | 5_CD62L- CD45RO- CD25+ CD4+ % CD4high CD8-   | 0.021330827 | 0.031769919 | 0.425796017  | NA             | NA                   |
| m.i  | M00606: N,N'-Diacetylchitobiose transport system      | 5_CD62L- CD45RO- % CD25+ CD4+ CD4high CD8-   | 0.02203541  | 0.022395568 | 0.418643445  | NA             | NA                   |
| m.i  | M00365: C10-C20 isoprenoid biosynthesis, archaea      | 5_CD62L+ CD45RO- CD8+ CD4- CD3+ (ul)         | 0.007571747 | 0.007533711 | 0.45709066   | NA             | DEPLETED-NS-NS       |
| m.i  | M00365: C10-C20 isoprenoid biosynthesis, archaea      | 3_CD14hi CD16- % HLA-DR+ CD16+/HLA-DR- CD16- | 0.002899939 | 0.01216944  | -0.513122197 | NA             | ENRICHED-DEPLETED-NS |
| m.i  | M00365: C10-C20 isoprenoid biosynthesis, archaea      | 5_CD8_Teff/Tn                                | 0.030255741 | 0.00904481  | -0.416569994 | NA             | NA                   |
| m.i  | M00365: C10-C20 isoprenoid biosynthesis, archaea      | 3_CD14hi CD16- HLA-DR+ CD16+/HLA-DR- CD16-%  | 0.004442856 | 0.012109844 | -0.513848543 | NA             | ENRICHED-DEPLETED-NS |
| m.i  | M00465: ManS-ManR (manganese homeostasis) two-        | 2_CD31+ CD45RA- CD25high CD127low % CD4+     | 0.019303859 | 0.03676731  | 0.485413503  | NA             | NA                   |
| m.i  | M00465: ManS-ManR (manganese homeostasis) two-        | 6_CD161+ CCR6- % CXCR3- CD25- CD4+           | 0.018096036 | 0.044881025 | -0.435341088 | NA             | NA                   |
| m.i  | MF0002: ethanol production (CO2 pathway)              | 3_CD14hi CD16- % HLA-DR+ CD16+/HLA-DR- CD16- | 0.026859036 | 0.032940386 | -0.399972597 | NA             | ENRICHED-DEPLETED-NS |
| m.i  | MF0002: ethanol production (CO2 pathway)              | 3_CD14hi CD16- HLA-DR+ CD16+/HLA-DR- CD16-%  | 0.026859036 | 0.038569468 | -0.395399821 | NA             | ENRICHED-DEPLETED-NS |
| m.i  | M00185: Sulfate transport system                      | 5_CD62L+ CD45RO+ CD25- CD4+ % CD4high CD8-   | 0.034718632 | 0.000295544 | -0.442201416 | NA             | NA                   |
| m.i  | M00185: Sulfate transport system                      | 5_CD62+ CD45RO+ % CD25- CD4+ CD4high CD8-    | 0.034718632 | 0.000474163 | -0.436009868 | NA             | NA                   |
| m.i  | M00544: Carbazole degradation, carbazole => 2-oxopr   | 1_CD19+ %                                    | 0.007542291 | 0.007141975 | 0.42381819   | NA             | DEPLETED-ENRICHED-NS |
| m.i  | M00544: Carbazole degradation, carbazole => 2-oxopr   | 5_CD62L- CD45RO+ CD25+ CD4+ CD8- CD3+ (ul)   | 0.045503567 | 0.011895528 | 0.448442076  | NA             | DEPLETED-NS-NS       |
| m.i  | M00544: Carbazole degradation, carbazole => 2-oxopr   | 5_CD24- CD45RO+ CD25+ CD4+ % CD4high CD8-    | 0.002058582 | 0.020485921 | 0.532210476  | NA             | NA                   |
| m.i  | M00544: Carbazole degradation, carbazole => 2-oxopr   | 5_CD25+ CD4+% CD4high                        | 0.000976547 | 0.002819852 | 0.546374311  | NA             | DEPLETED-NS-NS       |
| m.i  | M00544: Carbazole degradation, carbazole => 2-oxopr   | 5_CD25- CD4+ % CD4high cells                 | 0.00078163  | 0.000723648 | -0.550480436 | NA             | ENRICHED-NS-NS       |
| m.i  | M00544: Carbazole degradation, carbazole => 2-oxopr   | 2_FoxP3+ CD45RA- % CD25high CD127low CD4+    | 0.000254829 | 0.00696232  | 0.551036386  | NA             | NA                   |
| m.i  | M00698: Multidrug resistance, efflux pump BpeEF-Opr   | 1_CD4- CD8+ CD3+ (ul)                        | 0.002135593 | 0.021352971 | -0.50189989  | NA             | NA                   |
| m.i  | M00698: Multidrug resistance, efflux pump BpeEF-Opr   | 3_HLA-DR-CD4dim/- (ul)                       | 0.002135593 | 0.011579415 | -0.530252101 | NA             | NA                   |
| m.i  | M00698: Multidrug resistance, efflux pump BpeEF-Opr   | 5_CD62L- CD45RO+ CD8+ CD4- CD3+ (ul)         | 0.004566447 | 0.048184208 | -0.467153818 | NA             | DEPLETED-ENRICHED-NS |
| m.i  | M00171: C4-dicarboxylic acid cycle, NAD - malic enzyr | 4_CD56dim CD16+ % CD3-                       | 0.038997292 | 0.042876151 | 0.399342316  | NA             | NA                   |
| m.i  | M00171: C4-dicarboxylic acid cycle, NAD - malic enzyr | 3_HLA-DR+ % CD4dim/- %                       | 0.001106257 | 0.020585359 | -0.515748032 | NA             | NA                   |
| m.i  | M00171: C4-dicarboxylic acid cycle, NAD - malic enzyr | 3_HLA-DR+ CD4dim/- %                         | 0.00849704  | 0.01212803  | -0.456104134 | NA             | ENRICHED-NS-NS       |
| m.i  | M00171: C4-dicarboxylic acid cycle, NAD - malic enzyr | 3_HLA-DR-CD4dim/- (ul)                       | 0.000609133 | 0.009571541 | 0.548671435  | NA             | NA                   |
| m.i  | M00171: C4-dicarboxylic acid cycle, NAD - malic enzyr | 4_CD56dim CD16+ CD3- %                       | 0.038997292 | 0.042876151 | 0.399342316  | NA             | NA                   |
| m.i  | M00171: C4-dicarboxylic acid cycle, NAD - malic enzyr | 3_HLA-DR- % CD4dim/-                         | 0.001106257 | 0.020585359 | 0.515748032  | NA             | NA                   |
| m.i  | M00341: Proteasome, 19S regulatory particle (PA700)   | 4_CD56high CD16+ CD3- %                      | 0.002800478 | 0.014879458 | 0.504846479  | NA             | NA                   |
| m.i  | M00341: Proteasome, 19S regulatory particle (PA700)   | 4_CD56high CD16+ % CD3-                      | 0.002800478 | 0.014879458 | 0.504846479  | NA             | NA                   |
| m.i  | M00490: MalK-MalR (malate transport) two-componen     | 5_CD24- CD45RO+ % CD25- CD4+ CD4high CD8-    | 0.000861864 | 0.003976713 | -0.548685017 | NA             | NA                   |
| m.i  | M00490: MalK-MalR (malate transport) two-componen     | 5_CD24- CD45RO+ % CD25+ CD4+ CD4high CD8-    | 0.035948215 | 0.022457674 | -0.421668038 | NA             | NA                   |
| m.i  | M00490: MalK-MalR (malate transport) two-componen     | 5_CD24- CD45RO+ CD25- CD4+ % CD4high CD8-    | 0.000421418 | 0.000804987 | -0.561594534 | NA             | NS-DEPLETED-DEPLETED |
| m.i  | M00359: Aminoacyl-tRNA biosynthesis, eukaryotes       | 1_CD4- CD8+ CD3+ (ul)                        | 0.028292777 | 0.034031907 | 0.425137011  | NA             | NA                   |
| m.i  | M00359: Aminoacyl-tRNA biosynthesis, eukaryotes       | 3_HLA-DR-CD4dim/- (ul)                       | 0.000853066 | 0.011072722 | 0.550529777  | NA             | NA                   |
| m.i  | M00359: Aminoacyl-tRNA biosynthesis, eukaryotes       | 3_HLA-DR+ CD4dim/- %                         | 0.04434134  | 0.043681321 | -0.384339947 | NA             | ENRICHED-NS-NS       |
| m.i  | M00359: Aminoacyl-tRNA biosynthesis, eukaryotes       | 2_FoxP3+ CD39+ CD25high CD127low % CD4+      | 0.028292777 | 0.02424643  | -0.414960586 | NA             | NA                   |
| m.i  | M00642: Multidrug resistance, efflux pump MexJK-Opr   | 2_FoxP3+ CD39+ CD25high CD127low % CD4+      | 0.017581235 | 0.044568041 | 0.455577793  | NA             | NA                   |
| m.i  | M00642: Multidrug resistance, efflux pump MexJK-Opr   | 2_FoxP3+ CD45RA- CD25high CD127low % CD4+    | 0.027698451 | 0.034686433 | 0.418076518  | NA             | NA                   |
| m.i  | M00642: Multidrug resistance, efflux pump MexJK-Opr   | 3_HLA-DR-CD4dim/- (ul)                       | 0.045665158 | 0.047485465 | -0.386956522 | NA             | NA                   |
| m.i  | M00048: Inosine monophosphate biosynthesis, PRPP      | 3_HLA-DR-CD4dim/- (ul)                       | 0.002801323 | 0.008350779 | 0.495542565  | NA             | NA                   |
| m.i  | M00200: Putative sorbitol/mannitol transport system   | 5_CD62L- CD45RO- % CD25+ CD4+ CD4high CD8-   | 0.023337058 | 0.024664146 | 0.417049443  | NA             | NA                   |
| m.i  | M00200: Putative sorbitol/mannitol transport system   | 5_CD62L- CD45RO- CD25+ CD4+ % CD4high CD8-   | 0.021330827 | 0.031684688 | 0.426858631  | NA             | NA                   |
| m.i  | M00200: Putative sorbitol/mannitol transport system   | 5_CD62L- CD45RO- CD25+ CD4+ CD8- CD3+ (ul)   | 0.0223273   | 0.016849821 | 0.43054543   | NA             | DEPLETED-ENRICHED-NS |
| m.i  | M00577: Biotin biosynthesis, BioW pathway, pimelate   | : 4_CD56dim CD16+ CD3- %                     | 0.000589828 | 0.021667299 | -0.536245387 | NA             | NA                   |
| m.i  | M00577: Biotin biosynthesis, BioW pathway, pimelate   | : 4_CD56high CD16+ CD3- (ul)                 | 0.003046984 | 0.001231683 | -0.501662465 | NA             | NA                   |
| m.i  | M00577: Biotin biosynthesis, BioW pathway, pimelate   | : 4_CD56high CD16+ CD3- %                    | 0.00398381  | 0.001766291 | -0.480029969 | NA             | NA                   |
| m.i  | M00577: Biotin biosynthesis, BioW pathway, pimelate   | : 4_CD56dim CD16+ % CD3-                     | 0.000589828 | 0.021667299 | -0.536245387 | NA             | NA                   |
| m.i  | M00577: Biotin biosynthesis, BioW pathway, pimelate   | : 4_CD56high CD16+ % CD3-                    | 0.00398381  | 0.001766291 | -0.480029969 | NA             | NA                   |
| m.i  | M00577: Biotin biosynthesis, BioW pathway, pimelate   | : 3_HLA-DR-CD4dim/- (ul)                     | 0.00328408  | 0.017336459 | -0.472415053 | NA             | NA                   |
| m.i  | M00161: Photosystem II                                | 2_FoxP3+ CD31- CD25high CD127low CD4+ (ul)   | 0.020036353 | 0.006231737 | -0.45875445  | NA             | DEPLETED-NS-NS       |
| m.i  | M00161: Photosystem II                                | 2_FoxP3+ CD45RA- CD25high CD127low CD4+ (ul) | 0.01290238  | 0.0104429   | -0.478808527 | NA             | DEPLETED-NS-NS       |
| m.i  | M00161: Photosystem II                                | 2_CD25high CD127low CD4+ (ul)                | 0.018305903 | 0.006917971 | -0.470663425 | NA             | DEPLETED-NS-NS       |

Table S7

| Test | Feature1                                              | Feature2                                        | CORONA_Q    | CORONA_LRP  | CORONA_R     | Feature1CORONA | Feature2CORONA       |
|------|-------------------------------------------------------|-------------------------------------------------|-------------|-------------|--------------|----------------|----------------------|
| m.i  | M00505: KinB-AlgB (alginate production) two-component | 4_CD56dim CD16+ % CD3-                          | 0.002392533 | 0.036657313 | -0.493285954 | NA             | NA                   |
| m.i  | M00505: KinB-AlgB (alginate production) two-component | 4_CD56dim CD16+ CD3- %                          | 0.002392533 | 0.036657313 | -0.493285954 | NA             | NA                   |
| m.i  | MF0046: sucrose degradation                           | 5_CD62L+ CD45RO+ CD8+ CD4- CD3+ (ul)            | 0.004559394 | 0.0161949   | -0.515710632 | NA             | NA                   |
| m.i  | M00533: Homoprotocatechuate degradation, homopro      | 3_CD4high %                                     | 0.016350887 | 0.000600604 | 0.465076973  | NA             | DEPLETED-NS-NS       |
| m.i  | M00533: Homoprotocatechuate degradation, homopro      | 1_CD4+ CD8- %                                   | 0.043046343 | 0.000624319 | 0.466822589  | NA             | DEPLETED-ENRICHED-NS |
| m.i  | M00533: Homoprotocatechuate degradation, homopro      | 5_CD8_Teff/Tn                                   | 0.044944486 | 0.001248552 | -0.42916001  | NA             | NA                   |
| m.i  | M00533: Homoprotocatechuate degradation, homopro      | 5_CD62L+ CD45RO- % CD8+ CD4-                    | 0.04763009  | 0.001850264 | 0.419752976  | NA             | DEPLETED-NS-NS       |
| m.i  | M00385: Cul4-DDB1-DDB2 complex                        | 2_CD31+ CD45RA- % -CD25high CD127low CD4+       | 0.018844175 | 0.000543184 | 0.478038725  | NA             | NA                   |
| m.i  | MF0055: xylose degradation                            | 5_CD24+ CD45RO+ % CD25- CD4+ CD4high CD8-       | 0.030438297 | 0.019112523 | -0.437147142 | NA             | NA                   |
| m.i  | MF0055: xylose degradation                            | 5_CD24+ CD45RO+ CD25- CD4+ CD8- CD3+ (ul)       | 0.017075405 | 0.006459091 | -0.478758483 | NA             | NA                   |
| m.i  | MF0055: xylose degradation                            | 5_CD24+ CD45RO+ CD25- CD4+ % CD4high CD8-       | 0.034516626 | 0.022756836 | -0.435382355 | NA             | NA                   |
| m.i  | MF0055: xylose degradation                            | 5_CD24+ CD45RO- % CD25+ CD4+ CD4high CD8-       | 0.024177827 | 0.005858343 | -0.464034973 | NA             | NA                   |
| m.i  | M00545: Trans-cinnamate degradation, trans-cinnama    | 5_CD62+ CD45RO+ % CD25- CD4+ CD4high CD8-       | 0.018631383 | 0.0227566   | -0.470247558 | NA             | NA                   |
| m.i  | M00545: Trans-cinnamate degradation, trans-cinnama    | 5_CD62L+ CD45RO+ CD25- CD4+ % CD4high CD8-      | 0.013158271 | 0.018368915 | -0.478465404 | NA             | NA                   |
| m.i  | M00545: Trans-cinnamate degradation, trans-cinnama    | 5_CD4_Tcm/Tcm                                   | 0.026153007 | 0.033244022 | -0.442836966 | NA             | ENRICHED-NS-ENRICHED |
| m.i  | M00458: ResE-ResD (aerobic and anaerobic respiratic   | 5_CD8_Tem/Treg                                  | 0.007160215 | 0.002159511 | 0.513445378  | NA             | NA                   |
| m.i  | M00458: ResE-ResD (aerobic and anaerobic respiratic   | 5_CD62L+ CD45RO+ CD25- CD4+ % CD4high CD8-      | 0.045069357 | 0.00019905  | -0.437670702 | NA             | NA                   |
| m.i  | M00458: ResE-ResD (aerobic and anaerobic respiratic   | 5_CD62+ CD45RO+ % CD25- CD4+ CD4high CD8-       | 0.045069357 | 0.000247202 | -0.429085596 | NA             | NA                   |
| m.i  | M00595: Thiosulfate oxidation by SOX complex, thiosu  | 5_CD62L+ CD45RO- CD25+ CD4+ CD8- CD3+ (ul)      | 0.047012092 | 0.033997947 | 0.417913843  | NA             | DEPLETED-ENRICHED-NS |
| m.i  | M00089: Triacylglycerol biosynthesis                  | 4_CD8+ CD4+ % CD56+ CD3+                        | 0.049735739 | 0.013471941 | -0.454923314 | NA             | NA                   |
| m.i  | M00089: Triacylglycerol biosynthesis                  | 3_CD14hi CD16- % HLA-DR+ CD16+/HLA-DR- CD16-    | 0.034590422 | 0.03905456  | -0.386806241 | NA             | ENRICHED-DEPLETED-NS |
| m.i  | MF0040: lysine degradation (cadaverine pathway)       | 5_CD8_Tem/Tcm                                   | 0.043738719 | 0.034993017 | 0.440559377  | NA             | NA                   |
| m.i  | M00455: TorS-TorR (TMAO respiration) two-compone      | 5_CD8_Tem/Tcm                                   | 0.038779971 | 0.026112437 | -0.399488491 | NA             | NA                   |
| m.i  | M00455: TorS-TorR (TMAO respiration) two-compone      | 3_HLA-DR-CD4dim/- (ul)                          | 0.000200451 | 0.01043719  | -0.578151261 | NA             | NA                   |
| m.i  | M00058: Glycosaminoglycan biosynthesis, chondroitin   | 1_CD19+ %                                       | 0.005528865 | 0.002455289 | -0.461589105 | NA             | DEPLETED-ENRICHED-NS |
| m.i  | M00058: Glycosaminoglycan biosynthesis, chondroitin   | 3_CD14- CD16- HLA-DR+ CD4dim/- %                | 0.044682977 | 0.017800638 | -0.383002039 | NA             | NA                   |
| m.i  | M00058: Glycosaminoglycan biosynthesis, chondroitin   | 1_CD4bright CD8dim % CD4+ CD8+ CD3+             | 0.017535259 | 0.006149617 | 0.462000678  | NA             | NA                   |
| m.i  | M00058: Glycosaminoglycan biosynthesis, chondroitin   | 1_CD4dim CD8bright % CD4+ CD8+ CD3+             | 0.017535259 | 0.009142931 | -0.462000678 | NA             | NA                   |
| m.i  | M00058: Glycosaminoglycan biosynthesis, chondroitin   | 5_CD24- CD45RO- % CD8+ CD4-                     | 0.022238167 | 0.000279739 | 0.449018421  | NA             | NS-DEPLETED-NS       |
| m.i  | MF0013: glutamate degradation (crotonyl-CoA pathwa    | 2_FoxP3- CD39+ % CD25high CD127low CD4+         | 0.03858007  | 0.009507355 | -0.469426198 | NA             | NA                   |
| m.i  | M00003: Gluconeogenesis, oxaloacetate => fructose-ε   | 3_CD14hi CD16- % HLA-DR+ CD16+/HLA-DR- CD16-    | 0.033788846 | 0.022435342 | -0.401256897 | NA             | ENRICHED-DEPLETED-NS |
| m.i  | M00003: Gluconeogenesis, oxaloacetate => fructose-ε   | 3_CD14hi CD16- HLA-DR+ CD16+/HLA-DR- CD16-%     | 0.033788846 | 0.031002984 | -0.404950902 | NA             | ENRICHED-DEPLETED-NS |
| m.i  | M00003: Gluconeogenesis, oxaloacetate => fructose-ε   | 1_CD4- CD8- %                                   | 0.045487799 | 0.040345671 | 0.400752727  | NA             | NA                   |
| m.i  | M00003: Gluconeogenesis, oxaloacetate => fructose-ε   | 3_HLA-DR+ CD4dim/- %                            | 0.009471839 | 0.023802573 | -0.461525814 | NA             | ENRICHED-NS-NS       |
| m.i  | M00308: Semi-phosphorylative Entner-Doudoroff path    | 3_HLA-DR-CD4dim/- (ul)                          | 0.00506917  | 0.025201968 | 0.497844355  | NA             | NA                   |
| m.i  | M00373: Ethylmalonyl pathway                          | 2_FoxP3+ CD45RA- CD25high CD127low % CD4+       | 0.046651283 | 0.00408392  | 0.400632156  | NA             | NA                   |
| m.i  | M00373: Ethylmalonyl pathway                          | 4_CD56high CD16+ % CD3-                         | 0.028927533 | 0.01254563  | -0.42231622  | NA             | NA                   |
| m.i  | M00373: Ethylmalonyl pathway                          | 4_CD56high CD16+ CD3- %                         | 0.028927533 | 0.01254563  | -0.42231622  | NA             | NA                   |
| m.i  | M00373: Ethylmalonyl pathway                          | 4_CD56high CD16+ CD3- (ul)                      | 0.017053583 | 0.01303633  | -0.447207125 | NA             | NA                   |
| m.i  | M00663: SsrA-SsrB two-component regulatory system     | 7_Helios+ IFNγ+ CD4+ CD3+ (ul)                  | 0.049809928 | 0.0032614   | 0.451806789  | NA             | NA                   |
| m.i  | MF0123: propionate production (propanediol pathway)   | 3_CD14hi CD16- HLA-DR+ CD16+/HLA-DR- CD16- (ul) | 0.02816843  | 0.032736057 | -0.468637821 | NA             | NA                   |
| m.i  | M00244: Putative zinc/manganese transport system      | 3_CD14hi CD16- % HLA-DR+ CD16+/HLA-DR- CD16-    | 0.025223    | 0.044897518 | -0.430947705 | NA             | ENRICHED-DEPLETED-NS |
| m.i  | M00244: Putative zinc/manganese transport system      | 5_CD8_Teff/Tn                                   | 0.034905092 | 0.033753072 | -0.412809763 | NA             | NA                   |
| m.i  | M00712: Multidrug resistance, efflux pump YkkCD       | 4_CD56dim CD16- CD3- %                          | 0.013593782 | 0.029133432 | 0.493216313  | NA             | NA                   |
| m.i  | M00463: TrcS-TrcR two-component regulatory system     | 2_FoxP3- CD45RA+ % CD25high CD127low CD4+       | 0.010739357 | 0.001636641 | -0.473766105 | NA             | NA                   |
| m.i  | M00463: TrcS-TrcR two-component regulatory system     | 2_FoxP3+ CD45RA- % CD25high CD127low CD4+       | 0.000847065 | 0.021891961 | 0.503800546  | NA             | NA                   |
| m.i  | M00463: TrcS-TrcR two-component regulatory system     | 2_CD31- CD45RA+ % -CD25high CD127low CD4+       | 0.003245631 | 0.009111647 | -0.506227101 | NA             | NA                   |
| m.i  | M00463: TrcS-TrcR two-component regulatory system     | 2_CD39- CD45RA+ % CD25high CD127low CD4+        | 0.006190253 | 0.025396724 | -0.493430311 | NA             | NA                   |
| m.i  | M00463: TrcS-TrcR two-component regulatory system     | 6_CD161+ CCR6- CXCR3- CD25- CD4+ (ul)           | 0.023096368 | 0.040387523 | -0.424537527 | NA             | NA                   |
| m.i  | MF0010: tyrosine degradation (phenol pathway)         | 2_CD31- CD45RA+ % -CD25high CD127low CD4+       | 0.03493933  | 0.007206477 | -0.394825087 | NA             | NA                   |
| m.i  | MF0010: tyrosine degradation (phenol pathway)         | 2_FoxP3+ CD45RA- % CD25high CD127low CD4+       | 0.006558031 | 0.020230987 | 0.457960317  | NA             | NA                   |
| m.i  | M00330: Adhesin protein transport system              | 2_CD25high CD127low % CD4+                      | 0.006235362 | 0.002468109 | 0.509902802  | NA             | NA                   |
| m.i  | M00330: Adhesin protein transport system              | 2_FoxP3+ CD31- % CD25high CD127low CD4+         | 0.007851957 | 0.020379916 | 0.495884532  | NA             | NA                   |
| m.i  | M00330: Adhesin protein transport system              | 2_FoxP3+ % CD25high CD127low CD4+               | 0.048091689 | 0.018610903 | 0.44224691   | NA             | NA                   |

Table S7

| Test | Feature1                                               | Feature2                                   | CORONA_Q    | CORONA_LRP  | CORONA_R     | Feature1CORONA | Feature2CORONA       |
|------|--------------------------------------------------------|--------------------------------------------|-------------|-------------|--------------|----------------|----------------------|
| m.i  | M00330: Adhesin protein transport system               | 2_FoxP3+ CD45RA- CD25high CD127low % CD4+  | 0.000644681 | 0.00067587  | 0.553989369  | NA             | NA                   |
| m.i  | M00330: Adhesin protein transport system               | 2_FoxP3+ CD31- CD25high CD127low % CD4+    | 0.001254254 | 0.001031132 | 0.541692551  | NA             | NA                   |
| m.i  | M00839: PdtA-S-PdtA-R two-component regulatory system  | 3_HLA-DR-CD4dim/- (ul)                     | 5.54751E-05 | 0.000703642 | -0.600840336 | NA             | NA                   |
| m.i  | M00839: PdtA-S-PdtA-R two-component regulatory system  | 1_CD4- CD8+ CD3+ (ul)                      | 0.000902641 | 0.00103504  | -0.53536719  | NA             | NA                   |
| m.i  | M00014: Glucuronate pathway (uronate pathway)          | 3_CD14- CD16- HLA-DR+ CD4dim/- %           | 0.024222214 | 0.039435019 | 0.417005418  | NA             | NA                   |
| m.i  | M00014: Glucuronate pathway (uronate pathway)          | 2_CD39+ CD31- % CD25high CD127low CD4+     | 0.04711413  | 0.049548796 | 0.37243761   | NA             | NA                   |
| m.i  | M00367: C10-C20 isoprenoid biosynthesis, non-plant     | 5_CD24+ CD45RO+ CD25- CD4+ CD8- CD3+ (ul)  | 0.016874487 | 0.001484961 | 0.47529184   | NA             | NA                   |
| m.i  | M00367: C10-C20 isoprenoid biosynthesis, non-plant     | 5_CD24+ CD45RO+ % CD25- CD4+ CD4high CD8-  | 0.023893337 | 0.002467689 | 0.454417559  | NA             | NA                   |
| m.i  | M00367: C10-C20 isoprenoid biosynthesis, non-plant     | 5_CD24+ CD45RO+ CD8+ CD4- CD3+ (ul)        | 0.037227447 | 0.014802575 | 0.420394965  | NA             | NS-ENRICHED-ENRICHED |
| m.i  | M00367: C10-C20 isoprenoid biosynthesis, non-plant     | 5_CD24+ CD45RO+ CD25- CD4+ % CD4high CD8-  | 0.018646871 | 0.002093627 | 0.460508288  | NA             | NA                   |
| m.i  | M00208: Glycine betaine/proline transport system       | 5_CD62L- CD45RO+ CD8+ CD4- CD3+ (ul)       | 0.000166154 | 0.033204497 | -0.577608491 | NA             | DEPLETED-ENRICHED-NS |
| m.i  | M00208: Glycine betaine/proline transport system       | 3_HLA-DR-CD4dim/- (ul)                     | 0.000277202 | 0.001184451 | -0.54288037  | NA             | NA                   |
| m.i  | M00208: Glycine betaine/proline transport system       | 1_CD4- CD8+ CD3+ (ul)                      | 0.000131962 | 0.00112956  | -0.581444843 | NA             | NA                   |
| m.i  | M00208: Glycine betaine/proline transport system       | 1_CD4- CD8+ %                              | 0.021909808 | 0.024759934 | -0.420103588 | NA             | NA                   |
| m.i  | M00591: Putative xylitol transport system              | 2_FoxP3+ CD45RA- % CD25high CD127low CD4+  | 0.000425227 | 0.045363522 | 0.555224645  | NA             | NA                   |
| m.i  | M00591: Putative xylitol transport system              | 2_FoxP3+ CD31- % CD25high CD127low CD4+    | 0.018237648 | 0.01625583  | 0.453981509  | NA             | NA                   |
| m.i  | M00501: PilS-PilR (type 4 fimbriae synthesis) two-com  | 5_CD62L- CD45RO- % CD25+ CD4+ CD4high CD8- | 0.019612956 | 0.03716558  | -0.419636166 | NA             | NA                   |
| m.i  | M00501: PilS-PilR (type 4 fimbriae synthesis) two-com  | 4_CD56high CD16- % CD3-                    | 0.034584036 | 0.046848736 | -0.460282807 | NA             | NA                   |
| m.i  | M00501: PilS-PilR (type 4 fimbriae synthesis) two-com  | 4_CD56high CD16+ CD3- %                    | 0.005092422 | 0.049584374 | -0.460534253 | NA             | NA                   |
| m.i  | M00501: PilS-PilR (type 4 fimbriae synthesis) two-com  | 4_CD56high CD16+ % CD3-                    | 0.005092422 | 0.049584374 | -0.460534253 | NA             | NA                   |
| m.i  | M00501: PilS-PilR (type 4 fimbriae synthesis) two-com  | 6_CD161+ CCR6- CXCR3- CD25+ % CD4+         | 0.0193977   | 0.049078989 | -0.459546133 | NA             | NA                   |
| m.i  | M00501: PilS-PilR (type 4 fimbriae synthesis) two-com  | 5_CD62L- CD45RO- CD25+ CD4+ % CD4high CD8- | 0.021330827 | 0.028249197 | -0.425134043 | NA             | NA                   |
| m.i  | M00501: PilS-PilR (type 4 fimbriae synthesis) two-com  | 4_CD56high CD16- CD3- %                    | 0.034584036 | 0.046848736 | -0.460282807 | NA             | NA                   |
| m.i  | M00555: Betaine biosynthesis, choline => betaine       | 5_CD62L+ CD45RO+ CD25- CD4+ % CD4high CD8- | 0.035902086 | 0.013725202 | -0.433419507 | NA             | NA                   |
| m.i  | M00555: Betaine biosynthesis, choline => betaine       | 5_CD62+ CD45RO+ % CD25- CD4+ CD4high CD8-  | 0.035902086 | 0.023647006 | -0.427464738 | NA             | NA                   |
| m.p  | M00288: RPA complex                                    | pulse_pressure                             | 0.013737656 | 0.017039605 | -0.482405763 | NA             | NS-NS-DEPLETED       |
| m.p  | M00104: Bile acid biosynthesis, cholesterol => cholate | eGFR                                       | 0.015056962 | 0.03344     | 0.415149949  | NA             | DEPLETED-NS-NS       |
| m.p  | M00104: Bile acid biosynthesis, cholesterol => cholate | pulse_pressure                             | 0.040004934 | 0.012004201 | -0.404335346 | NA             | NS-NS-DEPLETED       |
| m.p  | M00401: Sec61 complex                                  | pulse_pressure                             | 0.011375838 | 0.009099829 | -0.496105934 | NA             | NS-NS-DEPLETED       |
| m.p  | M00096: C5 isoprenoid biosynthesis, non-mevalonate     | pulse_pressure                             | 0.00161336  | 2.25892E-05 | -0.613581249 | NA             | NS-NS-DEPLETED       |
| m.p  | M00474: RcsC-RcsD-RcsB (capsule synthesis) two-cc      | pulse_pressure                             | 0.000337366 | 6.4513E-05  | 0.680741869  | NA             | NS-NS-DEPLETED       |
| m.p  | M00474: RcsC-RcsD-RcsB (capsule synthesis) two-cc      | eGFR                                       | 0.008866439 | 0.01421479  | -0.471412522 | NA             | DEPLETED-NS-NS       |
| m.p  | M00405: THC complex                                    | pulse_pressure                             | 0.025752061 | 0.00984699  | -0.435385634 | NA             | NS-NS-DEPLETED       |
| m.p  | M00339: RaxAB-RaxC type I secretion system             | eGFR                                       | 0.026365158 | 0.030071512 | -0.369126781 | NA             | DEPLETED-NS-NS       |
| m.p  | M00025: Tyrosine biosynthesis, chorismate => tyrosine  | pulse_pressure                             | 0.004189945 | 0.000318299 | -0.567922796 | NA             | NS-NS-DEPLETED       |
| m.p  | M00289: RF-C complex                                   | pulse_pressure                             | 0.009182824 | 0.040775959 | -0.513351093 | NA             | NS-NS-DEPLETED       |
| m.p  | M00804: Complete nitrification, comammox, ammonia      | pulse_pressure                             | 0.017367889 | 0.000448129 | 0.46327709   | NA             | NS-NS-DEPLETED       |
| m.p  | M00015: Proline biosynthesis, glutamate => proline     | pulse_pressure                             | 0.022137316 | 0.047658891 | -0.443155578 | NA             | NS-NS-DEPLETED       |
| m.p  | M00737: Bacitracin resistance, VraDE transporter       | triglycerol                                | 0.029752501 | 0.003607523 | 0.441592464  | NA             | DEPLETED-ENRICHED-NS |
| m.p  | M00525: Lysine biosynthesis, acetyl-DAP pathway, asj   | triglycerol                                | 0.02209868  | 0.004127922 | 0.45634824   | NA             | DEPLETED-ENRICHED-NS |
| m.p  | M00226: Histidine transport system                     | pulse_pressure                             | 0.007909267 | 0.001087733 | 0.522992081  | NA             | NS-NS-DEPLETED       |
| m.p  | MF0088: TCA cycle (Helicobacter pathway)               | PWV                                        | 0.000567531 | 0.004441032 | -0.62299675  | NA             | NS-NS-DEPLETED       |
| m.p  | MF0088: TCA cycle (Helicobacter pathway)               | pulse_pressure                             | 0.020780431 | 0.006747672 | -0.451701278 | NA             | NS-NS-DEPLETED       |
| m.p  | MF0110: glyoxylate bypass                              | pulse_pressure                             | 0.034445983 | 0.006617262 | -0.413611873 | NA             | NS-NS-DEPLETED       |
| m.p  | MF0110: glyoxylate bypass                              | PWV                                        | 0.000151967 | 0.025706198 | -0.665397965 | NA             | NS-NS-DEPLETED       |
| m.p  | M00615: Nitrate assimilation                           | CRP                                        | 0.032090124 | 0.001660096 | 0.452224341  | NA             | NA                   |
| m.p  | M00325: alpha-Hemolysin/cyclolysin transport system    | eGFR                                       | 0.026365158 | 0.027438435 | -0.366203873 | NA             | DEPLETED-NS-NS       |
| m.p  | M00646: Multidrug resistance, efflux pump AcrAD-TolC   | pulse_pressure                             | 0.01595887  | 0.010715919 | 0.470908756  | NA             | NS-NS-DEPLETED       |
| m.p  | M00646: Multidrug resistance, efflux pump AcrAD-TolC   | eGFR                                       | 0.026365158 | 0.015147601 | -0.378808915 | NA             | DEPLETED-NS-NS       |
| m.p  | M00740: Methylaspartate cycle                          | PWV                                        | 0.00238407  | 0.035130549 | -0.576526319 | NA             | NS-NS-DEPLETED       |
| m.p  | M00740: Methylaspartate cycle                          | pulse_pressure                             | 0.012179736 | 0.000240053 | -0.488407093 | NA             | NS-NS-DEPLETED       |
| m.p  | M00668: Tetracycline resistance, TetA transporter      | DBP_ABPM_day                               | 0.040420818 | 0.003757785 | -0.543636197 | NA             | NA                   |
| m.p  | M00668: Tetracycline resistance, TetA transporter      | DBP_ABPM_24h                               | 0.039174644 | 0.001148645 | -0.577144868 | NA             | NA                   |
| m.p  | M00668: Tetracycline resistance, TetA transporter      | pulse_pressure                             | 0.00861384  | 0.01598576  | 0.516262576  | NA             | NS-NS-DEPLETED       |



Table S7

| Test | Feature1                                             | Feature2       | CORONA_Q    | CORONA_LRP  | CORONA_R     | Feature1CORONA | Feature2CORONA       |
|------|------------------------------------------------------|----------------|-------------|-------------|--------------|----------------|----------------------|
| m.p  | M00821: Multidrug resistance, efflux pump TriABC-Tol | eGFR           | 0.026365158 | 0.031131334 | -0.367957618 | NA             | DEPLETED-NS-NS       |
| m.p  | M00497: GlnL-GlnG (nitrogen regulation) two-compon   | eGFR           | 0.026365158 | 0.020631364 | -0.373112652 | NA             | DEPLETED-NS-NS       |
| m.p  | M00532: Photorespiration                             | pulse_pressure | 0.011375838 | 0.000161575 | 0.495325041  | NA             | NS-NS-DEPLETED       |
| m.p  | MF0129: catalase                                     | pulse_pressure | 0.007909267 | 0.000312601 | 0.522550849  | NA             | NS-NS-DEPLETED       |
| m.p  | M00630: D-Galacturonate degradation (fungi), D-galac | eGFR           | 0.015056962 | 0.000624428 | -0.4324887   | NA             | DEPLETED-NS-NS       |
| m.p  | M00612: Anoxygenic photosynthesis in purple bacteria | PWV            | 8.64905E-05 | 0.011215942 | -0.695428769 | NA             | NS-NS-DEPLETED       |
| m.p  | M00127: Thiamine biosynthesis, AIR => thiamine-P/thi | pulse_pressure | 0.00161336  | 0.000411201 | -0.616429816 | NA             | NS-NS-DEPLETED       |
| m.p  | M00643: Multidrug resistance, efflux pump MexXY-Opi  | eGFR           | 0.030714415 | 0.016177772 | -0.35560833  | NA             | DEPLETED-NS-NS       |
| m.p  | M00643: Multidrug resistance, efflux pump MexXY-Opi  | pulse_pressure | 0.045285549 | 0.008277098 | 0.397008799  | NA             | NS-NS-DEPLETED       |
| m.p  | MF0007: phenylalanine degradation                    | HbA1C_IFCC     | 0.002964661 | 0.005169945 | 0.510950775  | NA             | NS-ENRICHED-NS       |
| m.p  | MF0007: phenylalanine degradation                    | HbA1C          | 0.002053752 | 0.004256151 | 0.518491673  | NA             | NS-ENRICHED-NS       |
| m.p  | MF0083: pyruvate dehydrogenase complex               | pulse_pressure | 0.017643454 | 0.000495452 | 0.46220028   | NA             | NS-NS-DEPLETED       |
| m.p  | M00178: Ribosome, bacteria                           | pulse_pressure | 0.00536231  | 0.018387641 | -0.550587233 | NA             | NS-NS-DEPLETED       |
| m.p  | M00261: DNA polymerase alpha / primase complex       | triglycerol    | 0.02209868  | 0.005212776 | 0.46954263   | NA             | DEPLETED-ENRICHED-NS |
| m.p  | M00440: Nickel transport system                      | IGF            | 0.009041694 | 0.013005391 | 0.502055631  | NA             | NS-ENRICHED-NS       |
| m.p  | M00676: PI3K-Akt signaling                           | cholesterol    | 0.0418311   | 0.048688872 | -0.421739119 | NA             | NA                   |
| m.p  | M00398: Sm core complex                              | pulse_pressure | 0.030219149 | 0.01130033  | -0.423072973 | NA             | NS-NS-DEPLETED       |
| m.p  | M00204: Trehalose/maltose transport system           | pulse_pressure | 0.011375838 | 0.032136141 | 0.495906667  | NA             | NS-NS-DEPLETED       |
| m.p  | MF0132: superoxide reductase                         | pulse_pressure | 0.029553447 | 0.000620429 | -0.425901403 | NA             | NS-NS-DEPLETED       |
| m.p  | M00042: Catecholamine biosynthesis, tyrosine => dop  | eGFR           | 0.004725977 | 0.039181417 | -0.515631654 | NA             | DEPLETED-NS-NS       |
| m.p  | MF0130: peroxidase                                   | pulse_pressure | 0.020024047 | 0.000650424 | 0.454387069  | NA             | NS-NS-DEPLETED       |
| m.p  | M00225: Lysine/arginine/ornithine transport system   | pulse_pressure | 0.007909267 | 0.000947322 | 0.521589013  | NA             | NS-NS-DEPLETED       |
| m.p  | M00709: Macrolide resistance, MacAB-TolC transporte  | pulse_pressure | 0.019103021 | 0.011165887 | 0.457398411  | NA             | NS-NS-DEPLETED       |
| m.p  | M00709: Macrolide resistance, MacAB-TolC transporte  | eGFR           | 0.026365158 | 0.011243344 | -0.3669346   | NA             | DEPLETED-NS-NS       |
| m.p  | MF0041: histidine degradation                        | pulse_pressure | 0.001977784 | 0.00018205  | 0.595675973  | NA             | NS-NS-DEPLETED       |
| m.p  | MF0068: glucarate degradation                        | pulse_pressure | 0.030219149 | 0.032769904 | 0.423860366  | NA             | NS-NS-DEPLETED       |
| m.p  | M00140: C1-unit interconversion, prokaryotes         | pulse_pressure | 0.00536231  | 0.00678191  | -0.551238334 | NA             | NS-NS-DEPLETED       |
| m.p  | M00613: Anoxygenic photosynthesis in green nonsulfu  | pulse_pressure | 0.030219149 | 0.026649139 | 0.42223896   | NA             | NS-NS-DEPLETED       |
| m.p  | M00628: beta-Lactam resistance, AmpC system          | pulse_pressure | 0.030219149 | 0.002613646 | 0.423541162  | NA             | NS-NS-DEPLETED       |
| m.p  | M00822: Multidrug resistance, efflux pump MexMN-Op   | eGFR           | 0.026365158 | 0.013101361 | -0.372780417 | NA             | DEPLETED-NS-NS       |
| m.p  | M00179: Ribosome, archaea                            | pulse_pressure | 0.007354957 | 0.045319331 | -0.529914778 | NA             | NS-NS-DEPLETED       |
| m.p  | M00191: Thiamine transport system                    | pulse_pressure | 0.017367889 | 0.005991012 | 0.463238244  | NA             | NS-NS-DEPLETED       |
| m.p  | M00376: 3-Hydroxypropionate bi-cycle                 | pulse_pressure | 0.030219149 | 0.026649139 | 0.42223896   | NA             | NS-NS-DEPLETED       |
| m.p  | MF0052: chondroitin sulfate and dermatan sulfate deg | eGFR           | 0.015056962 | 0.004079188 | -0.421081476 | NA             | DEPLETED-NS-NS       |
| m.p  | M00170: C4-dicarboxylic acid cycle, phosphoenolpyru  | pulse_pressure | 0.030219149 | 0.039101512 | -0.422727286 | NA             | NS-NS-DEPLETED       |
| m.p  | M00165: Reductive pentose phosphate cycle (Calvin c  | PWV            | 8.64905E-05 | 0.011215942 | -0.695428769 | NA             | NS-NS-DEPLETED       |
| m.p  | M00696: Multidrug resistance, efflux pump AcrEF-TolC | eGFR           | 0.026365158 | 0.029715596 | -0.371757399 | NA             | DEPLETED-NS-NS       |
| m.p  | M00436: Sulfonate transport system                   | CRP            | 0.032090124 | 0.015187397 | 0.447018547  | NA             | NA                   |
| m.p  | M00661: Paspaline biosynthesis, geranylgeranyl-PP +  | pulse          | 0.010087509 | 0.000237919 | 0.619079382  | NA             | NS-NS-DEPLETED       |
| m.p  | M00123: Biotin biosynthesis, pimeloyl-ACP/CoA => bic | eGFR           | 0.015056962 | 0.0077592   | -0.416002923 | NA             | DEPLETED-NS-NS       |
| m.p  | M00045: Histidine degradation, histidine => N-formim | pulse_pressure | 0.001836835 | 5.49592E-05 | 0.604303061  | NA             | NS-NS-DEPLETED       |
| m.p  | M00037: Melatonin biosynthesis, tryptophan => seroto | pulse_pressure | 0.020024047 | 0.011981913 | 0.454301802  | NA             | NS-NS-DEPLETED       |
| m.p  | MF0018: proline degradation (glutamate pathway)      | pulse_pressure | 0.00161336  | 0.000496899 | 0.618204697  | NA             | NS-NS-DEPLETED       |
| m.p  | M00611: Oxygenic photosynthesis in plants and cyano  | PWV            | 8.64905E-05 | 0.015582163 | -0.690220174 | NA             | NS-NS-DEPLETED       |
| m.p  | M00502: GlrK-GlrR (amino sugar metabolism) two-con   | pulse_pressure | 0.010867603 | 0.020438303 | 0.503262714  | NA             | NS-NS-DEPLETED       |
| m.p  | M00079: Keratan sulfate degradation                  | pulse_pressure | 0.006552678 | 0.000559322 | 0.534553873  | NA             | NS-NS-DEPLETED       |
| m.p  | M00256: Cell division transport system               | pulse_pressure | 0.01664002  | 0.03717943  | -0.468385739 | NA             | NS-NS-DEPLETED       |
| m.p  | M00647: Multidrug resistance, efflux pump AcrAB-TolC | pulse_pressure | 0.008230526 | 0.00053134  | 0.519334388  | NA             | NS-NS-DEPLETED       |
| m.p  | M00647: Multidrug resistance, efflux pump AcrAB-TolC | eGFR           | 0.026365158 | 0.019944102 | -0.371136281 | NA             | DEPLETED-NS-NS       |
| m.p  | MF0034: glutamine degradation (oxoglutarate pathway  | eGFR           | 0.020282142 | 0.039888115 | 0.40189989   | NA             | DEPLETED-NS-NS       |
| m.p  | MF0034: glutamine degradation (oxoglutarate pathway  | pulse_pressure | 0.00586006  | 0.000217734 | -0.545459813 | NA             | NS-NS-DEPLETED       |
| m.p  | MF0131: superoxide dismutase                         | pulse_pressure | 0.027845872 | 0.000729134 | 0.430214947  | NA             | NS-NS-DEPLETED       |
| m.p  | M00343: Archaeal proteasome                          | eGFR           | 0.045532148 | 0.001993501 | -0.3304862   | NA             | DEPLETED-NS-NS       |
| m.p  | M00293: DNA polymerase zeta complex                  | eGFR           | 0.038575898 | 0.035813979 | -0.340872139 | NA             | DEPLETED-NS-NS       |

Table S7

| Test | Feature1                                                 | Feature2       | CORONA_Q    | CORONA_LRP  | CORONA_R     | Feature1CORONA | Feature2CORONA       |
|------|----------------------------------------------------------|----------------|-------------|-------------|--------------|----------------|----------------------|
| m.p  | M00213: L-Arabinose transport system                     | pulse_pressure | 0.021220498 | 0.03202624  | 0.446668846  | NA             | NS-NS-DEPLETED       |
| m.p  | MF0031: asparagine degradation                           | WHR            | 0.03282472  | 0.024984561 | -0.428324793 | NA             | DEPLETED-NS-DEPLETED |
| m.p  | M00699: Multidrug resistance, efflux pump AmeABC         | eGFR           | 0.024518905 | 0.017437048 | -0.38286445  | NA             | DEPLETED-NS-NS       |
| m.p  | M00699: Multidrug resistance, efflux pump AmeABC         | pulse_pressure | 0.012179736 | 0.000980449 | 0.489058194  | NA             | NS-NS-DEPLETED       |
| m.p  | M00605: Glucose/mannose transport system                 | eGFR           | 0.033773162 | 0.025396489 | 0.347156506  | NA             | DEPLETED-NS-NS       |
| m.p  | M00027: GABA (gamma-Aminobutyrate) shunt                 | pulse_pressure | 0.016073901 | 0.003412999 | 0.470176267  | NA             | NS-NS-DEPLETED       |
| m.p  | M00285: MCM complex                                      | pulse_pressure | 0.029553447 | 0.007668285 | -0.425753049 | NA             | NS-NS-DEPLETED       |
| m.p  | M00734: BraS-BraR (bacitracin transport) two-compon      | triglycerol    | 0.02209868  | 0.004002125 | 0.457900359  | NA             | DEPLETED-ENRICHED-NS |
| m.p  | MF0061: mannose degradation                              | pulse_pressure | 0.030440393 | 0.036662679 | 0.420936758  | NA             | NS-NS-DEPLETED       |
| m.p  | M00554: Nucleotide sugar biosynthesis, galactose => l    | eGFR           | 0.030714415 | 0.021303314 | 0.353401109  | NA             | DEPLETED-NS-NS       |
| m.p  | M00570: Isoleucine biosynthesis, threonine => 2-oxob     | pulse_pressure | 0.01125009  | 0.002697268 | -0.500045523 | NA             | NS-NS-DEPLETED       |
| m.p  | MF0122: propionate production (succinate pathway)        | pulse_pressure | 0.011951628 | 0.000458977 | 0.491825373  | NA             | NS-NS-DEPLETED       |
| m.p  | MF0122: propionate production (succinate pathway)        | eGFR           | 0.020282142 | 0.038154875 | -0.402192181 | NA             | DEPLETED-NS-NS       |
| m.p  | M00076: Dermatan sulfate degradation                     | pulse_pressure | 0.016894954 | 0.026920389 | 0.466025498  | NA             | NS-NS-DEPLETED       |
| m.p  | M00270: PTS system, trehalose-specific II component      | DBP_ABPM_day   | 0.040420818 | 0.013754764 | -0.544953622 | NA             | NA                   |
| m.p  | M00360: Aminoacyl-tRNA biosynthesis, prokaryotes         | pulse_pressure | 0.011375838 | 0.034373134 | -0.495894754 | NA             | NS-NS-DEPLETED       |
| m.p  | M00284: Origin recognition complex                       | pulse_pressure | 0.010228621 | 0.0144038   | -0.506754461 | NA             | NS-NS-DEPLETED       |
| m.p  | M00049: Adenine ribonucleotide biosynthesis, IMP =>      | pulse_pressure | 0.009190244 | 0.010183528 | -0.512579216 | NA             | NS-NS-DEPLETED       |
| m.p  | M00393: TRAMP complex                                    | pulse_pressure | 0.011354146 | 0.026511476 | -0.497808307 | NA             | NS-NS-DEPLETED       |
| m.p  | M00529: Denitrification, nitrate => nitrogen             | pulse_pressure | 0.016825654 | 0.002615513 | 0.467061767  | NA             | NS-NS-DEPLETED       |
| m.p  | M00078: Heparan sulfate degradation                      | pulse_pressure | 0.019456665 | 0.004842093 | 0.456258984  | NA             | NS-NS-DEPLETED       |
| m.p  | MF0009: tryptophan degradation                           | pulse_pressure | 0.037266605 | 0.032142771 | 0.408810003  | NA             | NS-NS-DEPLETED       |
| m.p  | M00641: Multidrug resistance, efflux pump MexEF-Opr      | eGFR           | 0.015056962 | 0.014813665 | -0.417212433 | NA             | DEPLETED-NS-NS       |
| m.p  | MF0008: tyrosine degradation (hydroxyphenylacetalde      | HbA1C          | 0.002053752 | 0.002669103 | 0.52706284   | NA             | NS-ENRICHED-NS       |
| m.p  | MF0008: tyrosine degradation (hydroxyphenylacetalde      | HbA1C_IFCC     | 0.002964661 | 0.003169346 | 0.519723075  | NA             | NS-ENRICHED-NS       |
| m.p  | M00002: Glycolysis, core module involving three-carbc    | PWV            | 0.000151967 | 0.017826351 | -0.669955486 | NA             | NS-NS-DEPLETED       |
| m.p  | M00192: Putative thiamine transport system               | pulse_pressure | 0.043793527 | 0.015771541 | 0.399478981  | NA             | NS-NS-DEPLETED       |
| m.p  | M00019: Valine/isoleucine biosynthesis, pyruvate => v    | pulse_pressure | 0.021634127 | 0.01364411  | -0.445190268 | NA             | NS-NS-DEPLETED       |
| m.p  | M00120: Coenzyme A biosynthesis, pantothenate => C       | pulse_pressure | 0.001965512 | 0.00080436  | -0.600152292 | NA             | NS-NS-DEPLETED       |
| m.p  | M00120: Coenzyme A biosynthesis, pantothenate => C       | eGFR           | 0.02947692  | 0.017473836 | 0.355684652  | NA             | DEPLETED-NS-NS       |
| m.p  | M00471: NarX-NarL (nitrate respiration) two-componer     | pulse_pressure | 0.023487708 | 0.00475291  | 0.440324852  | NA             | NS-NS-DEPLETED       |
| m.p  | M00697: Multidrug resistance, efflux pump MdtEF-TolC     | eGFR           | 0.026365158 | 0.031247351 | -0.370149799 | NA             | DEPLETED-NS-NS       |
| m.p  | M00718: Multidrug resistance, efflux pump MexAB-Opr      | pulse_pressure | 0.014983517 | 0.001052887 | 0.474815361  | NA             | NS-NS-DEPLETED       |
| m.p  | M00718: Multidrug resistance, efflux pump MexAB-Opr      | eGFR           | 0.023801949 | 0.016447929 | -0.386152722 | NA             | DEPLETED-NS-NS       |
| m.p  | M00166: Reductive pentose phosphate cycle, ribulose      | PWV            | 0.000451285 | 0.040811116 | -0.635448546 | NA             | NS-NS-DEPLETED       |
| m.p  | M00022: Shikimate pathway, phosphoenolpyruvate + e       | pulse_pressure | 0.019103021 | 0.024294243 | -0.457561186 | NA             | NS-NS-DEPLETED       |
| m.p  | MF0062: starch degradation                               | pulse_pressure | 0.00161336  | 0.000110076 | -0.613092924 | NA             | NS-NS-DEPLETED       |
| m.p  | M00229: Arginine transport system                        | pulse_pressure | 0.006408013 | 0.003074112 | 0.537231084  | NA             | NS-NS-DEPLETED       |
| m.p  | MF0037: arginine degradation (AST/succinyltransferas     | pulse_pressure | 0.006547539 | 0.002141004 | 0.535552222  | NA             | NS-NS-DEPLETED       |
| m.p  | M00573: Biotin biosynthesis, Biol pathway, long-chain-   | eGFR           | 0.015056962 | 0.0077592   | -0.416002923 | NA             | DEPLETED-NS-NS       |
| m.p  | M00337: Immunoproteasome                                 | eGFR           | 0.008110619 | 0.038664901 | 0.480424334  | NA             | DEPLETED-NS-NS       |
| m.p  | MF0102: mucin degradation                                | pulse_pressure | 0.006043629 | 0.000255681 | 0.540576556  | NA             | NS-NS-DEPLETED       |
| m.p  | M00267: PTS system, N-acetylglucosamine-specific II      | weight         | 0.043426991 | 0.013084985 | 0.402287197  | NA             | DEPLETED-NS-DEPLETED |
| m.p  | M00010: Citrate cycle, first carbon oxidation, oxaloacel | pulse_pressure | 0.007475082 | 0.000239796 | -0.526659274 | NA             | NS-NS-DEPLETED       |
| m.p  | M00017: Methionine biosynthesis, apartate => homose      | pulse_pressure | 0.011951628 | 0.003389408 | -0.491906761 | NA             | NS-NS-DEPLETED       |
| m.p  | MF0105: nitrate reduction (denitrification)              | pulse_pressure | 0.014983517 | 0.001534671 | 0.475222299  | NA             | NS-NS-DEPLETED       |
| m.p  | M00052: Pyrimidine ribonucleotide biosynthesis, UMP      | pulse_pressure | 0.002050317 | 0.003410531 | -0.592664631 | NA             | NS-NS-DEPLETED       |
| m.p  | MF0014: glutamate degradation (4-aminobutanoate pa       | pulse_pressure | 0.005016524 | 0.000267195 | 0.561086236  | NA             | NS-NS-DEPLETED       |
| m.p  | MF0104: nitrate reduction (dissimilatory)                | pulse_pressure | 0.014983517 | 0.001561192 | 0.474245648  | NA             | NS-NS-DEPLETED       |
| m.p  | MF0104: nitrate reduction (dissimilatory)                | eGFR           | 0.015056962 | 0.047739424 | -0.413854838 | NA             | DEPLETED-NS-NS       |
| m.p  | M00449: CreC-CreB (phosphate regulation) two-comp        | pulse_pressure | 0.013065961 | 0.002396737 | 0.485303511  | NA             | NS-NS-DEPLETED       |
| m.p  | M00449: CreC-CreB (phosphate regulation) two-comp        | eGFR           | 0.040332646 | 0.002989445 | -0.336560273 | NA             | DEPLETED-NS-NS       |
| m.p  | M00197: Putative fructooligosaccharide transport syste   | eGFR           | 0.047353805 | 0.021424912 | 0.329484837  | NA             | DEPLETED-NS-NS       |
| m.p  | MF0032: glutamine degradation (ammonia pathway)          | pulse_pressure | 0.007909267 | 0.00011464  | 0.521450466  | NA             | NS-NS-DEPLETED       |

Table S7

| Test | Feature1                                               | Feature2           | CORONA_Q    | CORONA_LRP  | CORONA_R     | Feature1CORONA | Feature2CORONA             |
|------|--------------------------------------------------------|--------------------|-------------|-------------|--------------|----------------|----------------------------|
| m.p  | M00303: PTS system, N-acetylmuramic acid-specific II   | WHR                | 0.029653275 | 0.049058543 | -0.438285589 | NA             | DEPLETED-NS-DEPLETED       |
| m.p  | M00157: F-type ATPase, prokaryotes and chloroplasts    | pulse_pressure     | 0.012062608 | 0.017402199 | -0.490930109 | NA             | NS-NS-DEPLETED             |
| m.p  | M00417: Cytochrome o ubiquinol oxidase                 | pulse_pressure     | 0.018748135 | 0.02733967  | 0.45896361   | NA             | NS-NS-DEPLETED             |
| m.p  | M00498: NtrY-NtrX (nitrogen regulation) two-component  | pulse_pressure     | 0.005750865 | 0.003914247 | 0.547231819  | NA             | NS-NS-DEPLETED             |
| m.p  | M00746: Multidrug resistance, repression of porin Omf  | eGFR               | 0.015056962 | 0.025266452 | -0.419813268 | NA             | DEPLETED-NS-NS             |
| m.p  | M00746: Multidrug resistance, repression of porin Omf  | pulse_pressure     | 0.04497102  | 0.009451429 | 0.39792236   | NA             | NS-NS-DEPLETED             |
| m.p  | M00051: Uridine monophosphate biosynthesis, glutam     | pulse_pressure     | 0.000778587 | 0.002506587 | -0.652240368 | NA             | NS-NS-DEPLETED             |
| m.p  | M00068: Glycosphingolipid biosynthesis, globo-series,  | eGFR               | 0.038575898 | 0.001730519 | 0.341252907  | NA             | DEPLETED-NS-NS             |
| m.p  | M00068: Glycosphingolipid biosynthesis, globo-series,  | pulse_pressure     | 0.012179736 | 0.004018342 | -0.489290332 | NA             | NS-NS-DEPLETED             |
| m.p  | M00326: RTX toxin transport system                     | eGFR               | 0.026365158 | 0.030952805 | -0.376909024 | NA             | DEPLETED-NS-NS             |
| m.p  | M00575: Pertussis pathogenicity signature 2, T1SS      | eGFR               | 0.028967087 | 0.027526138 | -0.360759956 | NA             | DEPLETED-NS-NS             |
| m.p  | M00575: Pertussis pathogenicity signature 2, T1SS      | pulse_pressure     | 0.014983517 | 0.04912345  | 0.475466462  | NA             | NS-NS-DEPLETED             |
| m.p  | M00527: Lysine biosynthesis, DAP aminotransferase      | pulse_pressure     | 0.014983517 | 0.00109207  | -0.476850052 | NA             | NS-NS-DEPLETED             |
| m.p  | M00335: Sec (secretion) system                         | pulse_pressure     | 0.011354146 | 0.010372597 | -0.497929445 | NA             | NS-NS-DEPLETED             |
| m.p  | M00720: Multidrug resistance, efflux pump VexEF-Tol    | eGFR               | 0.026365158 | 0.031131334 | -0.367957618 | NA             | DEPLETED-NS-NS             |
| m.p  | M00579: Phosphate acetyltransferase-acetate kinase     | pulse_pressure     | 0.010867603 | 0.013978814 | -0.503301027 | NA             | NS-NS-DEPLETED             |
| m.p  | M00530: Dissimilatory nitrate reduction, nitrate =>    | amn pulse_pressure | 0.004011732 | 0.000107562 | 0.57087588   | NA             | NS-NS-DEPLETED             |
| m.p  | M00530: Dissimilatory nitrate reduction, nitrate =>    | amn WHR            | 0.029653275 | 0.013372944 | -0.473778923 | NA             | DEPLETED-NS-DEPLETED       |
| m.p  | M00466: NblS-NblR (photosynthesis) two-component       | r body_fat_ratio   | 0.006076298 | 0.019650045 | 0.49362076   | NA             | ENRICHED-DEPLETED-DEPLETED |
| m.p  | M00577: Biotin biosynthesis, BioW pathway, pimelate    | eGFR               | 0.015056962 | 0.010026176 | -0.416149068 | NA             | DEPLETED-NS-NS             |
| m.p  | M00048: Inosine monophosphate biosynthesis, PRPP       | pulse_pressure     | 0.000337366 | 3.93902E-05 | -0.677551917 | NA             | NS-NS-DEPLETED             |
| m.p  | M00048: Inosine monophosphate biosynthesis, PRPP       | Aix                | 0.030320696 | 0.020633997 | -0.591352977 | NA             | NA                         |
| m.p  | M00048: Inosine monophosphate biosynthesis, PRPP       | PWV                | 0.000151967 | 0.002244391 | -0.667920878 | NA             | NS-NS-DEPLETED             |
| m.p  | M00279: PTS system, galactitol-specific II component   | CRP                | 0.046257955 | 0.01669027  | 0.42039903   | NA             | NA                         |
| m.p  | M00346: Formaldehyde assimilation, serine pathway      | pulse_pressure     | 0.001977784 | 0.004917146 | -0.596164299 | NA             | NS-NS-DEPLETED             |
| m.p  | M00488: DcuS-DcuR (C4-dicarboxylate metabolism)        | tv pulse_pressure  | 0.025752061 | 0.020954307 | 0.435544553  | NA             | NS-NS-DEPLETED             |
| m.p  | MF0016: glycine degradation                            | pulse_pressure     | 0.01125009  | 0.001698586 | 0.500452461  | NA             | NS-NS-DEPLETED             |
| m.p  | M00340: Proteasome, 20S core particle                  | eGFR               | 0.008110619 | 0.03474487  | 0.480156967  | NA             | DEPLETED-NS-NS             |
| m.p  | M00305: PTS system, 2-O-A-mannosyl-D-glycerate-sp      | pulse_pressure     | 0.001674152 | 0.017779905 | 0.609269913  | NA             | NS-NS-DEPLETED             |
| m.p  | M00698: Multidrug resistance, efflux pump BpeEF-Opr    | pulse_pressure     | 0.01097419  | 0.005225637 | 0.502242988  | NA             | NS-NS-DEPLETED             |
| m.p  | M00182: RNA polymerase I, eukaryotes                   | pulse_pressure     | 0.021634127 | 0.007121182 | -0.444809134 | NA             | NS-NS-DEPLETED             |
| m.p  | M00768: Multidrug resistance, efflux pump GesABC       | eGFR               | 0.026365158 | 0.013101361 | -0.372780417 | NA             | DEPLETED-NS-NS             |
| m.p  | M00642: Multidrug resistance, efflux pump MexJK-Opr    | pulse_pressure     | 0.036073824 | 0.002657264 | 0.411088857  | NA             | NS-NS-DEPLETED             |
| m.p  | M00241: Vitamin B12 transport system                   | pulse_pressure     | 0.008249814 | 0.011909577 | 0.518473875  | NA             | NS-NS-DEPLETED             |
| m.p  | M00571: AlgE-type Mannuronan C-5-Epimerase trans       | eGFR               | 0.026365158 | 0.031131334 | -0.367957618 | NA             | DEPLETED-NS-NS             |
| m.p  | M00456: ArcB-ArcA (anoxic redox control) two-compo     | pulse_pressure     | 0.002050317 | 0.002206128 | 0.590977433  | NA             | NS-NS-DEPLETED             |
| m.p  | M00456: ArcB-ArcA (anoxic redox control) two-compo     | DBP_ABPM_24h       | 0.039174644 | 0.015541217 | -0.553311401 | NA             | NA                         |
| m.p  | M00456: ArcB-ArcA (anoxic redox control) two-compo     | DBP_ABPM_day       | 0.03575926  | 0.018624196 | -0.567807166 | NA             | NA                         |
| m.p  | M00712: Multidrug resistance, efflux pump YkkCD        | SBP_ABPM_nocturn   | 0.025854704 | 0.00228558  | 0.595531061  | NA             | NA                         |
| m.p  | M00236: Putative polar amino acid transport system     | pulse_pressure     | 0.011354146 | 0.006566419 | -0.498336383 | NA             | NS-NS-DEPLETED             |
| m.p  | M00806: PTS system, maltose-specific II component      | WHR                | 0.029653275 | 0.035503368 | -0.444026272 | NA             | DEPLETED-NS-DEPLETED       |
| m.p  | M00029: Urea cycle                                     | pulse_pressure     | 0.027845872 | 0.001378903 | -0.430214947 | NA             | NS-NS-DEPLETED             |
| m.p  | M00504: DctB-DctD (C4-dicarboxylate transport) two-c   | pulse_pressure     | 0.009379035 | 0.009497819 | 0.511157124  | NA             | NS-NS-DEPLETED             |
| m.p  | M00455: TorS-TorR (TMAO respiration) two-compone       | pulse_pressure     | 0.00536231  | 0.000697561 | 0.551808047  | NA             | NS-NS-DEPLETED             |
| m.p  | M00003: Gluconeogenesis, oxaloacetate => fructose-6    | PWV                | 2.63038E-05 | 0.010939537 | -0.73376077  | NA             | NS-NS-DEPLETED             |
| m.p  | MF0013: glutamate degradation (crotonyl-CoA pathwa     | HbA1C              | 0.02016418  | 0.006634295 | 0.458598799  | NA             | NS-ENRICHED-NS             |
| m.p  | MF0013: glutamate degradation (crotonyl-CoA pathwa     | HbA1C_IFCC         | 0.01184103  | 0.004887758 | 0.471374516  | NA             | NS-ENRICHED-NS             |
| m.p  | M00373: Ethylmalonyl pathway                           | pulse_pressure     | 0.036707855 | 0.003872679 | 0.409803258  | NA             | NS-NS-DEPLETED             |
| m.p  | M00610: PTS system, D-glucosamine-specific II com      | DBP_ABPM_24h       | 0.039174644 | 0.001358802 | -0.563915357 | NA             | NA                         |
| m.p  | M00610: PTS system, D-glucosamine-specific II com      | DBP_ABPM_day       | 0.03575926  | 0.001712545 | -0.580140421 | NA             | NA                         |
| m.p  | MF0051: sucrose degradation (Actinobacteria)           | weight             | 0.043426991 | 0.025920418 | 0.418692169  | NA             | DEPLETED-NS-DEPLETED       |
| m.p  | M00028: Ornithine biosynthesis, glutamate => ornithine | pulse_pressure     | 0.032137679 | 0.01164706  | -0.417355703 | NA             | NS-NS-DEPLETED             |
| m.p  | M00518: GlnK-GlnL (glutamine utilization) two-compon   | pulse_pressure     | 0.014624308 | 0.003293448 | 0.479045642  | NA             | NS-NS-DEPLETED             |
| m.p  | M00839: PtdaS-PtdaR two-component regulatory syste     | pulse_pressure     | 0.017025391 | 0.002644672 | 0.46529301   | NA             | NS-NS-DEPLETED             |

Table S7

| Test | Feature1                                             | Feature2                                     | CORONA_Q    | CORONA_LRP  | CORONA_R     | Feature1CORONA                  | Feature2CORONA       |
|------|------------------------------------------------------|----------------------------------------------|-------------|-------------|--------------|---------------------------------|----------------------|
| m.p  | M00208: Glycine betaine/proline transport system     | Aix                                          | 0.049946924 | 0.028364488 | 0.545970262  | NA                              | NA                   |
| m.p  | M00208: Glycine betaine/proline transport system     | pulse_pressure                               | 0.001613336 | 0.000385415 | 0.616022878  | NA                              | NS-NS-DEPLETED       |
| m.i  | unknown Ruminococcaceae [meta_mOTU_v2_6905]          | 5_CD8_Tem/Tcm                                | 0.000864564 | 0.001265011 | 0.550628062  | NA                              | NA                   |
| m.i  | Bacteroides rodentium/uniformis [ref_mOTU_v2_0899]   | 2_FoxP3- CD45RA+ % CD25high CD127low CD4+    | 0.01954072  | 0.002126492 | -0.476092988 | NA                              | NA                   |
| m.i  | Bacteroides rodentium/uniformis [ref_mOTU_v2_0899]   | 2_CD39- CD45RA+ % CD25high CD127low CD4+     | 0.014757681 | 0.027777017 | -0.493803808 | NA                              | NA                   |
| m.i  | Bacteroides rodentium/uniformis [ref_mOTU_v2_0899]   | 6_CD161+ CCR6- CXCR3- CD25- CD4+ (ul)        | 0.035252385 | 0.042835375 | -0.412791834 | NA                              | NA                   |
| m.i  | Bacteroides rodentium/uniformis [ref_mOTU_v2_0899]   | 2_FoxP3+ CD39+ CD25high CD127low % CD4+      | 0.000650598 | 0.049507223 | 0.555791134  | NA                              | NA                   |
| m.i  | Bacteroides rodentium/uniformis [ref_mOTU_v2_0899]   | 2_CD31- CD45RA+ % -CD25high CD127low CD4+    | 0.005183241 | 0.007886905 | -0.515970429 | NA                              | NA                   |
| m.i  | Bacteroides rodentium/uniformis [ref_mOTU_v2_0899]   | 2_FoxP3+ CD45RA- % CD25high CD127low CD4+    | 0.000608664 | 0.018990231 | 0.526681791  | NA                              | NA                   |
| m.i  | Blautia wexlerae [ref_mOTU_v2_0466]                  | 5_CD24+ CD45RO- % CD8+ CD4-                  | 0.043306753 | 0.039394107 | 0.406667095  | NA                              | NS-ENRICHED-NS       |
| m.i  | Blautia wexlerae [ref_mOTU_v2_0466]                  | 4_CD56dim CD16+ CD3- %                       | 0.034029619 | 0.008258712 | -0.432003802 | NA                              | NA                   |
| m.i  | Blautia wexlerae [ref_mOTU_v2_0466]                  | 4_CD56dim CD16+ % CD3-                       | 0.034029619 | 0.008258712 | -0.432003802 | NA                              | NA                   |
| m.i  | Blautia wexlerae [ref_mOTU_v2_0466]                  | 1_CD19+ %                                    | 0.034029619 | 0.007219053 | 0.428905537  | NA                              | DEPLETED-ENRICHED-NS |
| m.i  | unknown Clostridiales [meta_mOTU_v2_7018]            | 2_FoxP3+ CD31- CD25high CD127low % CD4+      | 0.000495598 | 0.047124801 | -0.541538327 | ENRICHED-DEplete NA             |                      |
| m.i  | unknown Clostridiales [meta_mOTU_v2_7018]            | 6_CD27dim % CXCR3+ CD25- CD4+                | 0.036204524 | 0.048215885 | 0.434447767  | ENRICHED-DEplete NA             |                      |
| m.i  | unknown Clostridiales [meta_mOTU_v2_7018]            | 2_FoxP3+ CD31- CD25high CD127low CD4+ (ul)   | 0.044125969 | 0.041718425 | -0.4177364   | ENRICHED-DEplete DEPLETED-NS-NS |                      |
| m.i  | unknown Clostridiales [meta_mOTU_v2_7018]            | 5_CD4_Teff/2_Treg                            | 0.020438309 | 0.000776279 | 0.462534412  | ENRICHED-DEplete NA             |                      |
| m.i  | unknown Clostridiales [meta_mOTU_v2_7018]            | 2_FoxP3+ CD45RA- CD25high CD127low CD4+ (ul) | 0.040550974 | 0.03587068  | -0.40855213  | ENRICHED-DEplete DEPLETED-NS-NS |                      |
| m.i  | unknown Clostridiales [meta_mOTU_v2_7018]            | 2_CD25high CD127low % CD4+                   | 0.001564954 | 0.022451394 | -0.539566482 | ENRICHED-DEplete NA             |                      |
| m.i  | unknown Prevotella [meta_mOTU_v2_7342]               | 2_FoxP3+ CD45RA- % CD25high CD127low CD4+    | 0.041479481 | 0.040545205 | -0.353175362 | NA                              | NA                   |
| m.i  | unknown Clostridiales [meta_mOTU_v2_5745]            | 9_IFNg+ TNFa- Va7.2+ CD161 % CD3+            | 0.008128884 | 0.025769969 | 0.506626213  | NA                              | DEPLETED-NS-NS       |
| m.i  | unknown Eggerthella [meta_mOTU_v2_7082]              | 4_CD8- CD4- CD56+ CD3+ %                     | 0.000275966 | 0.033478701 | 0.570856068  | NA                              | NA                   |
| m.i  | unknown Clostridiales [meta_mOTU_v2_6049]            | 4_CD56dim CD16 high % CD56+ CD3-             | 0.047404145 | 0.036608291 | 0.427195258  | NA                              | NA                   |
| m.i  | Phascolarctobacterium succinatutens [ref_mOTU_v2_16] | 6_CD161+ CCR6+ CXCR3- CD25+ % CD4+           | 0.011013293 | 0.002015529 | 0.500161066  | NA                              | NA                   |
| m.i  | Phascolarctobacterium succinatutens [ref_mOTU_v2_16] | 6_CD161+ CCR6+ CXCR3- CD25+ CD4+ (ul)        | 0.01684085  | 0.004371264 | 0.49089354   | NA                              | DEPLETED-NS-NS       |
| m.i  | Phascolarctobacterium succinatutens [ref_mOTU_v2_14] | 4_CD56high CD16+ CD3- (ul)                   | 0.033890947 | 0.007670003 | 0.409039827  | NA                              | NA                   |
| m.i  | Phascolarctobacterium succinatutens [ref_mOTU_v2_12] | 2_FoxP3+ CD31- % CD25high CD127low CD4+      | 0.03038544  | 0.006305296 | -0.421894388 | NA                              | NA                   |
| m.i  | Phascolarctobacterium succinatutens [ref_mOTU_v2_12] | 2_FoxP3+ % CD25high CD127low CD4+            | 0.028303662 | 0.005170595 | -0.426311503 | NA                              | NA                   |
| m.i  | Phascolarctobacterium succinatutens [ref_mOTU_v2_14] | 4_CD56dim CD16+ CD3- (ul)                    | 0.028303662 | 0.042084705 | 0.412301241  | NA                              | NA                   |
| m.i  | Senegalimassilia anaerobia [ref_mOTU_v2_1606]        | 0_IL-17a+ IFNg+ TCRgd+ CD4- CD3+ (ul)        | 0.009343265 | 0.001406004 | 0.503678354  | NA                              | DEPLETED-NS-NS       |
| m.i  | Senegalimassilia anaerobia [ref_mOTU_v2_1606]        | 5_CD24- CD45RO- CD8+ CD4- CD3+ (ul)          | 0.004672373 | 0.001628477 | 0.494931387  | NA                              | NA                   |
| m.i  | unknown Clostridiales [meta_mOTU_v2_5411]            | 8_GM-CSF+ IL-2+ IL-17a- % CD3+               | 0.022280263 | 0.013048313 | -0.44607639  | NA                              | NA                   |
| m.i  | unknown Clostridiales [meta_mOTU_v2_5411]            | 8_GM-CSF+ IL-2- % IL-17a- CD3+               | 0.039297143 | 0.042489874 | -0.400621626 | NA                              | DEPLETED-ENRICHED-NS |
| m.i  | unknown Clostridiales [meta_mOTU_v2_5411]            | 8_TNFA- IL-2+ IL-17a- % CD3+                 | 0.020950754 | 0.002028827 | -0.442987501 | NA                              | NA                   |
| m.i  | unknown Clostridiales [meta_mOTU_v2_5411]            | 8_GM-CSF+ IL-2- IL-17a- % CD3+               | 0.04012809  | 0.043048301 | -0.400808745 | NA                              | DEPLETED-ENRICHED-NS |
| m.i  | unknown Clostridiales [meta_mOTU_v2_5411]            | 8_GM-CSF- IL-2- IL-17a- % CD3+               | 0.014892573 | 0.021761236 | 0.493604114  | NA                              | NA                   |
| m.i  | unknown Clostridiales [meta_mOTU_v2_5411]            | 8_IL-10- IL-2- IL-17a- % CD3+                | 0.032491194 | 0.002705095 | 0.436769515  | NA                              | NA                   |
| m.i  | unknown Clostridiales [meta_mOTU_v2_5411]            | 8_GM-CSF+ IL-2+ % IL-17a- CD3+               | 0.021507737 | 0.011789688 | -0.446973218 | NA                              | NA                   |
| m.i  | unknown Clostridiales [meta_mOTU_v2_5411]            | 8_TNFA- IL-2+ % IL-17a- CD3+                 | 0.023688272 | 0.00204167  | -0.43981663  | NA                              | NA                   |
| m.i  | unknown Clostridiales [meta_mOTU_v2_5411]            | 8_GM-CSF+ IL-2+ IL-17a- CD4+ CD3+ (ul)       | 0.013700736 | 0.021765683 | -0.492086671 | NA                              | NS-ENRICHED-NS       |
| m.i  | Blautia producta [ref_mOTU_v2_4020]                  | 5_CD62L+ CD45RO+ CD25- CD4+ % CD4high CD8-   | 0.002030467 | 0.013993817 | 0.530530853  | NA                              | NA                   |
| m.i  | Blautia producta [ref_mOTU_v2_4020]                  | 2_CD25high CD127low % CD4+                   | 0.002331067 | 0.030382241 | 0.503721643  | NA                              | NA                   |
| m.i  | Blautia producta [ref_mOTU_v2_4020]                  | 5_CD4_Teff/Treg                              | 0.013590619 | 0.001089069 | -0.44616478  | NA                              | ENRICHED-NS-NS       |
| m.i  | Blautia producta [ref_mOTU_v2_4020]                  | 2_FoxP3+ CD45RA- CD25high CD127low % CD4+    | 2.81777E-05 | 0.00099667  | 0.60759953   | NA                              | NA                   |
| m.i  | Blautia producta [ref_mOTU_v2_4020]                  | 5_CD62+ CD45RO+ % CD25- CD4+ CD4high CD8-    | 0.002471723 | 0.017517585 | 0.530769366  | NA                              | NA                   |
| m.i  | Blautia producta [ref_mOTU_v2_4020]                  | 2_FoxP3+ CD45RA- % CD25high CD127low CD4+    | 4.02233E-05 | 0.000160679 | 0.602161377  | NA                              | NA                   |
| m.i  | Blautia producta [ref_mOTU_v2_4020]                  | 5_CD4_Teff/2_Treg                            | 0.004273221 | 0.001046739 | -0.529590701 | NA                              | NA                   |
| m.i  | Blautia producta [ref_mOTU_v2_4020]                  | 5_CD62L+ CD45RO+ CD25+ CD4+ % CD4high CD8-   | 0.020656525 | 0.009087415 | 0.464436588  | NA                              | NA                   |
| m.i  | Blautia producta [ref_mOTU_v2_4020]                  | 2_FoxP3+ CD31- CD25high CD127low % CD4+      | 0.000222149 | 0.003183853 | 0.56245589   | NA                              | NA                   |
| m.i  | Blautia producta [ref_mOTU_v2_4020]                  | 2_FoxP3+ % CD25high CD127low CD4+            | 0.019666862 | 0.000533085 | 0.487440321  | NA                              | NA                   |
| m.i  | Blautia producta [ref_mOTU_v2_4020]                  | 2_FoxP3+ CD31- % CD25high CD127low CD4+      | 0.000718153 | 0.00012023  | 0.554007049  | NA                              | NA                   |
| m.i  | unknown Prevotella [meta_mOTU_v2_6399]               | 9_Va7.2+ CD161 CD4- CD3+ (ul)                | 0.028432985 | 0.026444608 | -0.419746584 | NA                              | DEPLETED-ENRICHED-NS |
| m.i  | unknown Prevotella [meta_mOTU_v2_6399]               | 9_Va7.2+ CD161 % CD3+                        | 0.030979073 | 0.018487524 | -0.456845425 | NA                              | NA                   |
| m.i  | unknown Prevotella [meta_mOTU_v2_6399]               | 2_FoxP3+ CD45RA- CD25high CD127low % CD4+    | 0.022855041 | 0.000268706 | -0.412004056 | NA                              | NA                   |

Table S7

| Test | Feature1                                     | Feature2                                    | CORONA_Q    | CORONA_LRP  | CORONA_R     | Feature1CORONA   | Feature2CORONA      |
|------|----------------------------------------------|---------------------------------------------|-------------|-------------|--------------|------------------|---------------------|
| m.i  | unknown Clostridiales [meta_mOTU_v2_7093]    | 4_CD56high CD16+ % CD3-                     | 0.010736708 | 0.001152152 | 0.45512038   | DEPLETED-ENRICHE | NA                  |
| m.i  | unknown Clostridiales [meta_mOTU_v2_7093]    | 4_CD56high CD16+ CD3- (ul)                  | 0.005726591 | 0.000656037 | 0.48400936   | DEPLETED-ENRICHE | NA                  |
| m.i  | unknown Clostridiales [meta_mOTU_v2_7093]    | 6_CD161+ CCR6+ CXCR3- CD25+ CD4+ (ul)       | 0.018620144 | 0.000645709 | 0.463182436  | DEPLETED-ENRICHE | DEPLETED-NS-NS      |
| m.i  | unknown Clostridiales [meta_mOTU_v2_7093]    | 6_CD161+ CCR6+ CXCR3- CD25+ % CD4+          | 0.012615074 | 0.000936165 | 0.481816031  | DEPLETED-ENRICHE | NA                  |
| m.i  | unknown Clostridiales [meta_mOTU_v2_7093]    | 1_CD4- CD8+ CD3+ (ul)                       | 0.005182264 | 0.002053446 | 0.512697543  | DEPLETED-ENRICHE | NA                  |
| m.i  | unknown Clostridiales [meta_mOTU_v2_7093]    | 3_HLA-DR-CD4dim/- (ul)                      | 0.013758319 | 0.000915031 | 0.456696052  | DEPLETED-ENRICHE | NA                  |
| m.i  | unknown Clostridiales [meta_mOTU_v2_7093]    | 4_CD56high CD16+ CD3- %                     | 0.010736708 | 0.001152152 | 0.45512038   | DEPLETED-ENRICHE | NA                  |
| m.i  | unknown Ruminococcaceae [meta_mOTU_v2_6652]  | 5_CD24- CD45RO- CD25- CD4+ CD8- CD3+ (ul)   | 0.031171411 | 0.037517993 | 0.458530604  | NA               | NS-ENRICHE-NS       |
| m.i  | Bifidobacterium bifidum [ref_mOTU_v2_0786]   | 5_CD62L- CD45RO- % CD25+ CD4+ CD4high CD8-  | 0.033368263 | 0.012993561 | 0.467750851  | NA               | NA                  |
| m.i  | unknown Burkholderiales [meta_mOTU_v2_7434]  | 5_CD4high CD8dim % CD4+ CD8+                | 0.005685009 | 0.000445649 | -0.504530645 | NA               | NA                  |
| m.i  | unknown Clostridiales [meta_mOTU_v2_5341]    | 2_FoxP3+ CD45RA- % CD25high CD127low CD4+   | 0.02721682  | 0.006667938 | -0.45261282  | NA               | NA                  |
| m.i  | unknown Clostridiales [meta_mOTU_v2_5669]    | 9_IFNg- TNFa+ % Va7.2+ CD161 CD3+           | 0.048419527 | 0.002865041 | 0.456351405  | NA               | NA                  |
| m.i  | unknown Ruminococcus [meta_mOTU_v2_7476]     | 2_CD31+ CD45RA- % CD25high CD127low CD4+    | 0.016600099 | 0.002495749 | 0.491212184  | NA               | NA                  |
| m.i  | unknown Ruminococcus [meta_mOTU_v2_7476]     | 3_CD11c+ % CD14- CD16- HLA-DR+ CD4dim/-     | 0.02263247  | 0.001721828 | 0.468219174  | NA               | ENRICHE-NS-NS       |
| m.i  | unknown Clostridiales [meta_mOTU_v2_5880]    | 1_CD4bright CD8dim CD4+ CD8+ % CD3+         | 0.041344895 | 0.049396563 | -0.431390994 | NA               | NA                  |
| m.i  | unknown Clostridiales [meta_mOTU_v2_5880]    | 5_CD4+ CD8+ %                               | 0.034307388 | 0.039497633 | -0.446786428 | NA               | NA                  |
| m.i  | unknown Oscillibacter [meta_mOTU_v2_5944]    | 4_CD56dim CD16+ CD3- %                      | 0.005771694 | 0.008437742 | 0.490278088  | NA               | NA                  |
| m.i  | unknown Oscillibacter [meta_mOTU_v2_5944]    | 5_CD24- CD45RO- CD8+ CD4- CD3+ (ul)         | 0.000213088 | 0.001890499 | 0.575255178  | NA               | NA                  |
| m.i  | unknown Oscillibacter [meta_mOTU_v2_5944]    | 4_CD56dim CD16+ % CD3-                      | 0.005771694 | 0.008437742 | 0.490278088  | NA               | NA                  |
| m.i  | unknown Oscillibacter [meta_mOTU_v2_5944]    | 8_TNFA- IL-2+ IL-17a+ CD4+ CD3+ (ul)        | 0.042245179 | 0.012380347 | -0.442777553 | NA               | NA                  |
| m.i  | unknown Oscillibacter [meta_mOTU_v2_5944]    | 5_CD62L+ CD45RO- CD8+ CD4- CD3+ (ul)        | 3.73052E-06 | 0.001191434 | 0.63667334   | NA               | DEPLETED-NS-NS      |
| m.i  | unknown Oscillibacter [meta_mOTU_v2_5944]    | 4_CD56dim CD16+ CD3- (ul)                   | 0.002178706 | 0.003071123 | 0.505156003  | NA               | NA                  |
| m.i  | unknown Oscillibacter [meta_mOTU_v2_5944]    | 1_CD19+ %                                   | 0.013771216 | 0.019887302 | -0.440634852 | NA               | DEPLETED-ENRICHE-NS |
| m.i  | unknown Clostridiales [meta_mOTU_v2_7553]    | 5_CD25- CD4+ % CD4high cells                | 0.014638837 | 0.00284964  | -0.493981158 | NA               | ENRICHE-NS-NS       |
| m.i  | unknown Clostridiales [meta_mOTU_v2_7553]    | 5_CD62L- CD45RO+ CD25+ CD4+ CD8- CD3+ (ul)  | 0.033090995 | 0.046753598 | 0.4489966    | NA               | DEPLETED-NS-NS      |
| m.i  | unknown Clostridiales [meta_mOTU_v2_7553]    | 5_CD24- CD45RO+ CD25+ CD4+ % CD4high CD8-   | 0.048960684 | 0.005730755 | 0.425391303  | NA               | NA                  |
| m.i  | Clostridium sp. CAG:448 [meta_mOTU_v2_7377]  | 2_CD39+ CD45RA+ CD25high CD127low CD4+ (ul) | 0.036606011 | 0.000273982 | -0.47322506  | NA               | NA                  |
| m.i  | unknown Clostridiales [meta_mOTU_v2_7014]    | 5_CD62L- CD45RO- CD25- CD4+ % CD4high CD8-  | 0.036905983 | 0.000231665 | 0.426605412  | ENRICHE-DEplete  | ENRICHE-NS-NS       |
| m.i  | unknown Clostridiales [meta_mOTU_v2_7014]    | 5_CD62L- CD45RO- % CD25- CD4+ CD4high CD8-  | 0.036905983 | 0.000411223 | 0.420633856  | ENRICHE-DEplete  | ENRICHE-NS-NS       |
| m.i  | unknown Clostridiales [meta_mOTU_v2_7014]    | 5_CD4high CD8dim % CD4+ CD8+                | 0.03429378  | 0.030693957 | 0.448094902  | ENRICHE-DEplete  | NA                  |
| m.i  | unknown Clostridiales [meta_mOTU_v2_7014]    | 5_CD4_Teff/Treg                             | 0.01111985  | 0.000149381 | 0.477358018  | ENRICHE-DEplete  | ENRICHE-NS-NS       |
| m.i  | Sutterella wadsworthensis [ref_mOTU_v2_4889] | 8_TNFA- IL-5+ IL-17a- % CD3+                | 0.00731062  | 0.010863239 | -0.508854266 | NA               | NA                  |
| m.i  | Sutterella wadsworthensis [ref_mOTU_v2_4889] | 1_CD4dim CD8bright % CD4+ CD8+ CD3+         | 0.01001147  | 0.005677506 | -0.477821108 | NA               | NA                  |
| m.i  | Sutterella wadsworthensis [ref_mOTU_v2_4889] | 5_CD24- CD45RO- % CD8+ CD4-                 | 0.013549106 | 1.31378E-06 | 0.480184958  | NA               | NS-DEPLETED-NS      |
| m.i  | Sutterella wadsworthensis [ref_mOTU_v2_4889] | 8_TNFA- IL-5+ % IL-17a- CD3+                | 0.007325253 | 0.010672348 | -0.508812417 | NA               | NA                  |
| m.i  | Sutterella wadsworthensis [ref_mOTU_v2_4889] | 1_CD4bright CD8dim % CD4+ CD8+ CD3+         | 0.01001147  | 0.003428652 | 0.477821108  | NA               | NA                  |
| m.i  | Sutterella wadsworthensis [ref_mOTU_v2_4889] | 1_CD19+ %                                   | 0.004827875 | 0.000310209 | -0.487848163 | NA               | DEPLETED-ENRICHE-NS |
| m.i  | unknown Clostridiales [meta_mOTU_v2_6629]    | 2_FoxP3+ CD45RA- CD25high CD127low % CD4+   | 5.75297E-05 | 0.026024041 | 0.589321088  | NA               | NA                  |
| m.i  | unknown Clostridiales [meta_mOTU_v2_6629]    | 2_FoxP3+ % CD25high CD127low CD4+           | 0.024216513 | 0.006968709 | 0.449615026  | NA               | NA                  |
| m.i  | unknown Clostridiales [meta_mOTU_v2_6629]    | 2_FoxP3+ CD31- CD25high CD127low % CD4+     | 0.000222149 | 0.0247454   | 0.566797417  | NA               | NA                  |
| m.i  | unknown Clostridiales [meta_mOTU_v2_6629]    | 5_CD62L+ CD45RO+ CD25+ CD4+ % CD4high CD8-  | 0.020656525 | 0.003208632 | 0.453592885  | NA               | NA                  |
| m.i  | unknown Clostridiales [meta_mOTU_v2_6629]    | 2_FoxP3+ CD31- % CD25high CD127low CD4+     | 0.001854933 | 0.001548607 | 0.522740351  | NA               | NA                  |
| m.i  | unknown Clostridiales [meta_mOTU_v2_6629]    | 2_FoxP3+ CD45RA- % CD25high CD127low CD4+   | 0.000651129 | 0.032782135 | 0.521364329  | NA               | NA                  |
| m.i  | Clostridium sp. KLE 1755 [ref_mOTU_v2_0860]  | 2_FoxP3+ CD45RA- CD25high CD127low % CD4+   | 0.00148855  | 0.015655224 | 0.531751915  | NA               | NA                  |
| m.i  | Clostridium sp. KLE 1755 [ref_mOTU_v2_0860]  | 2_FoxP3+ CD45RA- % CD25high CD127low CD4+   | 0.002161215 | 0.002151844 | 0.510290981  | NA               | NA                  |
| m.i  | Clostridium sp. KLE 1755 [ref_mOTU_v2_0860]  | 2_FoxP3+ CD31- % CD25high CD127low CD4+     | 0.033960127 | 0.011434897 | 0.41358311   | NA               | NA                  |
| m.i  | Clostridium sp. KLE 1755 [ref_mOTU_v2_0860]  | 2_FoxP3+ CD31- CD25high CD127low % CD4+     | 0.003982326 | 0.035840517 | 0.488373505  | NA               | NA                  |
| m.i  | Clostridium sp. KLE 1755 [ref_mOTU_v2_0860]  | 2_FoxP3+ % CD25high CD127low CD4+           | 0.025064554 | 0.001408467 | 0.435066379  | NA               | NA                  |
| m.i  | unknown Clostridiales [meta_mOTU_v2_6852]    | 2_FoxP3+ CD45RA- CD25high CD127low % CD4+   | 0.025942212 | 0.001453577 | -0.435737357 | NA               | NA                  |
| m.i  | unknown Clostridiales [meta_mOTU_v2_6852]    | 2_CD25high CD127low % CD4+                  | 0.025942212 | 0.044232664 | -0.430197014 | NA               | NA                  |
| m.i  | unknown Clostridiales [meta_mOTU_v2_6852]    | 2_FoxP3+ CD31- % CD25high CD127low CD4+     | 0.025942212 | 0.006502576 | -0.441224861 | NA               | NA                  |
| m.i  | unknown Clostridiales [meta_mOTU_v2_6852]    | 2_FoxP3+ CD31- CD25high CD127low % CD4+     | 0.017089793 | 0.006751981 | -0.476581915 | NA               | NA                  |
| m.i  | unknown Clostridiales [meta_mOTU_v2_6852]    | 2_FoxP3+ % CD25high CD127low CD4+           | 0.01991541  | 0.000911907 | -0.464014697 | NA               | NA                  |
| m.i  | Eubacterium sp. CAG:274 [meta_mOTU_v2_7140]  | 4_CD56high CD16+ CD3- %                     | 0.010239405 | 0.002131752 | -0.47611579  | ENRICHE-DEplete  | NA                  |

Table S7

| Test | Feature1                                       | Feature2                                     | CORONA_Q    | CORONA_LRP  | CORONA_R     | Feature1CORONA   | Feature2CORONA       |
|------|------------------------------------------------|----------------------------------------------|-------------|-------------|--------------|------------------|----------------------|
| m.i  | Eubacterium sp. CAG:274 [meta_mOTU_v2_7140]    | 4_CD56high CD16+ % CD3-                      | 0.010239405 | 0.002131752 | -0.47611579  | ENRICHED-DEPLETE | NA                   |
| m.i  | Eubacterium sp. CAG:274 [meta_mOTU_v2_7140]    | 4_CD56high CD16+ CD3- (ul)                   | 0.011946452 | 0.010334575 | -0.462871153 | ENRICHED-DEPLETE | NA                   |
| m.i  | unknown Clostridiales [meta_mOTU_v2_7281]      | 5_CD8_Tem/Tn                                 | 0.030662776 | 0.044385453 | 0.460921695  | NA               | NA                   |
| m.i  | unknown Faecalibacterium [meta_mOTU_v2_7718]   | 5_CD24- CD45RO- CD8+ CD4- CD3+ (ul)          | 0.033672007 | 0.003916978 | 0.421784994  | NA               | NA                   |
| m.i  | unknown Ruminococcus [meta_mOTU_v2_7275]       | 9_IFNg+ TNFa- Va7.2+ CD161 % CD3+            | 0.027898511 | 0.023378197 | 0.453272977  | NA               | DEPLETED-NS-NS       |
| m.i  | unknown Ruminococcus [meta_mOTU_v2_7275]       | 9_IFNg+ TNFa- Va7.2+ CD161+ CD4- CD3+ (ul)   | 0.010025914 | 0.009125412 | 0.502174847  | NA               | DEPLETED-NS-NS       |
| m.i  | unknown Bacteroidales [meta_mOTU_v2_6670]      | 8_TNFa+ IL-2+ IL-17a- CD4+ CD3+ (ul)         | 0.048507275 | 0.02067847  | -0.449576464 | NA               | DEPLETED-NS-NS       |
| m.i  | unknown Bacteroidales [meta_mOTU_v2_6670]      | 5_CD62L- CD45RO+ CD8+ CD4- CD3+ (ul)         | 0.024032082 | 0.038923886 | 0.420795796  | NA               | DEPLETED-ENRICHED-NS |
| m.i  | unknown Bacteroidales [meta_mOTU_v2_6670]      | 2_FoxP3+ CD31- % CD25high CD127low CD4+      | 0.03254797  | 0.021549942 | -0.400136182 | NA               | NA                   |
| m.i  | unknown Bacteroidales [meta_mOTU_v2_6670]      | 5_CD24- CD45RO+ CD8+ CD4- CD3+ (ul)          | 0.040208252 | 0.044031133 | 0.417730841  | NA               | DEPLETED-NS-NS       |
| m.i  | unknown Bacteroidales [meta_mOTU_v2_6670]      | 9_IL-17a- TNFa- % Va7.2+ CD161 CD3+          | 0.044762418 | 0.004832849 | 0.468484333  | NA               | NA                   |
| m.i  | unknown Bacteroidales [meta_mOTU_v2_6670]      | 2_FoxP3+ CD39- CD25high CD127low CD4+ (ul)   | 0.034045918 | 0.033805186 | -0.450714256 | NA               | NA                   |
| m.i  | unknown Bacteroidales [meta_mOTU_v2_6670]      | 8_TNFa+ IL-5+ IL-17a- % CD3+                 | 0.035460443 | 0.013897468 | -0.462297479 | NA               | DEPLETED-NS-NS       |
| m.i  | unknown Bacteroidales [meta_mOTU_v2_6670]      | 2_FoxP3+ CD31- CD25high CD127low CD4+ (ul)   | 0.034244168 | 0.021615547 | -0.443238485 | NA               | DEPLETED-NS-NS       |
| m.i  | unknown Bacteroidales [meta_mOTU_v2_6670]      | 8_TNFa+ IL-2- IL-17a- CD4+ CD3+ (ul)         | 0.048907144 | 0.023993933 | -0.416160987 | NA               | DEPLETED-NS-NS       |
| m.i  | unknown Bacteroidales [meta_mOTU_v2_6670]      | 6_CD27- % CD161+ CCR6+ CXCR3- CD25- CD4+     | 0.036110183 | 0.015076145 | -0.431753406 | NA               | NA                   |
| m.i  | unknown Bacteroidales [meta_mOTU_v2_6670]      | 8_TNFa+ IL-5+ IL-17a- CD4+ CD3+ (ul)         | 0.041289977 | 0.021704504 | -0.435896302 | NA               | DEPLETED-ENRICHED-NS |
| m.i  | unknown Bacteroidales [meta_mOTU_v2_6670]      | 8_TNFa- IL-2- % IL-17a- CD3+                 | 0.021108185 | 0.012069907 | 0.475779821  | NA               | ENRICHED-NS-NS       |
| m.i  | unknown Bacteroidales [meta_mOTU_v2_6670]      | 8_TNFa+ IL-2- % IL-17a- CD3+                 | 0.035748829 | 0.015919432 | -0.454593352 | NA               | DEPLETED-NS-DEPLETED |
| m.i  | unknown Bacteroidales [meta_mOTU_v2_6670]      | 8_TNFa- IL-2- IL-17a- % CD3+                 | 0.022505525 | 0.013229093 | 0.468352798  | NA               | ENRICHED-NS-NS       |
| m.i  | unknown Bacteroidales [meta_mOTU_v2_6670]      | 2_FoxP3+ CD45RA- CD25high CD127low CD4+ (ul) | 0.018114315 | 0.02343015  | -0.441294784 | NA               | DEPLETED-NS-NS       |
| m.i  | unknown Bacteroidales [meta_mOTU_v2_6670]      | 8_TNFa+ IL-5- IL-17a- % CD3+                 | 0.032996895 | 0.01480707  | -0.457355159 | NA               | DEPLETED-NS-DEPLETED |
| m.i  | unknown Bacteroidales [meta_mOTU_v2_6670]      | 9_IL-17a- TNFa+ % Va7.2+ CD161 CD3+          | 0.041311723 | 0.00458656  | -0.470383348 | NA               | NA                   |
| m.i  | unknown Bacteroidales [meta_mOTU_v2_6670]      | 8_TNFa+ IL-2- IL-17a- % CD3+                 | 0.033245949 | 0.015897721 | -0.4545892   | NA               | DEPLETED-NS-DEPLETED |
| m.i  | unknown Bacteroidales [meta_mOTU_v2_6670]      | 8_TNFa+ IL-5- % IL-17a- CD3+                 | 0.032996895 | 0.01480707  | -0.457355159 | NA               | DEPLETED-NS-DEPLETED |
| m.i  | unknown Bacteroidales [meta_mOTU_v2_6670]      | 8_TNFa+ IL-5+ % IL-17a- CD3+                 | 0.034365175 | 0.013916686 | -0.462310148 | NA               | DEPLETED-NS-NS       |
| m.i  | unknown Bacteroidales [meta_mOTU_v2_6670]      | 2_CD25high CD127low CD4+ (ul)                | 0.039717698 | 0.018424823 | -0.444359851 | NA               | DEPLETED-NS-NS       |
| m.i  | unknown Bacteroidales [meta_mOTU_v2_6670]      | 8_TNFa+ IL-5- IL-17a- CD4+ CD3+ (ul)         | 0.045119665 | 0.024690116 | -0.418403636 | NA               | DEPLETED-NS-NS       |
| m.i  | Streptococcus oralis [ref_mOTU_v2_0356]        | 8_TNFa+ IL-5+ IL-17a- % CD3+                 | 0.035460443 | 0.003066697 | -0.441992901 | NA               | DEPLETED-NS-NS       |
| m.i  | Streptococcus oralis [ref_mOTU_v2_0356]        | 8_TNFa+ IL-5+ % IL-17a- CD3+                 | 0.034365175 | 0.002910696 | -0.442920024 | NA               | DEPLETED-NS-NS       |
| m.i  | Streptococcus oralis [ref_mOTU_v2_0356]        | 8_TNFa- IL-2- IL-17a- % CD3+                 | 0.03708408  | 0.007649058 | 0.429654476  | NA               | ENRICHED-NS-NS       |
| m.i  | Streptococcus oralis [ref_mOTU_v2_0356]        | 8_TNFa- IL-2- % IL-17a- CD3+                 | 0.037611101 | 0.027190622 | 0.420194941  | NA               | ENRICHED-NS-NS       |
| m.i  | Streptococcus oralis [ref_mOTU_v2_0356]        | 8_TNFa+ IL-5+ IL-17a- CD4+ CD3+ (ul)         | 0.044114137 | 0.003102626 | -0.423265713 | NA               | DEPLETED-ENRICHED-NS |
| m.i  | unknown Clostridiales [meta_mOTU_v2_7097]      | 5_CD25- CD4+ % CD4high cells                 | 0.016981836 | 0.048740624 | -0.474973045 | NA               | ENRICHED-NS-NS       |
| m.i  | unknown Clostridiales [meta_mOTU_v2_7097]      | 5_CD62L- CD45RO+ CD25+ CD4+ CD8- CD3+ (ul)   | 0.005232254 | 0.022586146 | 0.514450569  | NA               | DEPLETED-NS-NS       |
| m.i  | unknown Clostridiales [meta_mOTU_v2_7097]      | 2_FoxP3+ CD45RA- % CD25high CD127low CD4+    | 0.031222609 | 0.013677796 | 0.375548303  | NA               | NA                   |
| m.i  | unknown Clostridiales [meta_mOTU_v2_6787]      | 9_IL-17a- IFNg+ Va7.2+ CD161+ CD4- CD3+ (ul) | 0.009459589 | 0.004766772 | 0.48457225   | NA               | DEPLETED-NS-NS       |
| m.i  | unknown Clostridiales [meta_mOTU_v2_6787]      | 9_IFNg+ TNFa+ Va7.2+ CD161+ CD4- CD3+ (ul)   | 0.033761797 | 0.004096614 | 0.448490061  | NA               | DEPLETED-NS-NS       |
| m.i  | unknown Clostridiales [meta_mOTU_v2_6787]      | 9_IL2- TNFa+ Va7.2+ CD161+ CD4- CD3+ (ul)    | 0.017334257 | 0.029955667 | 0.466439083  | NA               | DEPLETED-NS-NS       |
| m.i  | unknown Clostridiales [meta_mOTU_v2_6787]      | 9_IL-17a- TNFa+ Va7.2+ CD161+ CD4- CD3+ (ul) | 0.018669162 | 0.008896575 | 0.456098327  | NA               | DEPLETED-NS-NS       |
| m.i  | Ruminococcus callidus [ref_mOTU_v2_4209]       | 5_CD24- CD45RO+ % CD25+ CD4+ CD4high CD8-    | 0.047677233 | 0.012860474 | -0.466983088 | NA               | NA                   |
| m.i  | Ruminococcus callidus [ref_mOTU_v2_4209]       | 5_CD24- CD45RO+ CD25+ CD4+ % CD4high CD8-    | 0.012942798 | 0.039559268 | -0.496669976 | NA               | NA                   |
| m.i  | Ruminococcus callidus [ref_mOTU_v2_4209]       | 5_CD24+ CD45RO+ % CD25- CD4+ CD4high CD8-    | 0.018194151 | 0.018659038 | 0.489177625  | NA               | NA                   |
| m.i  | Ruminococcus callidus [ref_mOTU_v2_4209]       | 5_CD24+ CD45RO- % CD25- CD4+ CD4high CD8-    | 0.007275013 | 0.004099691 | 0.508956425  | NA               | NA                   |
| m.i  | Ruminococcus callidus [ref_mOTU_v2_4209]       | 5_CD24+ CD45RO- CD25- CD4+ % CD4high CD8-    | 0.006635781 | 0.003918048 | 0.51087462   | NA               | NA                   |
| m.i  | Ruminococcus callidus [ref_mOTU_v2_4209]       | 5_CD24+ CD45RO+ CD25- CD4+ % CD4high CD8-    | 0.014777483 | 0.018094705 | 0.493774387  | NA               | NA                   |
| m.i  | Ruminococcus callidus [ref_mOTU_v2_4209]       | 5_CD24+ CD45RO+ CD25- CD4+ CD8- CD3+ (ul)    | 0.005855031 | 0.009871271 | 0.513466859  | NA               | NA                   |
| m.i  | Ruminococcus callidus [ref_mOTU_v2_4209]       | 5_CD24+ CD45RO- CD25- CD4+ CD8- CD3+ (ul)    | 0.004652743 | 0.001938823 | 0.509522129  | NA               | NA                   |
| m.i  | Prevotella sp. CAG:279 [meta_mOTU_v2_6938]     | 1_CD4+ CD8- %                                | 0.018500768 | 0.006806939 | -0.488805399 | NA               | DEPLETED-ENRICHED-NS |
| m.i  | Veillonella atypica [ref_mOTU_v2_0561]         | 0_IL-17a- IFNg+ % TCRgd+ CD3+                | 0.041655727 | 0.000267106 | -0.453387433 | NA               | NA                   |
| m.i  | unknown Massiliomicrobiota [meta_mOTU_v2_7010] | 5_CD24+ CD45RO- % CD8+ CD4-                  | 0.012502093 | 0.007871558 | 0.487358361  | NA               | NS-ENRICHED-NS       |
| m.i  | Ruminococcus bromii [ref_mOTU_v2_4720]         | 3_CD11c+ % CD14- CD16- HLA-DR+ CD4dim/-      | 0.009932912 | 0.00346669  | 0.502373956  | NA               | ENRICHED-NS-NS       |
| m.i  | unknown Olsenella [meta_mOTU_v2_7724]          | 9_IL-17a+ TNFa- % Va7.2+ CD161 CD3+          | 0.020399367 | 8.86346E-05 | 0.486620827  | NA               | NA                   |
| m.i  | unknown Olsenella [meta_mOTU_v2_7724]          | 9_IL-17a+ TNFa- Va7.2+ CD161 % CD3+          | 0.042857192 | 0.000190619 | 0.469515339  | NA               | NA                   |

Table S7

| Test | Feature1                                                                                          | Feature2                                        | CORONA_Q    | CORONA_LRP  | CORONA_R     | Feature1CORONA    | Feature2CORONA       |
|------|---------------------------------------------------------------------------------------------------|-------------------------------------------------|-------------|-------------|--------------|-------------------|----------------------|
| m.i  | unknown Olsenella [meta_mOTU_v2_7724]                                                             | 9_IL-17a+ TNFa- Va7.2+ CD161+ CD4- CD3+ (ul)    | 0.01961808  | 9.2213E-05  | 0.487495901  | NA                | NA                   |
| m.i  | uncultured Clostridium sp. [meta_mOTU_v2_5907]                                                    | 4_CD56high CD16+ CD3- (ul)                      | 0.039801683 | 0.047943718 | 0.398892955  | NA                | NA                   |
| m.i  | uncultured Clostridium sp. [meta_mOTU_v2_5907]                                                    | 5_CD24+ CD45RO- CD25- CD4+ CD8- CD3+ (ul)       | 0.010572562 | 0.012174763 | 0.476561028  | NA                | NA                   |
| m.i  | Bacteroides xylanisolvens [ref_mOTU_v2_1072]                                                      | 1_CD4- CD8+ CD3+ (ul)                           | 0.047142529 | 0.026806048 | -0.40562714  | NA                | NA                   |
| m.i  | Bacteroides xylanisolvens [ref_mOTU_v2_1072]                                                      | 4_CD8+ CD4- % CD56+ CD3+                        | 0.009269969 | 0.04102414  | -0.503845831 | NA                | NA                   |
| m.i  | unknown Alistipes [meta_mOTU_v2_6070]                                                             | 5_CD4_Teff/2_Treg                               | 0.020438309 | 0.012621524 | 0.463323862  | NA                | NA                   |
| m.i  | unknown Alistipes [meta_mOTU_v2_6070]                                                             | 5_CD62L+ CD45RO+ CD25+ CD4+ % CD4high CD8-      | 0.020656525 | 0.009577382 | -0.470659679 | NA                | NA                   |
| m.i  | unknown Alistipes [meta_mOTU_v2_6070]                                                             | 5_CD4_Teff/Treg                                 | 0.012930458 | 0.017139078 | 0.482803173  | NA                | ENRICHED-NS-NS       |
| m.i  | Alloscardovia omnicoles [ref_mOTU_v2_0446]                                                        | 2_FoxP3+ CD31- % CD25high CD127low CD4+         | 0.03254797  | 0.019221298 | -0.398805963 | NA                | NA                   |
| m.i  | Bacteroides clarus [ref_mOTU_v2_4945]                                                             | 5_CD24- CD45RO- CD8+ CD4- CD3+ (ul)             | 0.02433657  | 0.030718965 | 0.440725706  | NA                | NA                   |
| m.i  | Bacteroides clarus [ref_mOTU_v2_4945]                                                             | 5_CD62L- CD45RO- CD8+ CD4- CD3+ (ul)            | 0.014689629 | 0.042540668 | 0.493905198  | NA                | NA                   |
| m.i  | Dialister invisus [ref_mOTU_v2_4598]                                                              | 4_CD56high CD16+ % CD3-                         | 0.019557266 | 0.045572091 | -0.431426412 | DEPLETED-ENRICHED | NA                   |
| m.i  | Dialister invisus [ref_mOTU_v2_4598]                                                              | 4_CD56high CD16+ CD3- %                         | 0.019557266 | 0.045572091 | -0.431426412 | DEPLETED-ENRICHED | NA                   |
| m.i  | unknown Clostridiales [meta_mOTU_v2_5741]                                                         | 8_IL-10- IL-2- % IL-17a- CD3+                   | 0.045593372 | 0.049641745 | 0.431572769  | NA                | NA                   |
| m.i  | Sutterella sp. CAG:351 [meta_mOTU_v2_7305]                                                        | 5_CD62L- CD45RO+ CD25- CD4+ % CD4high CD8-      | 0.032205396 | 0.017242195 | 0.445701418  | NA                | NA                   |
| m.i  | Sutterella sp. CAG:351 [meta_mOTU_v2_7305]                                                        | 2_FoxP3+ CD45RA- CD25high CD127low CD4+ (ul)    | 0.035799408 | 0.046495183 | -0.403990685 | NA                | DEPLETED-NS-NS       |
| m.i  | Sutterella sp. CAG:351 [meta_mOTU_v2_7305]                                                        | 5_CD24- CD45RO+ % CD25- CD4+ CD4high CD8-       | 0.014923664 | 0.014312526 | 0.456117645  | NA                | NA                   |
| m.i  | Sutterella sp. CAG:351 [meta_mOTU_v2_7305]                                                        | 5_CD4_Tem/Tn                                    | 0.014406728 | 0.021103204 | 0.459846779  | NA                | NA                   |
| m.i  | Sutterella sp. CAG:351 [meta_mOTU_v2_7305]                                                        | 5_CD24- CD45RO- CD25- CD4+ CD8- CD3+ (ul)       | 0.031558767 | 0.029449385 | -0.437092382 | NA                | NS-ENRICHED-NS       |
| m.i  | Sutterella sp. CAG:351 [meta_mOTU_v2_7305]                                                        | 5_CD4_Teff/Treg                                 | 0.047757486 | 0.042700682 | -0.373998886 | NA                | ENRICHED-NS-NS       |
| m.i  | Sutterella sp. CAG:351 [meta_mOTU_v2_7305]                                                        | 3_CD14hi CD16- HLA-DR+ CD16+/HLA-DR- CD16- (ul) | 0.045893283 | 0.01156009  | -0.467891434 | NA                | NA                   |
| m.i  | Sutterella sp. CAG:351 [meta_mOTU_v2_7305]                                                        | 5_CD62L+ CD45RO- % CD25- CD4+ CD4high CD8-      | 0.022729006 | 0.030834046 | -0.436876098 | NA                | NA                   |
| m.i  | Sutterella sp. CAG:351 [meta_mOTU_v2_7305]                                                        | 2_FoxP3+ CD31- CD25high CD127low % CD4+         | 0.041774591 | 0.0463792   | -0.395116174 | NA                | NA                   |
| m.i  | Sutterella sp. CAG:351 [meta_mOTU_v2_7305]                                                        | 5_CD62L+ CD45RO- CD25- CD4+ % CD4high CD8-      | 0.020493843 | 0.028923656 | -0.439575357 | NA                | NA                   |
| m.i  | Sutterella sp. CAG:351 [meta_mOTU_v2_7305]                                                        | 3_CD14- CD16- HLA-DR+ CD4dim/- (ul)             | 0.049232411 | 0.010805914 | -0.449202689 | NA                | NS-ENRICHED-NS       |
| m.i  | Sutterella sp. CAG:351 [meta_mOTU_v2_7305]                                                        | 5_CD62L- CD45RO+ % CD25- CD4+ CD4high CD8-      | 0.034237036 | 0.014447587 | 0.45370042   | NA                | NA                   |
| m.i  | Sutterella sp. CAG:351 [meta_mOTU_v2_7305]                                                        | 5_CD24- CD45RO+ CD25- CD4+ % CD4high CD8-       | 0.028063161 | 0.019408536 | 0.435388925  | NA                | NS-DEPLETED-DEPLETED |
| m.i  | Sutterella sp. CAG:351 [meta_mOTU_v2_7305]                                                        | 3_HLA-DR+ CD16+/HLA-DR- CD16- (ul)              | 0.039913155 | 0.02672924  | -0.430887718 | NA                | NA                   |
| m.i  | Sutterella sp. CAG:351 [meta_mOTU_v2_7305]                                                        | 2_FoxP3+ CD31- CD25high CD127low CD4+ (ul)      | 0.044125969 | 0.035058231 | -0.411989761 | NA                | DEPLETED-NS-NS       |
| m.i  | Sutterella sp. CAG:351 [meta_mOTU_v2_7305]                                                        | 5_CD62L+ CD45RO- CD25- CD4+ CD8- CD3+ (ul)      | 0.023499731 | 0.024146326 | -0.44471739  | NA                | DEPLETED-ENRICHED-NS |
| m.i  | unknown Clostridiales [meta_mOTU_v2_7415]                                                         | 1_CD19+ %                                       | 0.017824196 | 0.027858116 | -0.479318659 | NA                | DEPLETED-ENRICHED-NS |
| m.i  | Faecalitalea cylindroides [ref_mOTU_v2_1470]                                                      | 4_CD56high CD16+ CD3- (ul)                      | 0.026517939 | 0.021545488 | -0.446696855 | NA                | NA                   |
| m.i  | cand. Alistipes marseilloanorexicus [ref_mOTU_v2_25_9_IL-17a- IFNg- Va7.2+ CD161+ CD4- CD3+ (ul)] | 9_IL-17a- IFNg- Va7.2+ CD161+ CD4- CD3+ (ul)    | 0.029593182 | 0.021356379 | 0.417762631  | NA                | DEPLETED-ENRICHED-NS |
| m.i  | cand. Alistipes marseilloanorexicus [ref_mOTU_v2_25_9_IFNg- TNFa- Va7.2+ CD161+ CD4- CD3+ (ul)]   | 9_IFNg- TNFa- Va7.2+ CD161+ CD4- CD3+ (ul)      | 0.04512869  | 0.039019109 | 0.403096037  | NA                | DEPLETED-ENRICHED-NS |
| m.i  | cand. Alistipes marseilloanorexicus [ref_mOTU_v2_25_1_CD11c+ CD14+ % CD3- CD19-                   | 1_CD11c+ CD14+ % CD3- CD19-                     | 0.021338848 | 0.007599349 | -0.485608934 | NA                | NA                   |
| m.i  | cand. Alistipes marseilloanorexicus [ref_mOTU_v2_25_9_Va7.2+ CD161 CD4- CD3+ (ul)]                | 9_Va7.2+ CD161 CD4- CD3+ (ul)                   | 0.028432985 | 0.005759262 | 0.422370451  | NA                | DEPLETED-ENRICHED-NS |
| m.i  | Roseburia sp. CAG:182 [meta_mOTU_v2_6334]                                                         | 4_CD56high CD16+ CD3- (ul)                      | 0.002889398 | 0.000633564 | 0.518572253  | NA                | NA                   |
| m.i  | Roseburia sp. CAG:182 [meta_mOTU_v2_6334]                                                         | 4_CD56high CD16+ % CD3-                         | 0.006466619 | 0.000417591 | 0.481558587  | NA                | NA                   |
| m.i  | Roseburia sp. CAG:182 [meta_mOTU_v2_6334]                                                         | 4_CD56high CD16+ CD3- %                         | 0.006466619 | 0.000417591 | 0.481558587  | NA                | NA                   |
| m.i  | Eubacterium sp. CAG:202 [meta_mOTU_v2_7449]                                                       | 6_CD27bright CXCR3+ CD25- % CD4+                | 0.033512096 | 0.028084418 | -0.436554968 | NA                | NA                   |
| m.i  | Eubacterium sp. CAG:202 [meta_mOTU_v2_7449]                                                       | 6_CD161+ CCR6- CXCR3- CD25- CD4+ (ul)           | 0.024853424 | 0.033697414 | 0.448960875  | NA                | NA                   |
| m.i  | Eubacterium sp. CAG:202 [meta_mOTU_v2_7449]                                                       | 0_IL-17a+ IFNg- TCRgd+ % CD3+                   | 0.004298693 | 0.001599047 | -0.519776165 | NA                | NA                   |
| m.i  | Eubacterium sp. CAG:202 [meta_mOTU_v2_7449]                                                       | 6_CD161+ CCR6- CXCR3- % CD25- CD4+              | 0.008621529 | 0.048805642 | 0.490370543  | NA                | NA                   |
| m.i  | Eubacterium sp. CAG:202 [meta_mOTU_v2_7449]                                                       | 0_IL-17a+ IL-22- TCRgd+ % CD3+                  | 0.039214786 | 0.006201808 | -0.471610498 | NA                | NA                   |
| m.i  | Eubacterium sp. CAG:202 [meta_mOTU_v2_7449]                                                       | 6_CD27bright % CXCR3+ CD25- CD4+                | 0.001192514 | 0.049289907 | -0.544682195 | NA                | NA                   |
| m.i  | Eubacterium sp. CAG:202 [meta_mOTU_v2_7449]                                                       | 6_CD27bright CXCR3+ % CD25- CD4+                | 0.036880707 | 0.028101646 | -0.432988622 | NA                | NA                   |
| m.i  | Faecalibacterium prausnitzii [ref_mOTU_v2_4211]                                                   | 1_CD4dim CD8bright CD4+ CD8+ % CD3+             | 0.000637316 | 0.003075251 | -0.556162332 | NA                | NA                   |
| m.i  | Faecalibacterium prausnitzii [ref_mOTU_v2_4211]                                                   | 1_CD4dim CD8bright CD4+ CD8+ CD3+ %             | 0.004198574 | 0.004434855 | -0.520252228 | NA                | NA                   |
| m.i  | Faecalibacterium prausnitzii [ref_mOTU_v2_4211]                                                   | 5_CD4high CD8dim % CD4+ CD8+                    | 0.004487906 | 0.000249994 | 0.518732938  | NA                | NA                   |
| m.i  | Ruminococcus sp. CAG:177 [meta_mOTU_v2_6664]                                                      | 6_CD27bright CXCR3+ % CD25- CD4+                | 0.003895845 | 0.001565423 | -0.507517789 | NA                | NA                   |
| m.i  | Ruminococcus sp. CAG:177 [meta_mOTU_v2_6664]                                                      | 6_CD161+ CCR6- CXCR3- CD25- % CD4+              | 0.027130491 | 0.000471171 | 0.441024644  | NA                | NA                   |
| m.i  | Ruminococcus sp. CAG:177 [meta_mOTU_v2_6664]                                                      | 6_CD161+ CCR6- % CXCR3- CD25- CD4+              | 0.023826917 | 0.000242603 | 0.444363825  | NA                | NA                   |
| m.i  | Ruminococcus sp. CAG:177 [meta_mOTU_v2_6664]                                                      | 5_CD4_Teff/Treg                                 | 0.013590619 | 0.042860458 | 0.44711606   | NA                | ENRICHED-NS-NS       |
| m.i  | Ruminococcus sp. CAG:177 [meta_mOTU_v2_6664]                                                      | 6_CD27bright CXCR3+ CD25- CD4+ (ul)             | 0.015119919 | 0.027280571 | -0.479283562 | NA                | NA                   |

Table S7

| Test | Feature1                                        | Feature2                                    | CORONA_Q    | CORONA_LRP  | CORONA_R     | Feature1CORONA                  | Feature2CORONA       |
|------|-------------------------------------------------|---------------------------------------------|-------------|-------------|--------------|---------------------------------|----------------------|
| m.i  | Ruminococcus sp. CAG:177 [meta_mOTU_v2_6664]    | 6_CD27bright CXCR3+ CD25- % CD4+            | 0.004900569 | 0.002394353 | -0.50265907  | NA                              | NA                   |
| m.i  | Ruminococcus sp. CAG:177 [meta_mOTU_v2_6664]    | 6_CD161- CCR6+ CXCR3- % CD25+ CD4+          | 0.040888802 | 0.000577924 | -0.45420202  | NA                              | NA                   |
| m.i  | Ruminococcus sp. CAG:177 [meta_mOTU_v2_6664]    | 6_CD161+ CCR6- CXCR3- % CD25- CD4+          | 0.026806918 | 0.000292527 | 0.447046714  | NA                              | NA                   |
| m.i  | Ruminococcus sp. CAG:177 [meta_mOTU_v2_6664]    | 2_FoxP3- CD45RA+ % CD25high CD127low CD4+   | 0.01954072  | 0.009655694 | 0.471690576  | NA                              | NA                   |
| m.i  | unknown Butyricicoccus [meta_mOTU_v2_5800]      | 6_CD27bright CXCR3+ CD25- % CD4+            | 0.033512096 | 0.003664402 | -0.42654613  | NA                              | NA                   |
| m.i  | unknown Butyricicoccus [meta_mOTU_v2_5800]      | 5_CD24- CD45RO+ CD25+ CD4+ % CD4high CD8-   | 0.039620135 | 0.011058099 | -0.436978732 | NA                              | NA                   |
| m.i  | unknown Butyricicoccus [meta_mOTU_v2_5800]      | 5_CD25- CD4+ % CD4high cells                | 0.037391612 | 0.013926248 | 0.445900243  | NA                              | ENRICHED-NS-NS       |
| m.i  | unknown Butyricicoccus [meta_mOTU_v2_5800]      | 6_CD27bright CXCR3+ % CD25- CD4+            | 0.036880707 | 0.002578514 | -0.436051727 | NA                              | NA                   |
| m.i  | unknown Butyricicoccus [meta_mOTU_v2_5800]      | 2_FoxP3+ CD45RA- % CD25high CD127low CD4+   | 0.019852634 | 0.011114664 | -0.446612914 | NA                              | NA                   |
| m.i  | Alistipes obesi [ref_mOTU_v2_1825]              | 5_CD24- CD45RO+ CD25- CD4+ % CD4high CD8-   | 0.043602974 | 0.012179794 | -0.415637538 | NS-ENRICHED-NS                  | NS-DEPLETED-DEPLETED |
| m.i  | Alistipes obesi [ref_mOTU_v2_1825]              | 5_CD24- CD45RO+ % CD25- CD4+ CD4high CD8-   | 0.042349738 | 0.023092922 | -0.406136468 | NS-ENRICHED-NS                  | NA                   |
| m.i  | Alistipes obesi [ref_mOTU_v2_1825]              | 6_CD161- CCR6+ CXCR3- % CD25+ CD4+          | 0.040888802 | 8.10807E-05 | -0.453849434 | NS-ENRICHED-NS                  | NA                   |
| m.i  | unknown Clostridiales [meta_mOTU_v2_7778]       | 8_TNFa- IL-5+ IL-17a+ % CD3+                | 0.027069002 | 0.008528088 | -0.480209647 | NA                              | NA                   |
| m.i  | unknown Clostridiales [meta_mOTU_v2_7778]       | 5_CD24- CD45RO- CD8+ CD4- CD3+ (ul)         | 0.039313562 | 0.03081635  | 0.374191051  | NA                              | NA                   |
| m.i  | Roseburia hominis [ref_mOTU_v2_4572]            | 5_CD62L- CD45RO- % CD25- CD4+ CD4high CD8-  | 0.032371799 | 0.044301619 | 0.430794427  | ENRICHED-DEplete ENRICHED-NS-NS | ENRICHED-NS-NS       |
| m.i  | Roseburia hominis [ref_mOTU_v2_4572]            | 5_CD62L- CD45RO- CD25- CD4+ % CD4high CD8-  | 0.031710434 | 0.031502996 | 0.432083497  | ENRICHED-DEplete ENRICHED-NS-NS | ENRICHED-NS-NS       |
| m.i  | Roseburia hominis [ref_mOTU_v2_4572]            | 8_TNFa- IL-2+ IL-17a+ CD4+ CD3+ (ul)        | 0.042245179 | 0.013773105 | -0.45625855  | ENRICHED-DEplete NA             | NA                   |
| m.i  | unknown Firmicutes [meta_mOTU_v2_7454]          | 6_CD161+ CCR6- % CXCR3- CD25- CD4+          | 0.029194701 | 0.028231874 | 0.420577126  | NA                              | NA                   |
| m.i  | unknown Firmicutes [meta_mOTU_v2_7454]          | 8_GM-CSF+ IL-2- % IL-17a- CD3+              | 0.023918532 | 0.025793473 | -0.435537608 | NA                              | DEPLETED-ENRICHED-NS |
| m.i  | unknown Firmicutes [meta_mOTU_v2_7454]          | 8_GM-CSF+ IL-2- IL-17a- CD4+ CD3+ (ul)      | 0.043999438 | 0.04083643  | -0.406346245 | NA                              | DEPLETED-ENRICHED-NS |
| m.i  | unknown Firmicutes [meta_mOTU_v2_7454]          | 2_CD39+ CD45RA- CD25high CD127low CD4+ (ul) | 0.04608756  | 0.033821904 | -0.410757244 | NA                              | DEPLETED-NS-NS       |
| m.i  | unknown Firmicutes [meta_mOTU_v2_7454]          | 4_CD56dim CD16+ CD3- (ul)                   | 0.018475585 | 0.034639865 | 0.422008012  | NA                              | NA                   |
| m.i  | unknown Firmicutes [meta_mOTU_v2_7454]          | 2_FoxP3+ CD39+ % CD25high CD127low CD4+     | 0.024821944 | 0.022057236 | -0.448992843 | NA                              | NA                   |
| m.i  | unknown Firmicutes [meta_mOTU_v2_7454]          | 6_CD161+ CCR6- CXCR3- CD25- % CD4+          | 0.033300046 | 0.028401096 | 0.415436912  | NA                              | NA                   |
| m.i  | unknown Firmicutes [meta_mOTU_v2_7454]          | 8_GM-CSF+ IL-2- IL-17a- % CD3+              | 0.023922152 | 0.025678264 | -0.435533629 | NA                              | DEPLETED-ENRICHED-NS |
| m.i  | unknown Firmicutes [meta_mOTU_v2_7454]          | 2_FoxP3+ CD45RA- % CD25high CD127low CD4+   | 0.023797001 | 0.043427503 | -0.389475876 | NA                              | NA                   |
| m.i  | unknown Firmicutes [meta_mOTU_v2_7454]          | 2_CD39+ CD45RA- % CD25high CD127low CD4+    | 0.029299744 | 0.040547699 | -0.430157478 | NA                              | NA                   |
| m.i  | unknown Firmicutes [meta_mOTU_v2_7454]          | 6_CD161+ CCR6- CXCR3- % CD25- CD4+          | 0.036351656 | 0.027185988 | 0.419418306  | NA                              | NA                   |
| m.i  | unknown Firmicutes [meta_mOTU_v2_7454]          | 2_FoxP3+ CD39+ CD25high CD127low CD4+ (ul)  | 0.043746878 | 0.031483748 | -0.412233701 | NA                              | NA                   |
| m.i  | unknown Firmicutes [meta_mOTU_v2_7454]          | 6_CD161+ CCR6- CXCR3- CD25- CD4+ (ul)       | 0.037716652 | 0.029192345 | 0.405972455  | NA                              | NA                   |
| m.i  | unknown Firmicutes [meta_mOTU_v2_7454]          | 2_FoxP3+ CD39+ CD25high CD127low % CD4+     | 0.026645474 | 0.024149504 | -0.437054126 | NA                              | NA                   |
| m.i  | unknown Firmicutes [meta_mOTU_v2_7454]          | 2_CD39+ CD31- CD25high CD127low % CD4+      | 0.043880033 | 0.02970212  | -0.428350277 | NA                              | NA                   |
| m.i  | unknown Firmicutes [meta_mOTU_v2_7454]          | 2_CD39+ CD45RA- CD25high CD127low % CD4+    | 0.033767734 | 0.0316661   | -0.430484113 | NA                              | NA                   |
| m.i  | unknown Firmicutes [meta_mOTU_v2_7454]          | 2_CD39+ CD31- % CD25high CD127low CD4+      | 0.038961377 | 0.029770322 | -0.431530871 | NA                              | NA                   |
| m.i  | Tyzzereella nexilis [ref_mOTU_v2_4366]          | 5_CD62L+ CD45RO+ CD25- CD4+ % CD4high CD8-  | 0.01747039  | 0.023508028 | 0.463484016  | NA                              | NA                   |
| m.i  | Tyzzereella nexilis [ref_mOTU_v2_4366]          | 6_CD27bright CXCR3+ CD25- % CD4+            | 0.046048426 | 0.032357449 | 0.405033463  | NA                              | NA                   |
| m.i  | Tyzzereella nexilis [ref_mOTU_v2_4366]          | 6_CD27bright CXCR3+ % CD25- CD4+            | 0.04884451  | 0.034439498 | 0.400787226  | NA                              | NA                   |
| m.i  | Tyzzereella nexilis [ref_mOTU_v2_4366]          | 5_CD62+- CD45RO+ % CD25- CD4+ CD4high CD8-  | 0.01747039  | 0.028717122 | 0.466642463  | NA                              | NA                   |
| m.i  | Alistipes inops [ref_mOTU_v2_3597]              | 9_IL2- TNFa+ Va7.2+ CD161 % CD3+            | 0.009372993 | 0.007627292 | 0.499364017  | NA                              | NA                   |
| m.i  | Alistipes inops [ref_mOTU_v2_3597]              | 9_IL2- TNFa+ Va7.2+ CD161+ CD4- CD3+ (ul)   | 0.038217249 | 0.027923445 | 0.433479235  | NA                              | DEPLETED-NS-NS       |
| m.i  | unknown Clostridiales [meta_mOTU_v2_7076]       | 0_IL-17a- IL-22- % TCRgd+ CD3+              | 0.021409787 | 0.044160882 | 0.448459271  | NA                              | NA                   |
| m.i  | unknown Clostridiales [meta_mOTU_v2_7076]       | 5_CD4_Tcm/Tn                                | 0.028249212 | 0.005506846 | -0.410693463 | NA                              | NA                   |
| m.i  | unknown Clostridiales [meta_mOTU_v2_7076]       | 0_IL-17a+ IFNg- % TCRgd+ CD3+               | 0.001167991 | 0.032749207 | -0.545069851 | NA                              | NA                   |
| m.i  | unknown Clostridiales [meta_mOTU_v2_7076]       | 0_IL-17a+ IL-22- % TCRgd+ CD3+              | 0.002722964 | 0.011109766 | -0.528873909 | NA                              | NA                   |
| m.i  | Prevotella copri [ref_mOTU_v2_4448]             | 2_FoxP3+ CD31- % CD25high CD127low CD4+     | 0.013300302 | 0.009954373 | -0.458041349 | NA                              | NA                   |
| m.i  | Prevotella copri [ref_mOTU_v2_4448]             | 2_FoxP3+ % CD25high CD127low CD4+           | 0.025064554 | 0.016809652 | -0.431201274 | NA                              | NA                   |
| m.i  | Prevotella copri [ref_mOTU_v2_4448]             | 2_FoxP3+ CD45RA- % CD25high CD127low CD4+   | 0.000476956 | 0.006277409 | -0.553146578 | NA                              | NA                   |
| m.i  | Prevotella copri [ref_mOTU_v2_4448]             | 2_FoxP3+ CD45RA- CD25high CD127low % CD4+   | 0.010460697 | 0.004983468 | -0.47561967  | NA                              | NA                   |
| m.i  | unknown Clostridiales [meta_mOTU_v2_7066]       | 2_FoxP3+ CD45RA- % CD25high CD127low CD4+   | 0.041479481 | 0.04042441  | -0.353201201 | NA                              | NA                   |
| m.i  | unknown Clostridiales [meta_mOTU_v2_5754]       | 6_CD161+ CCR6- CXCR3- CD25- CD4+ (ul)       | 0.021735604 | 0.03681848  | 0.459426668  | NA                              | NA                   |
| m.i  | Faecalibacterium prausnitzii [ref_mOTU_v2_4875] | 5_CD24- CD45RO+ CD25- CD4+ % CD4high CD8-   | 0.005852426 | 0.001476648 | -0.49884857  | NS-ENRICHED-NS                  | NS-DEPLETED-DEPLETED |
| m.i  | Faecalibacterium prausnitzii [ref_mOTU_v2_4875] | 5_CD24- CD45RO+ % CD25- CD4+ CD4high CD8-   | 0.007876021 | 0.007425483 | -0.476717439 | NS-ENRICHED-NS                  | NA                   |
| m.i  | Bacteroides fragilis [ref_mOTU_v2_0286]         | 6_CD161- CCR6- CXCR3- CD25+ % CD4+          | 0.040893635 | 0.029135763 | 0.45603759   | NA                              | NA                   |
| m.i  | Alistipes onderdonkii [ref_mOTU_v2_0775]        | 4_CD56high CD16+ CD3-                       | 0.000488953 | 3.86664E-05 | -0.560891611 | NA                              | NA                   |



Table S7

| Test | Feature1                                     | Feature2                                   | CORONA_Q    | CORONA_LRP  | CORONA_R     | Feature1CORONA | Feature2CORONA       |
|------|----------------------------------------------|--------------------------------------------|-------------|-------------|--------------|----------------|----------------------|
| m.i  | Alistipes onderdonkii [ref_mOTU_v2_0775]     | 4_CD8+ CD4+ CD56+ CD3+ %                   | 0.00068006  | 0.041527425 | -0.554992599 | NA             | NA                   |
| m.i  | Alistipes onderdonkii [ref_mOTU_v2_0775]     | 0_IL-17a- IFNg+ TCRgd+ %CD3+               | 0.044963589 | 0.039853944 | 0.452239906  | NA             | NA                   |
| m.i  | Alistipes onderdonkii [ref_mOTU_v2_0775]     | 4_CD56high CD16+ CD3- (ul)                 | 0.002152181 | 0.000216306 | -0.533460112 | NA             | NA                   |
| m.i  | Alistipes onderdonkii [ref_mOTU_v2_0775]     | 4_CD56high CD16+ % CD3-                    | 0.000488953 | 3.86664E-05 | -0.560891611 | NA             | NA                   |
| m.i  | Coprococcus comes [ref_mOTU_v2_4313]         | 5_CD62L+ CD45RO+ CD25- CD4+ % CD4high CD8- | 0.002030467 | 0.010621294 | -0.520924343 | DEPLETED-NS-NS | NA                   |
| m.i  | Coprococcus comes [ref_mOTU_v2_4313]         | 5_CD8_Tem/Tcm                              | 0.008715242 | 0.009586631 | 0.468418815  | DEPLETED-NS-NS | NA                   |
| m.i  | Coprococcus comes [ref_mOTU_v2_4313]         | 5_CD62+ CD45RO+ % CD25- CD4+ CD4high CD8-  | 0.002517698 | 0.014594241 | -0.516562    | DEPLETED-NS-NS | NA                   |
| m.i  | Parabacteroides johnsonii [ref_mOTU_v2_5296] | 5_CD62L- CD45RO- CD25+ CD4+ CD8- CD3+ (ul) | 0.018103836 | 0.003526859 | -0.489288377 | NA             | DEPLETED-ENRICHED-NS |
| m.i  | Parabacteroides johnsonii [ref_mOTU_v2_5296] | 5_CD62L+ CD45RO- % CD25- CD4+ CD4high CD8- | 0.007562796 | 0.023404749 | -0.477655208 | NA             | NA                   |
| m.i  | Parabacteroides johnsonii [ref_mOTU_v2_5296] | 5_CD24- CD45RO- CD25+ CD4+ CD8- CD3+ (ul)  | 0.008878483 | 0.011740591 | -0.504761846 | NA             | DEPLETED-ENRICHED-NS |
| m.i  | Parabacteroides johnsonii [ref_mOTU_v2_5296] | 5_CD4_Tem/Tn                               | 0.022333835 | 0.014647045 | 0.444112768  | NA             | NA                   |
| m.i  | Parabacteroides johnsonii [ref_mOTU_v2_5296] | 5_CD62L- CD45RO- CD25+ CD4+ % CD4high CD8- | 0.011113647 | 0.001678572 | -0.499965918 | NA             | NA                   |
| m.i  | Parabacteroides johnsonii [ref_mOTU_v2_5296] | 5_CD62L- CD45RO+ CD25- CD4+ % CD4high CD8- | 0.032205396 | 0.009702966 | 0.45847322   | NA             | NA                   |
| m.i  | Parabacteroides johnsonii [ref_mOTU_v2_5296] | 5_CD62L+ CD45RO- CD25+ CD4+ % CD4high CD8- | 0.046764962 | 0.028997422 | -0.467443587 | NA             | NA                   |
| m.i  | Parabacteroides johnsonii [ref_mOTU_v2_5296] | 5_CD24- CD45RO- CD25+ CD4+ % CD4high CD8-  | 0.008223526 | 0.014351812 | -0.506382174 | NA             | DEPLETED-NS-NS       |
| m.i  | Parabacteroides johnsonii [ref_mOTU_v2_5296] | 5_CD62L+ CD45RO- CD25- CD4+ CD8- CD3+ (ul) | 0.023499731 | 0.017090397 | -0.448972177 | NA             | DEPLETED-ENRICHED-NS |
| m.i  | Parabacteroides johnsonii [ref_mOTU_v2_5296] | 5_CD24- CD45RO- % CD25+ CD4+ CD4high CD8-  | 0.014629737 | 0.046836855 | -0.493994793 | NA             | NA                   |
| m.i  | Parabacteroides johnsonii [ref_mOTU_v2_5296] | 5_CD62L- CD45RO+ % CD25- CD4+ CD4high CD8- | 0.034237036 | 0.016653067 | 0.44077881   | NA             | NA                   |
| m.i  | Parabacteroides johnsonii [ref_mOTU_v2_5296] | 5_CD4+ CD25+ %                             | 0.011392374 | 0.002176611 | -0.499432406 | NA             | DEPLETED-NS-NS       |
| m.i  | Parabacteroides johnsonii [ref_mOTU_v2_5296] | 5_CD62L+ CD45RO- CD25- CD4+ % CD4high CD8- | 0.008179221 | 0.030211929 | -0.470621912 | NA             | NA                   |
| m.i  | Parabacteroides johnsonii [ref_mOTU_v2_5296] | 5_CD62L- CD45RO- % CD25+ CD4+ CD4high CD8- | 0.033368263 | 0.010538158 | -0.458859943 | NA             | NA                   |
| m.i  | Veillonella dispar [ref_mOTU_v2_4469]        | 8_TNFa+ IL-2- IL-17a+ CD4+ CD3+ (ul)       | 0.049839631 | 0.002078794 | -0.465923325 | NA             | DEPLETED-ENRICHED-NS |
| m.i  | Veillonella dispar [ref_mOTU_v2_4469]        | 8_TNFa+ IL-5- IL-17a+ CD4+ CD3+ (ul)       | 0.018728154 | 0.000790948 | -0.488533046 | NA             | DEPLETED-ENRICHED-NS |
| m.i  | Veillonella dispar [ref_mOTU_v2_4469]        | 8_TNFa+ IL-5- IL-17a+ % CD3+               | 0.011090579 | 0.000112598 | -0.500010631 | NA             | NA                   |
| m.i  | Veillonella dispar [ref_mOTU_v2_4469]        | 9_IL-2+ TNFa+ % Va7.2+ CD161 CD3+          | 0.021283097 | 0.000540447 | -0.469676537 | NA             | NA                   |
| m.i  | Desulfovibrio piger [ref_mOTU_v2_4205]       | 8_TNFa- IL-5- IL-17a- CD4+ CD3+ (ul)       | 0.023496161 | 0.041244556 | 0.47291317   | NA             | NS-ENRICHED-NS       |
| m.i  | Desulfovibrio piger [ref_mOTU_v2_4205]       | 5_CD24- CD45RO- CD8+ CD4- CD3+ (ul)        | 0.045149216 | 0.00291278  | 0.3902388    | NA             | NA                   |
| m.i  | unknown Clostridiales [meta_mOTU_v2_6013]    | 2_FoxP3+ CD45RA- % CD25high CD127low CD4+  | 0.029323551 | 0.026261063 | -0.421943552 | NA             | NA                   |
| m.i  | unknown Clostridiales [meta_mOTU_v2_6013]    | 5_CD4_Teff/2_Treg                          | 0.023639867 | 0.013550651 | 0.45308201   | NA             | NA                   |
| m.i  | unknown Clostridiales [meta_mOTU_v2_6013]    | 2_FoxP3+ CD45RA- CD25high CD127low % CD4+  | 0.018608234 | 0.013398009 | -0.446769984 | NA             | NA                   |
| m.i  | unknown Prevotella [meta_mOTU_v2_6968]       | 5_CD24- CD45RO- CD8+ CD4- CD3+ (ul)        | 0.026128027 | 0.001349057 | 0.415700353  | NA             | NA                   |
| m.i  | unknown Prevotella [meta_mOTU_v2_6968]       | 5_CD24+ CD45RO- % CD8+ CD4-                | 0.042303403 | 0.035495805 | -0.377627867 | NA             | NS-ENRICHED-NS       |
| m.i  | unknown Prevotella [meta_mOTU_v2_6968]       | 1_CD19+ %                                  | 0.026128027 | 0.000444942 | -0.442346002 | NA             | DEPLETED-ENRICHED-NS |
| m.i  | unknown Prevotella [meta_mOTU_v2_6968]       | 5_CD62L- CD45RO- CD8+ CD4- CD3+ (ul)       | 0.043604885 | 0.028989082 | 0.421552998  | NA             | NA                   |
| m.i  | unknown Clostridiales [meta_mOTU_v2_7717]    | 5_CD24+ CD45RO- % CD25- CD4+ CD4high CD8-  | 0.023609186 | 0.004071069 | 0.4574013    | NA             | NA                   |
| m.i  | unknown Clostridiales [meta_mOTU_v2_7717]    | 5_CD24+ CD45RO- CD25- CD4+ % CD4high CD8-  | 0.022932499 | 0.00418626  | 0.458115092  | NA             | NA                   |
| m.i  | unknown Clostridiales [meta_mOTU_v2_7717]    | 4_CD56dim CD16+ % CD3-                     | 0.030370051 | 0.01959371  | 0.38922917   | NA             | NA                   |
| m.i  | unknown Clostridiales [meta_mOTU_v2_7717]    | 4_CD56dim CD16+ CD3- (ul)                  | 0.004486005 | 0.008023397 | 0.481515733  | NA             | NA                   |
| m.i  | unknown Clostridiales [meta_mOTU_v2_7717]    | 5_CD24+ CD45RO+ CD25- CD4+ CD8- CD3+ (ul)  | 0.027577387 | 0.005570801 | 0.463489127  | NA             | NA                   |
| m.i  | unknown Clostridiales [meta_mOTU_v2_7717]    | 5_CD24+ CD45RO- CD25- CD4+ CD8- CD3+ (ul)  | 0.004652743 | 0.000834467 | 0.503764522  | NA             | NA                   |
| m.i  | unknown Clostridiales [meta_mOTU_v2_7717]    | 5_CD24+ CD45RO- % CD25+ CD4+ CD4high CD8-  | 0.047736331 | 0.006683654 | 0.450933987  | NA             | NA                   |
| m.i  | unknown Clostridiales [meta_mOTU_v2_7717]    | 2_FoxP3+ CD45RA- % CD25high CD127low CD4+  | 0.009778487 | 0.019610114 | -0.432095698 | NA             | NA                   |
| m.i  | unknown Clostridiales [meta_mOTU_v2_7717]    | 6_CD161+ CCR6+ CXCR3- % CD25+ CD4+         | 0.008583832 | 0.000662885 | 0.505476493  | NA             | NA                   |
| m.i  | unknown Clostridiales [meta_mOTU_v2_7717]    | 4_CD56high CD16+ CD3- (ul)                 | 0.036570862 | 0.023237543 | 0.40472349   | NA             | NA                   |
| m.i  | unknown Clostridiales [meta_mOTU_v2_7717]    | 5_CD24- CD45RO- CD8+ CD4- CD3+ (ul)        | 0.028544061 | 0.002566934 | 0.393687373  | NA             | NA                   |
| m.i  | unknown Clostridiales [meta_mOTU_v2_7717]    | 5_CD24+ CD45RO+ CD8+ CD4- CD3+ (ul)        | 0.020661725 | 0.011749639 | 0.467048812  | NA             | NS-ENRICHED-ENRICHED |
| m.i  | unknown Clostridiales [meta_mOTU_v2_7717]    | 5_CD4_Teff/Treg                            | 0.043084938 | 0.014272048 | 0.396002297  | NA             | ENRICHED-NS-NS       |
| m.i  | unknown Clostridiales [meta_mOTU_v2_7717]    | 6_CD161+ CCR6+ CXCR3- CD25+ CD4+ (ul)      | 0.018620144 | 0.008171877 | 0.470009811  | NA             | DEPLETED-NS-NS       |
| m.i  | unknown Clostridiales [meta_mOTU_v2_7717]    | 4_CD56dim CD16+ CD3- %                     | 0.030370051 | 0.01959371  | 0.38922917   | NA             | NA                   |
| m.i  | unknown Clostridiales [meta_mOTU_v2_7717]    | 6_CD161+ CCR6+ % CXCR3- CD25+ CD4+         | 0.029317593 | 0.00151847  | 0.47837772   | NA             | NA                   |
| m.i  | unknown Clostridiales [meta_mOTU_v2_7717]    | 6_CD161+ CCR6+ CXCR3- CD25+ % CD4+         | 0.02188425  | 0.007062593 | 0.4592602    | NA             | NA                   |
| m.i  | unknown Ruminococcaceae [meta_mOTU_v2_6850]  | 5_CD62L- CD45RO- CD8+ CD4- CD3+ (ul)       | 0.040790518 | 0.04539127  | 0.453909218  | NA             | NA                   |
| m.i  | unknown Ruminococcaceae [meta_mOTU_v2_6850]  | 4_CD56high CD16+ CD3- (ul)                 | 0.013725669 | 0.020908811 | 0.485261221  | NA             | NA                   |
| m.i  | unknown Ruminococcaceae [meta_mOTU_v2_6850]  | 5_CD24- CD45RO- CD8+ CD4- CD3+ (ul)        | 0.014831904 | 0.015030638 | 0.467407998  | NA             | NA                   |

Table S7

| Test | Feature1                                         | Feature2                                     | CORONA_Q    | CORONA_LRP  | CORONA_R     | Feature1CORONA | Feature2CORONA       |
|------|--------------------------------------------------|----------------------------------------------|-------------|-------------|--------------|----------------|----------------------|
| m.i  | unknown Clostridiales [meta_mOTU_v2_7782]        | 5_CD4_Tcm/Tn                                 | 0.034021401 | 0.037555727 | -0.460264391 | NA             | NA                   |
| m.i  | unknown Clostridiales [meta_mOTU_v2_7782]        | 4_CD56high CD16+ CD3- (ul)                   | 0.045218508 | 0.045479782 | 0.392214211  | NA             | NA                   |
| m.i  | unknown Clostridiales [meta_mOTU_v2_6699]        | 4_CD56+ CD3+ %                               | 1.49106E-06 | 0.000207912 | -0.648924049 | NA             | NA                   |
| m.i  | unknown Clostridiales [meta_mOTU_v2_6699]        | 4_CD8+ CD4- CD56+ CD3+ %                     | 4.23254E-06 | 0.006146625 | -0.63494325  | NA             | NA                   |
| m.i  | unknown Ruminococcaceae [meta_mOTU_v2_7012]      | 5_CD4_Tcm/Tn                                 | 0.040978095 | 0.043660523 | -0.417851173 | NA             | NA                   |
| m.i  | Lactobacillus ruminis [ref_mOTU_v2_0167]         | 5_CD24+ CD45RO- % CD8+ CD4-                  | 0.049442495 | 0.006202269 | -0.379497513 | NA             | NS-ENRICHED-NS       |
| m.i  | Lactobacillus ruminis [ref_mOTU_v2_0167]         | 4_CD56high CD16+ % CD3-                      | 0.035761097 | 0.006568987 | 0.409419827  | NA             | NA                   |
| m.i  | Lactobacillus ruminis [ref_mOTU_v2_0167]         | 4_CD56high CD16+ CD3- %                      | 0.035761097 | 0.006568987 | 0.409419827  | NA             | NA                   |
| m.i  | Acidaminococcus intestini [ref_mOTU_v2_0391]     | 5_CD24- CD45RO- CD25- CD4+ % CD4high CD8-    | 0.020820793 | 0.021080855 | 0.443147342  | NA             | NA                   |
| m.i  | Acidaminococcus intestini [ref_mOTU_v2_0391]     | 5_CD24- CD45RO- % CD8+ CD4-                  | 0.049001016 | 0.045433588 | 0.40740774   | NA             | NS-DEPLETED-NS       |
| m.i  | Acidaminococcus intestini [ref_mOTU_v2_0391]     | 5_CD24- CD45RO- CD8+ CD4- CD3+ (ul)          | 0.041210097 | 0.044124288 | 0.370724133  | NA             | NA                   |
| m.i  | Acidaminococcus intestini [ref_mOTU_v2_0391]     | 5_CD4_Tcm/Tn                                 | 0.030179317 | 0.019027074 | -0.416919873 | NA             | NA                   |
| m.i  | Acidaminococcus intestini [ref_mOTU_v2_0391]     | 5_CD62L+ CD45RO- % CD25+ CD4+ CD4high CD8-   | 0.016330375 | 0.009681717 | 0.475881934  | NA             | NA                   |
| m.i  | Acidaminococcus intestini [ref_mOTU_v2_0391]     | 5_CD24- CD45RO- % CD25- CD4+ CD4high         | 0.019932829 | 0.02167306  | 0.444264702  | NA             | NA                   |
| m.i  | Acidaminococcus intestini [ref_mOTU_v2_0391]     | 5_CD24- CD45RO- % CD25+ CD4+ CD4high CD8-    | 0.025153436 | 0.012291499 | 0.46569994   | NA             | NA                   |
| m.i  | Acidaminococcus intestini [ref_mOTU_v2_0391]     | 5_CD8_Tcm/Tn                                 | 0.028058129 | 0.017810701 | -0.435393643 | NA             | NA                   |
| m.i  | unknown Ruminococcaceae [meta_mOTU_v2_6478]      | 5_CD24+ CD45RO- % CD8+ CD4-                  | 0.001821695 | 0.023489522 | -0.536670072 | NA             | NS-ENRICHED-NS       |
| m.i  | unknown Ruminococcaceae [meta_mOTU_v2_6478]      | 8_TNFa- IL-2+ IL-17a+ CD4+ CD3+ (ul)         | 0.042245179 | 0.004958445 | -0.452650013 | NA             | NA                   |
| m.i  | unknown Erysipelotrichaceae [meta_mOTU_v2_7790]  | 3_HLA-DR-CD4dim/- (ul)                       | 0.003828125 | 0.005516119 | 0.52211129   | NA             | NA                   |
| m.i  | unknown Erysipelotrichaceae [meta_mOTU_v2_7790]  | 6_CD27bright % CXCR3+ CD25- CD4+             | 0.022068722 | 0.005023748 | -0.46881798  | NA             | NA                   |
| m.i  | unknown Erysipelotrichaceae [meta_mOTU_v2_7790]  | 6_CD27bright CXCR3+ % CD25- CD4+             | 0.003895845 | 0.001034299 | -0.520164835 | NA             | NA                   |
| m.i  | unknown Erysipelotrichaceae [meta_mOTU_v2_7790]  | 2_FoxP3+ CD45RA- % CD25high CD127low CD4+    | 0.000667697 | 0.017502633 | -0.544898628 | NA             | NA                   |
| m.i  | unknown Erysipelotrichaceae [meta_mOTU_v2_7790]  | 2_FoxP3+ CD45RA+ CD25high CD127low % CD4+    | 0.006898251 | 0.036409029 | -0.449690631 | NA             | NA                   |
| m.i  | unknown Erysipelotrichaceae [meta_mOTU_v2_7790]  | 6_CD27bright CXCR3+ CD25- % CD4+             | 0.002995042 | 0.001017072 | -0.526997892 | NA             | NA                   |
| m.i  | unknown Erysipelotrichaceae [meta_mOTU_v2_7790]  | 5_CD24+ CD45RO+ CD8+ CD4- CD3+ (ul)          | 0.01820392  | 0.023505395 | 0.489165675  | NA             | NS-ENRICHED-ENRICHED |
| m.i  | unknown Erysipelotrichaceae [meta_mOTU_v2_7790]  | 6_CD27bright CXCR3+ CD25- CD4+ (ul)          | 0.015119919 | 0.007730718 | -0.477663864 | NA             | NA                   |
| m.i  | Faecalibacterium prausnitzii [meta_mOTU_v2_7154] | 2_FoxP3- CD45RA+ CD25high CD127low % CD4+    | 0.007287912 | 0.022743405 | 0.508919363  | NA             | NA                   |
| m.i  | Faecalibacterium prausnitzii [meta_mOTU_v2_7154] | 6_CD161- CCR6- CXCR3- % CD25+ CD4+           | 0.02365553  | 0.048370715 | -0.467166937 | NA             | NA                   |
| m.i  | Faecalibacterium prausnitzii [meta_mOTU_v2_7154] | 5_CD4_Teff/Treg                              | 0.013590619 | 0.01537572  | 0.443946992  | NA             | ENRICHED-NS-NS       |
| m.i  | Faecalibacterium prausnitzii [meta_mOTU_v2_7154] | 6_CD161- CCR6- % CXCR3- CD25+ CD4+           | 0.037146141 | 0.042757044 | -0.471273897 | NA             | NA                   |
| m.i  | Faecalibacterium prausnitzii [meta_mOTU_v2_7154] | 5_CD62L- CD45RO- CD25- CD4+ % CD4high CD8-   | 0.029722951 | 0.011927481 | 0.424751427  | NA             | ENRICHED-NS-NS       |
| m.i  | Faecalibacterium prausnitzii [meta_mOTU_v2_7154] | 5_CD62L- CD45RO- % CD25- CD4+ CD4high CD8-   | 0.037638233 | 0.01506065  | 0.413504084  | NA             | ENRICHED-NS-NS       |
| m.i  | unknown Clostridiales [meta_mOTU_v2_5540]        | 5_CD24+ CD45RO- % CD25+ CD4+ CD4high CD8-    | 0.047736331 | 0.013258114 | 0.436142526  | NA             | NA                   |
| m.i  | unknown Eggerthellaceae [meta_mOTU_v2_5373]      | 1_CD19+ %                                    | 0.019871916 | 0.017772397 | -0.476812518 | NA             | DEPLETED-ENRICHED-NS |
| m.i  | Streptococcus parasanguinis [ref_mOTU_v2_0144]   | 9_IL-17a- TNFa+ Va7.2+ CD161+ CD4- CD3+ (ul) | 0.031118139 | 0.008287736 | -0.449254622 | NA             | DEPLETED-NS-NS       |
| m.i  | Bifidobacterium longum [ref_mOTU_v2_0150]        | 5_CD4_Teff/2_Treg                            | 0.019340418 | 0.012341468 | 0.487158139  | NA             | NA                   |
| m.i  | Dialister invisus [meta_mOTU_v2_6402]            | 6_CD27- % CXCR3+ CD25- CD4+                  | 0.029348869 | 0.029023556 | 0.478353171  | NA             | NA                   |
| m.i  | Dialister invisus [meta_mOTU_v2_6402]            | 5_CD24+ CD45RO- % CD8+ CD4-                  | 0.046269579 | 0.040121844 | -0.368283059 | NA             | NS-ENRICHED-NS       |
| m.i  | Dialister invisus [meta_mOTU_v2_6402]            | 5_CD24- CD45RO- CD8+ CD4- CD3+ (ul)          | 0.017347653 | 0.025247041 | 0.423358766  | NA             | NA                   |
| m.i  | Dialister invisus [meta_mOTU_v2_6402]            | 4_CD56high CD16+ CD3- (ul)                   | 0.043594004 | 0.003317471 | 0.386033066  | NA             | NA                   |
| m.i  | Dialister invisus [meta_mOTU_v2_6402]            | 6_CD27- CD161+ CCR6+ CXCR3- CD25- CD4+ (ul)  | 0.020192703 | 0.033664769 | 0.470918149  | NA             | NA                   |
| m.i  | Dialister invisus [meta_mOTU_v2_6402]            | 4_CD56high CD16+ % CD3-                      | 0.006466619 | 0.000342901 | 0.476596678  | NA             | NA                   |
| m.i  | Dialister invisus [meta_mOTU_v2_6402]            | 6_CD27- CD25- CD4+ (ul)                      | 0.012488669 | 0.017919255 | 0.497445678  | NA             | NA                   |
| m.i  | Dialister invisus [meta_mOTU_v2_6402]            | 5_CD24- CD45RO- % CD8+ CD4-                  | 0.026406759 | 0.002620701 | 0.446490196  | NA             | NS-DEPLETED-NS       |
| m.i  | Dialister invisus [meta_mOTU_v2_6402]            | 4_CD56high CD16+ CD3- %                      | 0.006466619 | 0.000342901 | 0.476596678  | NA             | NA                   |
| m.i  | Dialister invisus [meta_mOTU_v2_6402]            | 1_CD19+ %                                    | 0.004673161 | 0.003603977 | -0.4949277   | NA             | DEPLETED-ENRICHED-NS |
| m.i  | Dialister invisus [meta_mOTU_v2_6402]            | 4_CD56high CD16- CD3- (ul)                   | 0.023125622 | 0.000980949 | 0.457909415  | NA             | NA                   |
| m.i  | Dialister invisus [meta_mOTU_v2_6402]            | 3_CD11c+ CD14- CD16- HLA-DR+ CD4dim/- %      | 0.049884327 | 0.017308844 | -0.44244855  | NA             | ENRICHED-NS-NS       |
| m.i  | Dialister invisus [meta_mOTU_v2_6402]            | 6_CD27- CXCR3+ CD25- CD4+ (ul)               | 0.02962023  | 0.018145854 | 0.461761374  | NA             | NA                   |
| m.i  | Dialister invisus [meta_mOTU_v2_6402]            | 6_CD27dim % CXCR3+ CD25- CD4+                | 0.027085719 | 0.018050778 | -0.463375895 | NA             | NA                   |
| m.i  | unknown Butyrivococcus [meta_mOTU_v2_5437]       | 2_FoxP3+ % CD25high CD127low CD4+            | 0.038318879 | 0.022446894 | 0.423154776  | NA             | NA                   |
| m.i  | unknown Butyrivococcus [meta_mOTU_v2_5437]       | 2_FoxP3+ CD31- % CD25high CD127low CD4+      | 0.018995177 | 0.008248021 | 0.47785473   | NA             | NA                   |
| m.i  | Bacteroides stercoris [ref_mOTU_v2_0275]         | 6_CD27dim CXCR3+ CD25- CD4+ (ul)             | 0.034492586 | 0.00389113  | -0.474613289 | NA             | NA                   |
| m.i  | Bacteroides stercoris [ref_mOTU_v2_0275]         | 6_CD27dim % CXCR3+ CD25- CD4+                | 0.016333036 | 0.039428712 | -0.491570723 | NA             | NA                   |

Table S7

| Test | Feature1                                                      | Feature2                                     | CORONA_Q    | CORONA_LRP  | CORONA_R     | Feature1CORONA       | Feature2CORONA       |
|------|---------------------------------------------------------------|----------------------------------------------|-------------|-------------|--------------|----------------------|----------------------|
| m.i  | unknown Bacteroidales [meta_mOTU_v2_5375]                     | 8_IL-10- IL-2+ % IL-17a+ CD3+                | 0.045424968 | 0.019546359 | 0.451225046  | NA                   | NA                   |
| m.i  | unknown Bacteroidales [meta_mOTU_v2_5375]                     | 8_GM-CSF- IL-2+ IL-17a- % CD3+               | 0.04428925  | 0.014340592 | 0.428100619  | NA                   | NA                   |
| m.i  | unknown Bacteroidales [meta_mOTU_v2_5375]                     | 8_GM-CSF- IL-2- IL-17a- % CD3+               | 0.032875146 | 0.0328901   | -0.436021276 | NA                   | NA                   |
| m.i  | unknown Bacteroidales [meta_mOTU_v2_5375]                     | 8_GM-CSF- IL-2+ % IL-17a- CD3+               | 0.044295688 | 0.014840742 | 0.428096709  | NA                   | NA                   |
| m.i  | unknown Clostridiales [meta_mOTU_v2_7355]                     | 4_CD56high CD16+ CD3- (ul)                   | 0.008972902 | 0.007122639 | 0.462835955  | NA                   | NA                   |
| m.i  | Clostridium asparagiforme [ref_mOTU_v2_4394]                  | 2_FoxP3+ CD31- % CD25high CD127low CD4+      | 0.022868309 | 0.004797808 | 0.460676136  | ENRICHED-NS-NS       | NA                   |
| m.i  | Clostridium asparagiforme [ref_mOTU_v2_4394]                  | 2_FoxP3+ CD45RA- % CD25high CD127low CD4+    | 0.022868309 | 0.009056498 | 0.456925434  | ENRICHED-NS-NS       | NA                   |
| m.i  | unknown Clostridiales [meta_mOTU_v2_6986]                     | 8_IL-10+ IL-2- IL-17a- % CD3+                | 0.012201858 | 0.037440593 | -0.473225338 | NA                   | NA                   |
| m.i  | unknown Clostridiales [meta_mOTU_v2_6986]                     | 8_IL-10+ IL-2- % IL-17a- CD3+                | 0.012549144 | 0.035790818 | -0.473958911 | NA                   | NA                   |
| m.i  | unknown Clostridiales [meta_mOTU_v2_6105]                     | 2_FoxP3+ CD31- CD25high CD127low % CD4+      | 0.025080698 | 0.038213318 | 0.444242856  | NA                   | NA                   |
| m.i  | unknown Clostridiales [meta_mOTU_v2_6105]                     | 2_CD25high CD127low % CD4+                   | 0.025080698 | 0.031662637 | 0.436992822  | NA                   | NA                   |
| m.i  | unknown Clostridiales [meta_mOTU_v2_6105]                     | 2_FoxP3+ CD45RA- CD25high CD127low % CD4+    | 0.025080698 | 0.010952999 | 0.455673459  | NA                   | NA                   |
| m.i  | unknown Peptostreptococcaceae [meta_mOTU_v2_7355]             | 5_CD62L- CD45RO+ CD8+ CD4- CD3+ (ul)         | 0.022637798 | 0.01812956  | 0.440991442  | NA                   | DEPLETED-ENRICHED-NS |
| m.i  | Bilophila wadsworthia [ref_mOTU_v2_1149]                      | 4_CD56high CD16+ % CD3-                      | 0.025974465 | 0.040773357 | -0.418769628 | NA                   | NA                   |
| m.i  | Bilophila wadsworthia [ref_mOTU_v2_1149]                      | 4_CD56high CD16+ CD3- %                      | 0.025974465 | 0.040773357 | -0.418769628 | NA                   | NA                   |
| m.i  | Bifidobacterium catenulatum/kashiwanohense [ref_mOTU_v2_6105] | 6_CD27dim % CD25- CD4+                       | 0.01344367  | 0.004152141 | -0.470949906 | NA                   | NA                   |
| m.i  | Bifidobacterium catenulatum/kashiwanohense [ref_mOTU_v2_6105] | 6_CD27dim CD25- % CD4+                       | 0.014933497 | 0.003383437 | -0.475295442 | NA                   | NA                   |
| m.i  | Bifidobacterium catenulatum/kashiwanohense [ref_mOTU_v2_6105] | 5_CD62L+ CD45RO+ % CD8+ CD4-                 | 0.000228436 | 0.049715113 | -0.574078158 | NA                   | NA                   |
| m.i  | Bifidobacterium catenulatum/kashiwanohense [ref_mOTU_v2_6105] | 0_IL-17a- IL-22+ % TCRgd+ CD3+               | 0.022161909 | 0.013570304 | -0.451839108 | NA                   | NA                   |
| m.i  | Bacteroides plebeius [ref_mOTU_v2_4343]                       | 6_CD161+ CCR6- CXCR3- CD25+ CD4+ (ul)        | 0.018925901 | 0.000388435 | -0.45877424  | NA                   | DEPLETED-ENRICHED-NS |
| m.i  | Bacteroides plebeius [ref_mOTU_v2_4343]                       | 6_CD161+ CCR6- CXCR3- CD25+ % CD4+           | 0.015062947 | 0.00034999  | -0.477750958 | NA                   | NA                   |
| m.i  | Bacteroides plebeius [ref_mOTU_v2_4343]                       | 6_CD161+ CCR6- CXCR3- % CD25+ CD4+           | 0.03352072  | 0.000338959 | -0.467593206 | NA                   | NA                   |
| m.i  | Bacteroides plebeius [ref_mOTU_v2_4343]                       | 6_CD161+ CCR6- % CXCR3- CD25+ CD4+           | 0.017183191 | 0.000220863 | -0.481911221 | NA                   | NA                   |
| m.i  | Intestinibacter bartlettii [ref_mOTU_v2_4268]                 | 9_IFNg- TNFa+ % Va7.2+ CD161 CD3+            | 0.048419527 | 0.002268755 | -0.449622043 | NA                   | NA                   |
| m.i  | Oscillibacter sp. 57_20 [meta_mOTU_v2_5351]                   | 5_CD24- CD45RO+ % CD25- CD4+ CD4high CD8-    | 0.007876021 | 0.021483041 | -0.485321548 | NS-ENRICHED-NS       | NA                   |
| m.i  | Oscillibacter sp. 57_20 [meta_mOTU_v2_5351]                   | 5_CD24- CD45RO+ CD25- CD4+ % CD4high CD8-    | 0.008528825 | 0.014165065 | -0.474869383 | NS-ENRICHED-NS       | NS-DEPLETED-DEPLETED |
| m.i  | unknown Atopobiaceae [meta_mOTU_v2_6458]                      | 4_CD56dim CD16+ % CD3-                       | 0.001049997 | 0.000136687 | 0.547049077  | NA                   | NA                   |
| m.i  | unknown Atopobiaceae [meta_mOTU_v2_6458]                      | 5_CD62L+ CD45RO- CD8+ CD4- CD3+ (ul)         | 0.01979264  | 0.024541337 | 0.444445282  | NA                   | DEPLETED-NS-NS       |
| m.i  | unknown Atopobiaceae [meta_mOTU_v2_6458]                      | 5_CD24+ CD45RO- % CD25+ CD4+ CD4high CD8-    | 0.047736331 | 0.008368209 | 0.448196748  | NA                   | NA                   |
| m.i  | unknown Atopobiaceae [meta_mOTU_v2_6458]                      | 4_CD56dim CD16+ CD3- (ul)                    | 0.001270609 | 7.94654E-05 | 0.522497392  | NA                   | NA                   |
| m.i  | unknown Atopobiaceae [meta_mOTU_v2_6458]                      | 5_CD24- CD45RO- CD8+ CD4- CD3+ (ul)          | 0.041123434 | 0.000425348 | 0.394947055  | NA                   | NA                   |
| m.i  | unknown Atopobiaceae [meta_mOTU_v2_6458]                      | 4_CD56dim CD16+ CD3- %                       | 0.001049997 | 0.000136687 | 0.547049077  | NA                   | NA                   |
| m.i  | Streptococcus anginosus [ref_mOTU_v2_0687]                    | 9_IL-17a- IFNg+ Va7.2+ CD161+ CD4- CD3+ (ul) | 0.049697609 | 0.038389987 | -0.419994295 | NA                   | DEPLETED-NS-NS       |
| m.i  | Bacteroides fragilis [ref_mOTU_v2_0287]                       | 1_CD4bright CD8dim % CD4+ CD8+ CD3+          | 0.01256832  | 0.001104084 | -0.470166074 | NA                   | NA                   |
| m.i  | Bacteroides fragilis [ref_mOTU_v2_0287]                       | 1_CD4dim CD8bright % CD4+ CD8+ CD3+          | 0.012765844 | 0.001093616 | 0.465342299  | NA                   | NA                   |
| m.i  | Clostridium sp. L2-50 [ref_mOTU_v2_4212]                      | 5_CD24+ CD45RO+ CD25+ CD4+ % CD4high CD8-    | 0.014635046 | 0.000810664 | 0.493986838  | NA                   | NA                   |
| m.i  | unknown Clostridiales [meta_mOTU_v2_6561]                     | 2_FoxP3+ CD31- CD25high CD127low % CD4+      | 0.012073581 | 5.86563E-05 | 0.484956405  | NA                   | NA                   |
| m.i  | unknown Clostridiales [meta_mOTU_v2_6561]                     | 2_FoxP3+ CD45RA- CD25high CD127low CD4+ (ul) | 0.035799408 | 0.001497226 | 0.400504058  | NA                   | DEPLETED-NS-NS       |
| m.i  | unknown Clostridiales [meta_mOTU_v2_6561]                     | 2_FoxP3+ CD45RA- CD25high CD127low % CD4+    | 0.012319783 | 0.000204291 | 0.462126873  | NA                   | NA                   |
| m.i  | unknown Clostridiales [meta_mOTU_v2_6561]                     | 2_CD25high CD127low % CD4+                   | 0.012073581 | 0.000235793 | 0.472272544  | NA                   | NA                   |
| m.i  | Lactobacillus sakei [ref_mOTU_v2_0992]                        | 9_IL-17a+ IFNg+ Va7.2+ CD161 % CD3+          | 0.020604523 | 3.68183E-05 | 0.486396213  | NA                   | NA                   |
| m.i  | Lactobacillus sakei [ref_mOTU_v2_0992]                        | 9_IL-17a+ IFNg+ % Va7.2+ CD161 CD3+          | 0.032584614 | 5.84853E-05 | 0.475936079  | NA                   | NA                   |
| m.i  | Lactobacillus sakei [ref_mOTU_v2_0992]                        | 9_IL-17a+ IFNg+ Va7.2+ CD161+ CD4- CD3+ (ul) | 0.040750515 | 7.33045E-05 | 0.470706012  | NA                   | NA                   |
| m.i  | Eggerthella lenta [ref_mOTU_v2_0642]                          | 9_IL-17a- IFNg+ Va7.2+ CD161+ CD4- CD3+ (ul) | 0.042075081 | 0.010207995 | -0.430924402 | NS-DEPLETED-NS       | DEPLETED-NS-NS       |
| m.i  | Ruminococcus gnavus [ref_mOTU_v2_0280]                        | 5_CD4_Teff/Treg                              | 0.041361481 | 0.007294061 | -0.429508507 | NA                   | ENRICHED-NS-NS       |
| m.i  | Ruminococcus gnavus [ref_mOTU_v2_0280]                        | 1_CD19+ %                                    | 0.041361481 | 0.029000788 | 0.419964853  | NA                   | DEPLETED-ENRICHED-NS |
| m.i  | unknown Clostridiales [meta_mOTU_v2_7800]                     | 5_CD24- CD45RO- CD8+ CD4- CD3+ (ul)          | 0.045729355 | 0.002021104 | 0.364692928  | NA                   | NA                   |
| m.i  | Ruminococcus lactaris [ref_mOTU_v2_0281]                      | 8_IL-10+ IL-2- % IL-17a- CD3+                | 0.000530926 | 0.00209565  | -0.559429654 | NA                   | NA                   |
| m.i  | Ruminococcus lactaris [ref_mOTU_v2_0281]                      | 8_IL-10+ IL-2- IL-17a- % CD3+                | 0.000564063 | 0.002207219 | -0.55835044  | NA                   | NA                   |
| m.i  | Eubacterium rectale [ref_mOTU_v2_1416]                        | 1_CD4- CD8- %                                | 0.009651885 | 0.043673962 | 0.502986355  | DEPLETED-ENRICHED-NS | NA                   |
| m.i  | unknown Sutterella [meta_mOTU_v2_7526]                        | 2_FoxP3+ CD45RA- % CD25high CD127low CD4+    | 0.041479481 | 0.040545205 | -0.353175362 | NA                   | NA                   |
| m.i  | Bacteroides coprophilus [ref_mOTU_v2_4472]                    | 9_Va7.2+ CD161 CD4- CD3+ (ul)                | 0.039977099 | 0.003775632 | 0.413933974  | NA                   | DEPLETED-ENRICHED-NS |
| m.i  | Holdemanella bififormis [meta_mOTU_v2_7589]                   | 5_CD24- CD45RO+ CD25+ CD4+ % CD4high CD8-    | 0.034490034 | 0.02717235  | -0.453355948 | NA                   | NA                   |
| m.i  | Holdemanella bififormis [meta_mOTU_v2_7589]                   | 5_CD24- CD45RO- CD8+ CD4- CD3+ (ul)          | 0.022239908 | 0.021380448 | 0.408487826  | NA                   | NA                   |

Table S7

| Test | Feature1                                     | Feature2                                    | CORONA_Q    | CORONA_LRP  | CORONA_R     | Feature1CORONA | Feature2CORONA             |
|------|----------------------------------------------|---------------------------------------------|-------------|-------------|--------------|----------------|----------------------------|
| m.i  | Holdemanella biformis [meta_mOTU_v2_7589]    | 5_CD24+ CD45RO- % CD8+ CD4-                 | 0.003479523 | 0.009503691 | -0.51477802  | NA             | NS-ENRICHED-NS             |
| m.i  | Holdemanella biformis [meta_mOTU_v2_7589]    | 5_CD4_Teff/Treg                             | 0.046056321 | 0.041843229 | 0.378326324  | NA             | ENRICHED-NS-NS             |
| m.i  | Holdemanella biformis [meta_mOTU_v2_7589]    | 4_CD56dim CD16+ CD3- %                      | 0.029320623 | 0.043796104 | 0.392996329  | NA             | NA                         |
| m.i  | Holdemanella biformis [meta_mOTU_v2_7589]    | 4_CD56dim CD16+ % CD3-                      | 0.029320623 | 0.043796104 | 0.392996329  | NA             | NA                         |
| m.i  | Holdemanella biformis [meta_mOTU_v2_7589]    | 1_CD19+ %                                   | 0.01006004  | 0.005144554 | -0.455607476 | NA             | DEPLETED-ENRICHED-NS       |
| m.i  | Holdemanella biformis [meta_mOTU_v2_7589]    | 5_CD24+ CD45RO- % CD25+ CD4+ CD4high CD8-   | 0.047736331 | 0.02180055  | 0.426077696  | NA             | NA                         |
| m.i  | Holdemanella biformis [meta_mOTU_v2_7589]    | 2_FoxP3+ CD45RA- % CD25high CD127low CD4+   | 0.022650651 | 0.018613    | -0.3926913   | NA             | NA                         |
| m.i  | unknown Akkermansia [meta_mOTU_v2_7059]      | 5_CD24+ CD45RO+ CD8+ CD4- CD3+ (ul)         | 0.025514838 | 0.048543823 | -0.443997263 | NA             | NS-ENRICHED-ENRICHED       |
| m.i  | bacterium LF-3 [ref_mOTU_v2_3608]            | 6_CD161+ CCR6- CXCR3- CD25+ % CD4+          | 0.00095227  | 0.025650573 | -0.548853628 | NS-DEPLETED-NS | NA                         |
| m.i  | bacterium LF-3 [ref_mOTU_v2_3608]            | 6_CD161+ CCR6- CXCR3- CD25- CD4+ (ul)       | 0.03226445  | 0.042638387 | -0.422037002 | NS-DEPLETED-NS | NA                         |
| m.i  | bacterium LF-3 [ref_mOTU_v2_3608]            | 6_CD161+ CCR6- CXCR3- CD25+ CD4+ (ul)       | 0.00537034  | 0.013440118 | -0.515244008 | NS-DEPLETED-NS | DEPLETED-ENRICHED-NS       |
| m.i  | Blautia obeum [ref_mOTU_v2_4719]             | 2_FoxP3+ CD45RA- CD25high CD127low % CD4+   | 0.003100718 | 0.01521737  | -0.49390948  | NA             | NA                         |
| m.i  | Blautia obeum [ref_mOTU_v2_4719]             | 2_FoxP3+ CD45RA- % CD25high CD127low CD4+   | 0.000427965 | 0.000517413 | -0.555108804 | NA             | NA                         |
| m.i  | Blautia obeum [ref_mOTU_v2_4719]             | 2_FoxP3+ CD31- % CD25high CD127low CD4+     | 0.04339191  | 0.022203655 | -0.393605447 | NA             | NA                         |
| m.i  | Blautia obeum [ref_mOTU_v2_4719]             | 5_CD62L- CD45RO+ CD8+ CD4- CD3+ (ul)        | 0.003384833 | 0.015343835 | 0.524571301  | NA             | DEPLETED-ENRICHED-NS       |
| m.i  | Blautia obeum [ref_mOTU_v2_4202]             | 7_IL-17a+ Ki67- CD4+ CD3+ (ul)              | 0.040987328 | 0.009735344 | 0.453789635  | NA             | NA                         |
| m.i  | Blautia obeum [ref_mOTU_v2_4202]             | 7_IL-17a+ Ki67+ CD4+ CD3+ (ul)              | 0.044764462 | 0.001789374 | 0.46848325   | NA             | NA                         |
| m.i  | Blautia obeum [ref_mOTU_v2_4202]             | 0_IL-17a- IL-22- % TCRgd+ CD3+              | 0.018448095 | 0.015491738 | 0.473040287  | NA             | NA                         |
| m.i  | Blautia obeum [ref_mOTU_v2_4202]             | 7_Helios- Ki67+ % CD3+                      | 0.005384876 | 2.83698E-05 | 0.515188569  | NA             | NA                         |
| m.i  | Blautia obeum [ref_mOTU_v2_4202]             | 7_Helios+ Ki67+ CD4+ CD3+ (ul)              | 0.003893633 | 0.00215299  | 0.521770619  | NA             | NA                         |
| m.i  | Blautia obeum [ref_mOTU_v2_4202]             | 7_Helios+ Ki67+ % CD3+                      | 0.005121058 | 0.001464917 | 0.516217292  | NA             | NA                         |
| m.i  | Blautia obeum [ref_mOTU_v2_4202]             | 7_IFNg- IL-17a+ CD4+ CD3+ (ul)              | 0.009717452 | 0.001160809 | 0.502842002  | NA             | NA                         |
| m.i  | Blautia obeum [ref_mOTU_v2_4202]             | 5_CD62L- CD45RO+ CD25+ CD4+ CD8- CD3+ (ul)  | 0.005232254 | 0.000233309 | 0.50125848   | NA             | DEPLETED-NS-NS             |
| m.i  | Blautia obeum [ref_mOTU_v2_4202]             | 0_IL-17a- IL-22+ % TCRgd+ CD3+              | 0.0052863   | 0.004151697 | -0.499836034 | NA             | NA                         |
| m.i  | Blautia obeum [ref_mOTU_v2_4202]             | 7_Helios- Ki67+ CD4+ CD3+ (ul)              | 0.00233707  | 9.90497E-05 | 0.53186097   | NA             | NA                         |
| m.i  | Blautia obeum [ref_mOTU_v2_4202]             | 7_Helios- Ki67- % CD3+                      | 0.036252713 | 0.000559064 | -0.473451866 | NA             | NS-ENRICHED-ENRICHED       |
| m.i  | Blautia obeum [ref_mOTU_v2_4202]             | 7_IFNg- IL-17a+ % CD3+                      | 0.028348527 | 0.00089897  | 0.479150638  | NA             | NA                         |
| m.i  | Blautia obeum [ref_mOTU_v2_4202]             | 7_IL-17a+ IL-22+ CD4+ CD3+ (ul)             | 0.025354728 | 0.000633271 | 0.48170382   | NA             | NA                         |
| m.i  | Blautia obeum [ref_mOTU_v2_4202]             | 5_Tcm/2_Treg                                | 0.008992769 | 0.034540532 | -0.513968765 | NA             | NA                         |
| m.i  | unknown Faecalibacterium [meta_mOTU_v2_5815] | 5_CD62+ CD45RO+ % CD25- CD4+ CD4high CD8-   | 0.016526542 | 0.00379016  | -0.454109083 | NA             | NA                         |
| m.i  | unknown Faecalibacterium [meta_mOTU_v2_5815] | 4_CD8- CD4- CD56+ CD3+ %                    | 0.000424099 | 0.013400085 | 0.555272557  | NA             | NA                         |
| m.i  | unknown Faecalibacterium [meta_mOTU_v2_5815] | 5_CD62L+ CD45RO+ CD25- CD4+ % CD4high CD8-  | 0.016526542 | 0.003334469 | -0.447730852 | NA             | NA                         |
| m.i  | unknown Faecalibacterium [meta_mOTU_v2_5815] | 4_CD56dim CD16- CD3- %                      | 0.002089244 | 0.007028422 | -0.53403399  | NA             | NA                         |
| m.i  | Holdemanella biformis [ref_mOTU_v2_4395]     | 4_CD56high CD16+ CD3- (ul)                  | 0.047513872 | 0.004051066 | 0.427665672  | NA             | NA                         |
| m.i  | Holdemanella biformis [ref_mOTU_v2_4395]     | 4_CD56high CD16+ % CD3-                     | 0.035641472 | 0.001252874 | 0.445816228  | NA             | NA                         |
| m.i  | Holdemanella biformis [ref_mOTU_v2_4395]     | 4_CD56high CD16+ CD3- %                     | 0.035641472 | 0.001252874 | 0.445816228  | NA             | NA                         |
| m.i  | unknown Clostridiales [meta_mOTU_v2_6777]    | 2_CD31+ CD45RA- CD25high CD127low % CD4+    | 0.008724279 | 0.000716902 | 0.495313075  | NA             | NA                         |
| m.i  | unknown Clostridiales [meta_mOTU_v2_6777]    | 2_CD31+ CD45RA- CD25high CD127low CD4+ (ul) | 0.048213085 | 0.003211196 | 0.458497939  | NA             | NA                         |
| m.i  | Clostridium sp. CAG:273 [meta_mOTU_v2_5681]  | 3_CD123+ CD14- CD16- HLA-DR+ CD4dim/- %     | 0.009787716 | 0.000420492 | -0.502688311 | NA             | ENRICHED-DEPLETED-ENRICHED |
| m.i  | Clostridium sp. CAG:273 [meta_mOTU_v2_5681]  | 3_CD123+ CD14- CD16- HLA-DR+ % CD4dim/-     | 0.000415457 | 5.98055E-05 | -0.563762646 | NA             | ENRICHED-NS-NS             |
| m.i  | Azospirillum sp. 51_20 [meta_mOTU_v2_5652]   | 5_CD24+ CD45RO- % CD8+ CD4-                 | 0.03914005  | 0.029565152 | -0.402320346 | NA             | NS-ENRICHED-NS             |
| m.i  | Azospirillum sp. 51_20 [meta_mOTU_v2_5652]   | 5_CD24- CD45RO- % CD8+ CD4-                 | 0.03914005  | 0.028266094 | 0.441722843  | NA             | NS-DEPLETED-NS             |
| m.i  | unknown Firmicutes [meta_mOTU_v2_6331]       | 8_TNFa- IL-5+ IL-17a+ % CD3+                | 0.033567201 | 0.032884199 | -0.458714507 | NA             | NA                         |
| m.i  | unknown Firmicutes [meta_mOTU_v2_6331]       | 5_CD24- CD45RO- CD8+ CD4- CD3+ (ul)         | 0.017347653 | 0.001701091 | 0.4202989    | NA             | NA                         |
| m.i  | unknown Firmicutes [meta_mOTU_v2_6331]       | 7_IL-17a- Ki67- CD4+ CD3+ (ul)              | 0.02019259  | 0.02052055  | 0.486849351  | NA             | NS-ENRICHED-NS             |
| m.i  | unknown Firmicutes [meta_mOTU_v2_6331]       | 7_Helios- Ki67- CD4+ CD3+ (ul)              | 0.022959423 | 0.005330983 | 0.483957017  | NA             | NS-ENRICHED-NS             |
| m.i  | unknown Firmicutes [meta_mOTU_v2_6331]       | 5_CD62L+ CD45RO- CD25- CD4+ CD8- CD3+ (ul)  | 0.000304821 | 0.034559322 | 0.56914695   | NA             | DEPLETED-ENRICHED-NS       |
| m.i  | unknown Firmicutes [meta_mOTU_v2_6331]       | 8_TNFa+ IL-2+ % IL-17a+ CD3+                | 0.000151985 | 0.036015272 | 0.580908963  | NA             | NA                         |
| m.i  | unknown Firmicutes [meta_mOTU_v2_6331]       | 1_CD4+ CD8- CD3+ (ul)                       | 0.024013971 | 0.042820742 | 0.482939344  | NA             | DEPLETED-ENRICHED-NS       |
| m.i  | unknown Firmicutes [meta_mOTU_v2_6331]       | 7_IL-17a- IL-22- CD4+ CD3+ (ul)             | 0.00683602  | 0.020751553 | 0.510255827  | NA             | DEPLETED-ENRICHED-NS       |
| m.i  | unknown Firmicutes [meta_mOTU_v2_6331]       | 7_Helios- IFNg- CD4+ CD3+ (ul)              | 0.014626369 | 0.004061662 | 0.493999842  | NA             | NS-ENRICHED-NS             |
| m.i  | unknown Firmicutes [meta_mOTU_v2_6331]       | 7_FoxP3- Ki67- CD4+ CD3+ (ul)               | 0.025590134 | 0.002677823 | 0.481493178  | NA             | DEPLETED-ENRICHED-NS       |
| m.i  | unknown Firmicutes [meta_mOTU_v2_6331]       | 9_IL-2+ TNFa+ Va7.2+ CD161+ CD4- CD3+ (ul)  | 0.007092627 | 0.000788101 | 0.50948714   | NA             | DEPLETED-NS-NS             |
| m.i  | unknown Firmicutes [meta_mOTU_v2_6331]       | 9_IL-2+ TNFa+ % Va7.2+ CD161 CD3+           | 0.00098752  | 0.000274258 | 0.548183454  | NA             | NA                         |

Table S7

| Test | Feature1                                                | Feature2                                          | CORONA_Q    | CORONA_LRP  | CORONA_R     | Feature1CORONA   | Feature2CORONA       |
|------|---------------------------------------------------------|---------------------------------------------------|-------------|-------------|--------------|------------------|----------------------|
| m.i  | unknown Clostridiales [meta_mOTU_v2_6891]               | 5_CD4+ CD8+ %                                     | 0.030781612 | 0.010565385 | -0.44240604  | NA               | NA                   |
| m.i  | unknown Clostridiales [meta_mOTU_v2_6891]               | 5_CD62L- CD45RO- CD8+ CD4- CD3+ (ul)              | 0.043604885 | 0.045037428 | 0.435967022  | NA               | NA                   |
| m.i  | Bacteroidales sp. [ref_mOTU_v2_1074]                    | 2_FoxP3+ % CD25high CD127low CD4+                 | 0.01991541  | 0.010087849 | 0.461555216  | NA               | NA                   |
| m.i  | Bacteroides fragilis/ovatus [ref_mOTU_v2_1073]          | 0_IL-17a- IL-22+ % TCRgd+ CD3+                    | 0.01004455  | 0.00545928  | -0.492220928 | ENRICHED-DEplete | NA                   |
| m.i  | Bacteroides fragilis/ovatus [ref_mOTU_v2_1073]          | 0_IL-17a- IL-22- % TCRgd+ CD3+                    | 0.021137933 | 0.016842791 | 0.458855917  | ENRICHED-DEplete | NA                   |
| m.i  | Parabacteroides merdae [ref_mOTU_v2_1378]               | 5_CD4+ CD8+ %                                     | 0.025715813 | 0.002082124 | -0.475125192 | NA               | NA                   |
| m.i  | unknown Anaeromassilibacillus [meta_mOTU_v2_535]        | 2_FoxP3+ CD45RA- % CD25high CD127low CD4+         | 0.027253164 | 0.001143365 | 0.452579537  | NA               | NA                   |
| m.i  | Flavonifractor plautii [ref_mOTU_v2_1377]               | 4_CD56high CD16+ % CD3-                           | 0.048431376 | 0.011825153 | -0.419428692 | NA               | NA                   |
| m.i  | Flavonifractor plautii [ref_mOTU_v2_1377]               | 2_FoxP3+ CD45RA- CD25high CD127low % CD4+         | 0.048431376 | 0.006052317 | 0.418265645  | NA               | NA                   |
| m.i  | Flavonifractor plautii [ref_mOTU_v2_1377]               | 1_CD4- CD8+ % CD3+                                | 0.048603909 | 0.047178555 | -0.407779555 | NA               | NA                   |
| m.i  | Flavonifractor plautii [ref_mOTU_v2_1377]               | 4_CD56high CD16+ CD3- %                           | 0.048431376 | 0.011825153 | -0.419428692 | NA               | NA                   |
| m.i  | Bacteroides cellulosilyticus/timonensis [ref_mOTU_v2_0] | 0_IL-17a- IL-22+ % TCRgd+ CD3+                    | 0.0052863   | 0.001578443 | -0.493780415 | NA               | NA                   |
| m.i  | Bacteroides cellulosilyticus/timonensis [ref_mOTU_v2_0] | 0_IL-17a- IL-22- % TCRgd+ CD3+                    | 0.020032239 | 0.00324664  | 0.454355017  | NA               | NA                   |
| m.i  | unknown Clostridiales [meta_mOTU_v2_6721]               | 2_CD31+ CD45RA- CD25high CD127low CD4+ (ul)       | 0.048213085 | 0.04160562  | -0.449729576 | NA               | NA                   |
| m.i  | unknown Clostridiales [meta_mOTU_v2_6721]               | 2_CD39+ CD31+ CD25high CD127low CD4+ (ul)         | 0.049726406 | 0.027159415 | -0.465977749 | NA               | NA                   |
| m.i  | unknown Clostridiales [meta_mOTU_v2_6721]               | 8_GM-CSF+ IL-2- IL-17a- CD4+ CD3+ (ul)            | 0.000529434 | 0.046954555 | -0.551244843 | NA               | DEPLETED-ENRICHED-NS |
| m.i  | Coprococcus catus [ref_mOTU_v2_4874]                    | 5_CD24- CD45RO- % CD8+ CD4-                       | 0.049001016 | 0.033693974 | 0.412941922  | NA               | NS-DEPLETED-NS       |
| m.i  | Coprococcus catus [ref_mOTU_v2_4874]                    | 5_CD4_Teff/Treg                                   | 0.007142552 | 0.042112318 | 0.484590478  | NA               | ENRICHED-NS-NS       |
| m.i  | Coprococcus catus [ref_mOTU_v2_4874]                    | 5_CD4_Teff/2_Treg                                 | 0.039707252 | 0.031524225 | 0.426282684  | NA               | NA                   |
| m.i  | unknown Clostridiales [meta_mOTU_v2_5991]               | 2_FoxP3+ CD31- % CD25high CD127low CD4+           | 0.03254797  | 0.041761417 | -0.395553671 | NA               | NA                   |
| m.i  | Ruminococcus torques [ref_mOTU_v2_1376]                 | 4_CD56 high CD16- % CD56+ CD3-                    | 0.040125599 | 0.041826437 | -0.454317202 | NA               | NS-ENRICHED-ENRICHED |
| m.i  | Bacteroides eggerthii [ref_mOTU_v2_1410]                | 9_IL-17a- IFNg+ Va7.2+ CD161+ CD4- CD3+ (ul)      | 0.027312926 | 0.008029574 | 0.446571886  | NA               | DEPLETED-NS-NS       |
| m.i  | Bacteroides eggerthii [ref_mOTU_v2_1410]                | 9_IFNg+ TNFa+ Va7.2+ CD161+ CD4- CD3+ (ul)        | 0.033349374 | 0.00123148  | 0.475397459  | NA               | DEPLETED-NS-NS       |
| m.i  | Bacteroides eggerthii [ref_mOTU_v2_1410]                | 9_IL2- TNFa+ Va7.2+ CD161+ CD4- CD3+ (ul)         | 0.017334257 | 0.003183492 | 0.464904959  | NA               | DEPLETED-NS-NS       |
| m.i  | Bacteroides eggerthii [ref_mOTU_v2_1410]                | 9_IL-17a- TNFa+ Va7.2+ CD161+ CD4- CD3+ (ul)      | 0.01335228  | 0.00175551  | 0.48051979   | NA               | DEPLETED-NS-NS       |
| m.i  | Eubacterium hallii [ref_mOTU_v2_4207]                   | 5_CD62L+ CD45RO+ CD25- CD4+ % CD4high CD8-        | 0.003997912 | 0.015149175 | -0.498321603 | NA               | NA                   |
| m.i  | Eubacterium hallii [ref_mOTU_v2_4207]                   | 5_CD62+ CD45RO+ % CD25- CD4+ CD4high CD8-         | 0.003481397 | 0.011773287 | -0.501300133 | NA               | NA                   |
| m.i  | Eubacterium hallii [ref_mOTU_v2_4207]                   | 5_CD8_Tem/Tcm                                     | 0.004020631 | 0.032712675 | 0.491912039  | NA               | NA                   |
| m.i  | Barnesiella intestinihominis [ref_mOTU_v2_4880]         | 9_IL-17a- IFNg+ Va7.2+ CD161+ CD4- CD3+ (ul)      | 0.003639576 | 0.002215227 | 0.510820669  | NA               | DEPLETED-NS-NS       |
| m.i  | Barnesiella intestinihominis [ref_mOTU_v2_4880]         | 9_IL-17a- TNFa+ Va7.2+ CD161+ CD4- CD3+ (ul)      | 0.004685372 | 0.001699935 | 0.51803002   | NA               | DEPLETED-NS-NS       |
| m.i  | Barnesiella intestinihominis [ref_mOTU_v2_4880]         | 9_IL2- TNFa+ Va7.2+ CD161+ CD4- CD3+ (ul)         | 0.000868957 | 0.001486812 | 0.550535228  | NA               | DEPLETED-NS-NS       |
| m.i  | Barnesiella intestinihominis [ref_mOTU_v2_4880]         | 9_IL2- TNFa+ Va7.2+ CD161 % CD3+                  | 0.009372993 | 0.006213611 | 0.488511819  | NA               | NA                   |
| m.i  | Barnesiella intestinihominis [ref_mOTU_v2_4880]         | 9_IFNg- TNFa+ Va7.2+ CD161+ CD4- CD3+ (ul)        | 0.020559269 | 0.008839139 | 0.48644558   | NA               | NA                   |
| m.i  | Barnesiella intestinihominis [ref_mOTU_v2_4880]         | 9_IFNg+ TNFa+ Va7.2+ CD161+ CD4- CD3+ (ul)        | 0.033761797 | 0.004339135 | 0.457524629  | NA               | DEPLETED-NS-NS       |
| m.i  | Parabacteroides goldsteinii [ref_mOTU_v2_0901]          | 5_CD4+ CD8+ %                                     | 0.047704259 | 0.025703377 | -0.421121742 | NA               | NA                   |
| m.i  | Parabacteroides goldsteinii [ref_mOTU_v2_0901]          | 3_HLA-DR-CD4dim/- (ul)                            | 0.016122914 | 0.014441898 | 0.44232523   | NA               | NA                   |
| m.i  | Parabacteroides goldsteinii [ref_mOTU_v2_0901]          | 8_TNFa+ IL-5+ IL-17a- % CD3+                      | 0.035460443 | 0.021608559 | 0.441178618  | NA               | DEPLETED-NS-NS       |
| m.i  | Parabacteroides goldsteinii [ref_mOTU_v2_0901]          | 3_HLA-DR+ CD16+ HLA-DR- CD16- (ul)                | 0.027190356 | 0.01284345  | 0.453912253  | NA               | NA                   |
| m.i  | Parabacteroides goldsteinii [ref_mOTU_v2_0901]          | 8_TNFa- IL-2- % IL-17a- CD3+                      | 0.039705367 | 0.036090675 | -0.414961643 | NA               | ENRICHED-NS-NS       |
| m.i  | Parabacteroides goldsteinii [ref_mOTU_v2_0901]          | 8_TNFa+ IL-5+ IL-17a- CD4+ CD3+ (ul)              | 0.022376363 | 0.011947714 | 0.468489474  | NA               | DEPLETED-ENRICHED-NS |
| m.i  | Parabacteroides goldsteinii [ref_mOTU_v2_0901]          | 8_TNFa+ IL-2- IL-17a- CD4+ CD3+ (ul)              | 0.037177405 | 0.020084097 | 0.436195322  | NA               | DEPLETED-NS-NS       |
| m.i  | Parabacteroides goldsteinii [ref_mOTU_v2_0901]          | 8_TNFa- IL-2- IL-17a- % CD3+                      | 0.044578334 | 0.036922759 | -0.413630652 | NA               | ENRICHED-NS-NS       |
| m.i  | Parabacteroides goldsteinii [ref_mOTU_v2_0901]          | 8_TNFa+ IL-5- IL-17a- CD4+ CD3+ (ul)              | 0.045119665 | 0.0288721   | 0.42206663   | NA               | DEPLETED-NS-NS       |
| m.i  | Parabacteroides goldsteinii [ref_mOTU_v2_0901]          | 8_TNFa+ IL-5+ % IL-17a- CD3+                      | 0.034365175 | 0.021787939 | 0.441153329  | NA               | DEPLETED-NS-NS       |
| m.i  | Bacteroides dorei/vulgatus [ref_mOTU_v2_0898]           | 2_FoxP3+ CD45RA- CD25high CD127low % CD4+         | 0.002798247 | 0.027895285 | 0.487570916  | NS-DEPLETED-NS   | NA                   |
| m.i  | Bacteroides dorei/vulgatus [ref_mOTU_v2_0898]           | 2_FoxP3- CD45RA+ % CD25high CD127low CD4+         | 0.035754142 | 0.023223013 | -0.433809723 | NS-DEPLETED-NS   | NA                   |
| m.i  | Eubacterium ventriosum [ref_mOTU_v2_4204]               | 7_IL-17a+ Ki67- CD4+ CD3+ (ul)                    | 0.040987328 | 0.025145926 | 0.459112114  | NA               | NA                   |
| m.i  | Eubacterium ventriosum [ref_mOTU_v2_4204]               | 7_IL-17a+ IL-22- CD4+ CD3+ (ul)                   | 0.029209641 | 0.011199692 | 0.478462637  | NA               | NA                   |
| m.i  | unknown Bacteroidales [meta_mOTU_v2_5520]               | 3_CD14low CD16++ HLA-DR+ CD16+ HLA-DR- CD16- (ul) | 0.003161855 | 0.000158618 | -0.525925204 | NA               | NS-DEPLETED-NS       |
| m.i  | unknown Clostridiales [meta_mOTU_v2_6672]               | 2_FoxP3+ CD31- CD25high CD127low % CD4+           | 0.000222149 | 0.013190029 | 0.555357456  | NA               | NA                   |
| m.i  | unknown Clostridiales [meta_mOTU_v2_6672]               | 2_FoxP3+ CD31- % CD25high CD127low CD4+           | 0.03038544  | 0.040538436 | 0.415649854  | NA               | NA                   |
| m.i  | unknown Clostridiales [meta_mOTU_v2_6672]               | 1_CD19+ %                                         | 0.019756973 | 0.005652948 | 0.41609936   | NA               | DEPLETED-ENRICHED-NS |
| m.i  | unknown Clostridiales [meta_mOTU_v2_6672]               | 2_FoxP3+ CD45RA- CD25high CD127low % CD4+         | 0.000211053 | 0.017133055 | 0.5651221    | NA               | NA                   |
| m.i  | unknown Clostridiales [meta_mOTU_v2_6672]               | 2_CD25high CD127low % CD4+                        | 0.002331067 | 0.028306593 | 0.510796566  | NA               | NA                   |

Table S7

| Test | Feature1                                       | Feature2                                     | CORONA_Q    | CORONA_LRP   | CORONA_R     | Feature1CORONA | Feature2CORONA       |
|------|------------------------------------------------|----------------------------------------------|-------------|--------------|--------------|----------------|----------------------|
| m.i  | unknown Clostridiales [meta_mOTU_v2_6926]      | 4_CD56high CD16+ CD3- %                      | 0.016485372 | 0.01998058   | 0.460144822  | NA             | NA                   |
| m.i  | unknown Clostridiales [meta_mOTU_v2_6926]      | 4_CD56high CD16+ % CD3-                      | 0.016485372 | 0.01998058   | 0.460144822  | NA             | NA                   |
| m.i  | unknown Clostridiales [meta_mOTU_v2_7148]      | 2_FoxP3+ CD45RA- % CD25high CD127low CD4+    | 0.041479481 | 0.040545205  | -0.353175362 | NA             | NA                   |
| m.i  | unknown Clostridiales [meta_mOTU_v2_6795]      | 6_CD27- CD25- % CD4+                         | 0.043925716 | 0.00165907   | -0.453748228 | NA             | ENRICHED-DEPLETED-NS |
| m.i  | unknown Clostridiales [meta_mOTU_v2_6795]      | 6_CD27- % CD25- CD4+                         | 0.043141715 | 0.000774861  | -0.452514179 | NA             | NS-DEPLETED-NS       |
| m.i  | unknown Clostridiales [meta_mOTU_v2_6190]      | 6_CD161+ CCR6- CXCR3- CD25+ CD4+             | 0.037146141 | 0.011449738  | 0.456225617  | NA             | NA                   |
| m.i  | unknown Clostridiales [meta_mOTU_v2_6190]      | 6_CD161+ CCR6- CXCR3- CD25+ CD4+ (ul)        | 0.017663829 | 0.018746565  | -0.474055577 | NA             | DEPLETED-ENRICHED-NS |
| m.i  | unknown Clostridiales [meta_mOTU_v2_6190]      | 6_CD161+ CCR6- CXCR3- % CD25+ CD4+           | 0.014927023 | 0.007549832  | 0.493553384  | NA             | NA                   |
| m.i  | unknown Clostridiales [meta_mOTU_v2_6190]      | 2_FoxP3+ CD31- CD25high CD127low CD4+ (ul)   | 0.024553138 | 0.032995343  | -0.466277879 | NA             | DEPLETED-NS-NS       |
| m.i  | unknown Clostridiales [meta_mOTU_v2_6190]      | 2_FoxP3+ CD39- CD25high CD127low CD4+ (ul)   | 0.034045918 | 0.040908043  | -0.448278307 | NA             | NA                   |
| m.i  | unknown Clostridiales [meta_mOTU_v2_6190]      | 6_CD161+ CCR6- % CXCR3- CD25+ CD4+           | 0.017183191 | 0.039979252  | -0.474698664 | NA             | NA                   |
| m.i  | unknown Clostridiales [meta_mOTU_v2_6190]      | 6_CD161+ CCR6- CXCR3- % CD25+ CD4+           | 0.03352072  | 0.042577023  | -0.457049962 | NA             | NA                   |
| m.i  | unknown Clostridiales [meta_mOTU_v2_7527]      | 5_CD62L- CD45RO- CD25+ CD4+ % CD4high CD8-   | 0.03565787  | 0.032126448  | -0.458125754 | NA             | NA                   |
| m.i  | Hungatella hathewayi [ref_mOTU_v2_0882]        | 9_IL-17a- TNFa+ Va7.2+ CD161+ CD4- CD3+ (ul) | 0.022685847 | 0.001777483  | -0.456315469 | NA             | DEPLETED-NS-NS       |
| m.i  | Hungatella hathewayi [ref_mOTU_v2_0882]        | 9_IFNg+ TNFa+ Va7.2+ CD161+ CD4- CD3+ (ul)   | 0.043568251 | 0.003097571  | -0.433487621 | NA             | DEPLETED-NS-NS       |
| m.i  | Hungatella hathewayi [ref_mOTU_v2_0882]        | 9_IL2- TNFa+ Va7.2+ CD161+ CD4- CD3+ (ul)    | 0.026863267 | 0.011782024  | -0.44699343  | NA             | DEPLETED-NS-NS       |
| m.i  | Hungatella hathewayi [ref_mOTU_v2_0882]        | 9_IL-17a- IFNg+ Va7.2+ CD161+ CD4- CD3+ (ul) | 0.004610396 | 0.00058086   | -0.508944524 | NA             | DEPLETED-NS-NS       |
| m.i  | unknown Faecalibacterium [meta_mOTU_v2_6452]   | 6_CD161+ CCR6- CXCR3- CD25+ % CD4+           | 0.025792783 | 0.040758808  | 0.453457234  | NA             | NA                   |
| m.i  | unknown Faecalibacterium [meta_mOTU_v2_6452]   | 5_CD24+ CD45RO- % CD25- CD4+ CD4high CD8-    | 0.023609186 | 0.028772365  | 0.464083754  | NA             | NA                   |
| m.i  | unknown Faecalibacterium [meta_mOTU_v2_6452]   | 5_CD24+ CD45RO- CD25- CD4+ % CD4high CD8-    | 0.02089109  | 0.023288641  | 0.470115975  | NA             | NA                   |
| m.i  | unknown Faecalibacterium [meta_mOTU_v2_6452]   | 6_CD161+ CCR6- CXCR3- CD25- % CD4+           | 0.003786972 | 0.0431444793 | 0.522328108  | NA             | NA                   |
| m.i  | unknown Faecalibacterium [meta_mOTU_v2_6452]   | 6_CD161+ CCR6- CXCR3- % CD25+ CD4+           | 0.041208795 | 0.007546105  | 0.420907725  | NA             | NA                   |
| m.i  | unknown Faecalibacterium [meta_mOTU_v2_6452]   | 5_CD24+ CD45RO- CD25- CD4+ CD8- CD3+ (ul)    | 0.020931605 | 0.023500545  | 0.453263793  | NA             | NA                   |
| m.i  | unknown Prevotella [meta_mOTU_v2_6911]         | 5_CD24- CD45RO- CD8+ CD4- CD3+ (ul)          | 0.037738    | 0.000433054  | 0.385657071  | NA             | NA                   |
| m.i  | unknown Prevotella [meta_mOTU_v2_6911]         | 8_TNFa- IL-5- IL-17a- CD4+ CD3+ (ul)         | 0.017404552 | 0.011530445  | 0.490163738  | NA             | NS-ENRICHED-NS       |
| m.i  | unknown Prevotella [meta_mOTU_v2_6911]         | 3_HLA-DR+ CD16+/HLA-DR- CD16- (ul)           | 0.048919752 | 0.035684484  | 0.41615379   | NA             | NA                   |
| m.i  | unknown Clostridiales [meta_mOTU_v2_5362]      | 5_CD62L- CD45RO- CD25- CD4+ % CD4high CD8-   | 0.006204683 | 0.046982455  | 0.512268318  | NA             | ENRICHED-NS-NS       |
| m.i  | unknown Clostridiales [meta_mOTU_v2_5362]      | 5_CD62L- CD45RO- % CD25- CD4+ CD4high CD8-   | 0.001955756 | 0.018504863  | 0.535306874  | NA             | ENRICHED-NS-NS       |
| m.i  | Adlercreutzia equolifaciens [ref_mOTU_v2_3198] | 2_CD31+ CD45RA- CD25high CD127low % CD4+     | 0.010430616 | 0.001904894  | 0.491388261  | NS-NS-DEPLETED | NA                   |
| m.i  | unknown Bacteroidales [meta_mOTU_v2_5951]      | 2_FoxP3+ CD45RA- % CD25high CD127low CD4+    | 0.041479481 | 0.040545205  | -0.353175362 | NA             | NA                   |
| m.i  | unknown Eubacterium [meta_mOTU_v2_6509]        | 5_CD62+ CD45RO+ % CD25- CD4+ CD4high CD8-    | 0.008326415 | 0.004449931  | -0.49033568  | DEPLETED-NS-NS | NA                   |
| m.i  | unknown Eubacterium [meta_mOTU_v2_6509]        | 5_CD62L+ CD45RO+ CD25- CD4+ % CD4high CD8-   | 0.008326415 | 0.006616912  | -0.480875293 | DEPLETED-NS-NS | NA                   |
| m.i  | unknown Eubacterium [meta_mOTU_v2_6509]        | 4_CD56dim CD16- CD3- %                       | 0.036826937 | 0.029804228  | -0.438886782 | DEPLETED-NS-NS | NA                   |
| m.i  | unknown Clostridiales [meta_mOTU_v2_7455]      | 5_CD62L+ CD45RO+ CD25- CD4+ % CD4high CD8-   | 0.012210867 | 0.000552877  | -0.472007135 | NA             | NA                   |
| m.i  | unknown Clostridiales [meta_mOTU_v2_7455]      | 5_CD62+ CD45RO+ % CD25- CD4+ CD4high CD8-    | 0.012210867 | 0.000778746  | -0.473867033 | NA             | NA                   |
| m.i  | Clostridium saccharogumia [ref_mOTU_v2_0473]   | 5_CD62L- CD45RO- CD25- CD4+ % CD4high CD8-   | 0.029722951 | 0.031397075  | -0.435754881 | NA             | ENRICHED-NS-NS       |
| m.i  | Clostridium saccharogumia [ref_mOTU_v2_0473]   | 5_CD62L- CD45RO- % CD25- CD4+ CD4high CD8-   | 0.032371799 | 0.039256191  | -0.433188655 | NA             | ENRICHED-NS-NS       |
| m.i  | Clostridium saccharogumia [ref_mOTU_v2_0473]   | 5_CD4_Teff/Treg                              | 0.007142552 | 0.008109705  | -0.500765969 | NA             | ENRICHED-NS-NS       |
| m.i  | Clostridium saccharogumia [ref_mOTU_v2_0473]   | 5_CD62L- CD45RO- CD25- CD4+ CD8- CD3+ (ul)   | 0.047137236 | 0.025209074  | -0.450296941 | NA             | NA                   |
| m.i  | Clostridium saccharogumia [ref_mOTU_v2_0473]   | 8_IL-10+ IL-2- IL-17a- % CD3+                | 0.02409708  | 0.000307392  | 0.439819483  | NA             | NA                   |
| m.i  | Clostridium saccharogumia [ref_mOTU_v2_0473]   | 8_IL-10+ IL-2- % IL-17a- CD3+                | 0.025489447 | 0.000280857  | 0.441015959  | NA             | NA                   |
| m.i  | Clostridium saccharogumia [ref_mOTU_v2_0473]   | 5_CD4_Teff/2_Treg                            | 0.045032312 | 0.035886237  | -0.419323344 | NA             | NA                   |
| m.i  | unknown Clostridiales [meta_mOTU_v2_6419]      | 2_FoxP3+ CD31- % CD25high CD127low CD4+      | 0.042153664 | 0.014697648  | 0.396248925  | NA             | NA                   |
| m.i  | unknown Clostridiales [meta_mOTU_v2_6419]      | 2_FoxP3+ CD45RA- % CD25high CD127low CD4+    | 0.019040774 | 0.004983372  | 0.461401763  | NA             | NA                   |
| m.i  | unknown Clostridiales [meta_mOTU_v2_6419]      | 2_FoxP3+ CD45RA- CD25high CD127low % CD4+    | 0.042153664 | 0.016882697  | 0.394851721  | NA             | NA                   |
| m.i  | Veillonella parvula [ref_mOTU_v2_1042]         | 0_IL-17a- IFNg+ % TCRgd+ CD3+                | 0.041655727 | 0.028550522  | -0.460409261 | NA             | NA                   |
| m.i  | unknown Clostridiales [meta_mOTU_v2_7158]      | 9_IFNg+ TNFa- Va7.2+ CD161 % CD3+            | 0.027898511 | 0.025427259  | -0.455044134 | NA             | DEPLETED-NS-NS       |
| m.i  | unknown Clostridiales [meta_mOTU_v2_7158]      | 9_IL2- TNFa+ Va7.2+ CD161 % CD3+             | 0.047433202 | 0.017453684  | -0.439785616 | NA             | NA                   |
| m.i  | unknown Clostridiales [meta_mOTU_v2_7158]      | 9_Va7.2+ CD161 CD4- CD3+ (ul)                | 0.007475801 | 0.04092187   | -0.508386349 | NA             | DEPLETED-ENRICHED-NS |
| m.i  | unknown Clostridiales [meta_mOTU_v2_7158]      | 9_IL-17a- IFNg+ Va7.2+ CD161 % CD3+          | 0.020848019 | 0.004636485  | -0.486132306 | NA             | DEPLETED-NS-NS       |
| m.p  | unknown Clostridiales [meta_mOTU_v2_6672]      | pulse_pressure                               | 0.023355811 | 0.028901501  | 0.563632085  | NA             | NS-NS-DEPLETED       |
| m.p  | unknown Clostridiales [meta_mOTU_v2_6190]      | pulse_pressure                               | 0.043742535 | 0.012320027  | -0.52300356  | NA             | NS-NS-DEPLETED       |
| m.p  | uncultured Eubacterium sp. [meta_mOTU_v2_5477] | eGFR                                         | 0.033038255 | 0.027909236  | 0.416522546  | NA             | DEPLETED-NS-NS       |
| m.p  | unknown Clostridiales [meta_mOTU_v2_6028]      | HDL                                          | 0.030681077 | 0.003654286  | 0.460907191  | NA             | NA                   |

Table S7

| Test | Feature1                                         | Feature2       | CORONA_Q     | CORONA_LRP  | CORONA_R     | Feature1CORONA    | Feature2CORONA             |
|------|--------------------------------------------------|----------------|--------------|-------------|--------------|-------------------|----------------------------|
| m.p  | unknown Ruminococcaceae [meta_mOTU_v2_6789]      | pulse_pressure | 0.043742535  | 0.007989338 | 0.519892449  | NA                | NS-NS-DEPLETED             |
| m.p  | Enterobacteriaceae sp. [ref_mOTU_v2_0036]        | pulse_pressure | 0.043742535  | 0.010434989 | 0.531242994  | NS-NS-DEPLETED    | NS-NS-DEPLETED             |
| m.p  | Clostridium sp. CAG:217 [meta_mOTU_v2_7451]      | eGFR           | 0.009891211  | 6.33815E-05 | 0.5024638    | NA                | DEPLETED-NS-NS             |
| m.p  | Blautia hydrogenotrophica [ref_mOTU_v2_4324]     | HDL            | 0.002684321  | 0.049691064 | 0.529154488  | NA                | NA                         |
| m.p  | unknown Synergistaceae [meta_mOTU_v2_6989]       | LDL_HDL_ratio  | 0.035358687  | 0.022853496 | 0.421445852  | NA                | NA                         |
| m.p  | unknown Synergistaceae [meta_mOTU_v2_6989]       | LDL            | 0.0212425947 | 0.013286036 | 0.459776858  | NA                | NA                         |
| m.p  | Ruminococcus gnavus [ref_mOTU_v2_0280]           | pulse_pressure | 0.023355811  | 0.002375985 | 0.570431567  | NA                | NS-NS-DEPLETED             |
| m.p  | Eggerthella lenta [ref_mOTU_v2_0642]             | DBP_ABPM_24h   | 0.040020235  | 0.002863322 | -0.584719314 | NS-DEPLETED-NS    | NA                         |
| m.p  | Eggerthella lenta [ref_mOTU_v2_0642]             | DBP_ABPM_day   | 0.048823344  | 0.005090271 | -0.579305396 | NS-DEPLETED-NS    | NA                         |
| m.p  | Eggerthella lenta [ref_mOTU_v2_0642]             | c_DBP          | 0.033208144  | 0.003429963 | -0.589713917 | NS-DEPLETED-NS    | NS-NS-DEPLETED             |
| m.p  | Faecalibacterium prausnitzii [ref_mOTU_v2_4910]  | DBP_office     | 0.021973802  | 0.000420588 | 0.468920194  | NA                | DEPLETED-ENRICHED-NS       |
| m.p  | Eubacterium rectale [ref_mOTU_v2_1416]           | triglycerol    | 0.019920772  | 0.001031477 | 0.487153091  | DEPLETED-ENRICHED | DEPLETED-ENRICHED-NS       |
| m.p  | Holdemanelia biformis [meta_mOTU_v2_7589]        | eGFR           | 0.033079267  | 0.001143069 | 0.403762024  | NA                | DEPLETED-NS-NS             |
| m.p  | unknown Faecalibacterium [meta_mOTU_v2_5815]     | eGFR           | 0.033038255  | 0.005641283 | 0.410073445  | NA                | DEPLETED-NS-NS             |
| m.p  | unknown Faecalibacterium [meta_mOTU_v2_5815]     | PWV            | 0.011304404  | 0.007160782 | -0.599751166 | NA                | NS-NS-DEPLETED             |
| m.p  | unknown Faecalibacterium [meta_mOTU_v2_5815]     | pulse_pressure | 0.023355811  | 0.00086597  | -0.560941283 | NA                | NS-NS-DEPLETED             |
| m.p  | Alistipes shahii [ref_mOTU_v2_4873]              | Reflex         | 0.037643056  | 0.004000875 | -0.586367573 | NA                | NA                         |
| m.p  | Bacteroidales sp. [ref_mOTU_v2_1074]             | body_fat_ratio | 0.008937316  | 4.9606E-05  | 0.50462181   | NA                | ENRICHED-DEPLETED-DEPLETED |
| m.p  | Bacteroidales sp. [ref_mOTU_v2_1074]             | DBP_office     | 0.021973802  | 0.001793564 | -0.47088366  | NA                | DEPLETED-ENRICHED-NS       |
| m.p  | Bacteroides fragilis [ref_mOTU_v2_0286]          | LDL_HDL_ratio  | 0.00268721   | 0.010159993 | -0.500683375 | NA                | NA                         |
| m.p  | unknown Eggerthellaceae [meta_mOTU_v2_5373]      | PWV            | 0.048151871  | 0.048138694 | -0.526842141 | NA                | NS-NS-DEPLETED             |
| m.p  | Faecalibacterium prausnitzii [meta_mOTU_v2_7154] | IL-6           | 0.015774123  | 0.017665509 | -0.492339088 | NA                | NA                         |
| m.p  | Blautia producta [ref_mOTU_v2_4020]              | eGFR           | 0.037387688  | 0.02033403  | -0.392175307 | NA                | DEPLETED-NS-NS             |
| m.p  | unknown Bacteroidales [meta_mOTU_v2_5647]        | LDL            | 0.04234297   | 0.035979522 | 0.424382948  | NA                | NA                         |
| m.p  | unknown Bacteroidales [meta_mOTU_v2_5647]        | LDL_HDL_ratio  | 0.018787642  | 0.017536295 | 0.445775446  | NA                | NA                         |
| m.p  | Erysipelotrichaceae sp. [ref_mOTU_v2_0885]       | eGFR           | 0.033038255  | 0.005897953 | -0.405664973 | ENRICHED-DEPLETED | DEPLETED-NS-NS             |
| m.p  | Bacteroides massiliensis [ref_mOTU_v2_0455]      | eGFR           | 0.033038255  | 0.007348777 | 0.417377292  | NA                | DEPLETED-NS-NS             |
| m.p  | unknown Clostridiales [meta_mOTU_v2_6629]        | pulse_pressure | 0.023355811  | 0.015490678 | 0.561144814  | NA                | NS-NS-DEPLETED             |
| m.p  | unknown Clostridiales [meta_mOTU_v2_6629]        | eGFR           | 0.033038255  | 0.032373745 | -0.410202635 | NA                | DEPLETED-NS-NS             |
| m.p  | Clostridium sp. CAG:306 [meta_mOTU_v2_5698]      | LDL            | 0.04234297   | 0.004372427 | 0.427967457  | NA                | NA                         |
| m.p  | Clostridium sp. CAG:306 [meta_mOTU_v2_5698]      | LDL_HDL_ratio  | 0.001021611  | 0.011029806 | 0.526542456  | NA                | NA                         |
| m.p  | Azospirillum sp. CAG:239 [meta_mOTU_v2_5386]     | LDL            | 0.00016584   | 0.01089798  | 0.579459493  | NA                | NA                         |
| m.p  | Azospirillum sp. CAG:239 [meta_mOTU_v2_5386]     | cholesterol    | 0.00119411   | 0.014842047 | 0.544657242  | NA                | NA                         |
| m.p  | Azospirillum sp. CAG:239 [meta_mOTU_v2_5386]     | LDL_HDL_ratio  | 0.000117706  | 0.003321481 | 0.585115334  | NA                | NA                         |
| m.p  | unknown Ruminococcus [meta_mOTU_v2_7275]         | eGFR           | 0.033038255  | 0.014485978 | 0.444296411  | NA                | DEPLETED-NS-NS             |
| m.p  | unknown Clostridiales [meta_mOTU_v2_6852]        | eGFR           | 0.033038255  | 0.003270579 | 0.419841964  | NA                | DEPLETED-NS-NS             |
